# Supplementary material for: Comparative investigation of the reactivities between catalysts [Cp*RhCl2]2and [Cp*IrCl2]2in the oxidative annulation of isoquinolones with alkynes: a combined experimental and computational study
Source: Royal Society of Chemistry journal article supplement (doi:10.1039/c7qo00586e), 2017-01-01
Supplement: c7qo00586e1.pdf [file c7qo00586e1.pdf]

## Supporting Information

# Comparative Investigation of Reactivities between Catalysts [Cp\*RhCl<sub>2</sub>]<sub>2</sub> and [Cp\*IrCl<sub>2</sub>]<sub>2</sub> in Oxidative Annulation of Isoquinolones with Alkynes: A Combined Experimental and Computational Study

Chaoyue Zhao,<sup>a,†</sup> Qingmei Ge,<sup>b,‡</sup> Baiquan Wang<sup>\*b</sup> and Xiufang Xu<sup>\*a</sup>

<sup>a</sup> Department of Chemistry, Key Laboratory of Advanced Energy Materials Chemistry  
(Ministry of Education), College of Chemistry, Nankai University, Tianjin, 300071, P. R. China

<sup>b</sup> State Key Laboratory of Elemento-Organic Chemistry, College of Chemistry, Nankai  
University, Tianjin, 300071, P. R. China

### Contents

|                                                                                                                                                                          |     |
|--------------------------------------------------------------------------------------------------------------------------------------------------------------------------|-----|
| 1. Table of Contents.....                                                                                                                                                | S1  |
| 2. Spectral Copies of <sup>1</sup> H and <sup>13</sup> C NMR of Compounds Obtained in this Study.....                                                                    | S2  |
| 3. Fig. S1 Optimized geometries of the intermediates 7 with diphenyl-acetylene a.....                                                                                    | S5  |
| 4. Fig. S2 Optimized geometries of the intermediates 10 and the intermediates 12 with<br>diphenyl-acetylene a.....                                                       | S5  |
| 5. Fig. S3 Optimized geometries of isomers of the reductive elimination transition states with<br>diphenyl-acetylene a.....                                              | S6  |
| 6. Fig. S4 Optimized geometries of the alkyne insertion and reductive elimination transition<br>states with diphenyl-acetylene a and 2-di(dimethylamino)acetylene b..... | S7  |
| 7. Fig. S5 Optimized geometries of the isomers of the alkyne insertion transition states with<br>diphenyl-acetylene a and their relative Gibbs free energies.....        | S8  |
| 8. Absolute Calculation Energies, Enthalpies, and Free Energies.....                                                                                                     | S9  |
| 9. The Cartesian Coordinates of the Stationary Points Discussed in the<br>Text.....                                                                                      | S13 |



# Spectral Copies of $^1\text{H}$ and $^{13}\text{C}$ NMR of Compounds Obtained in this Study

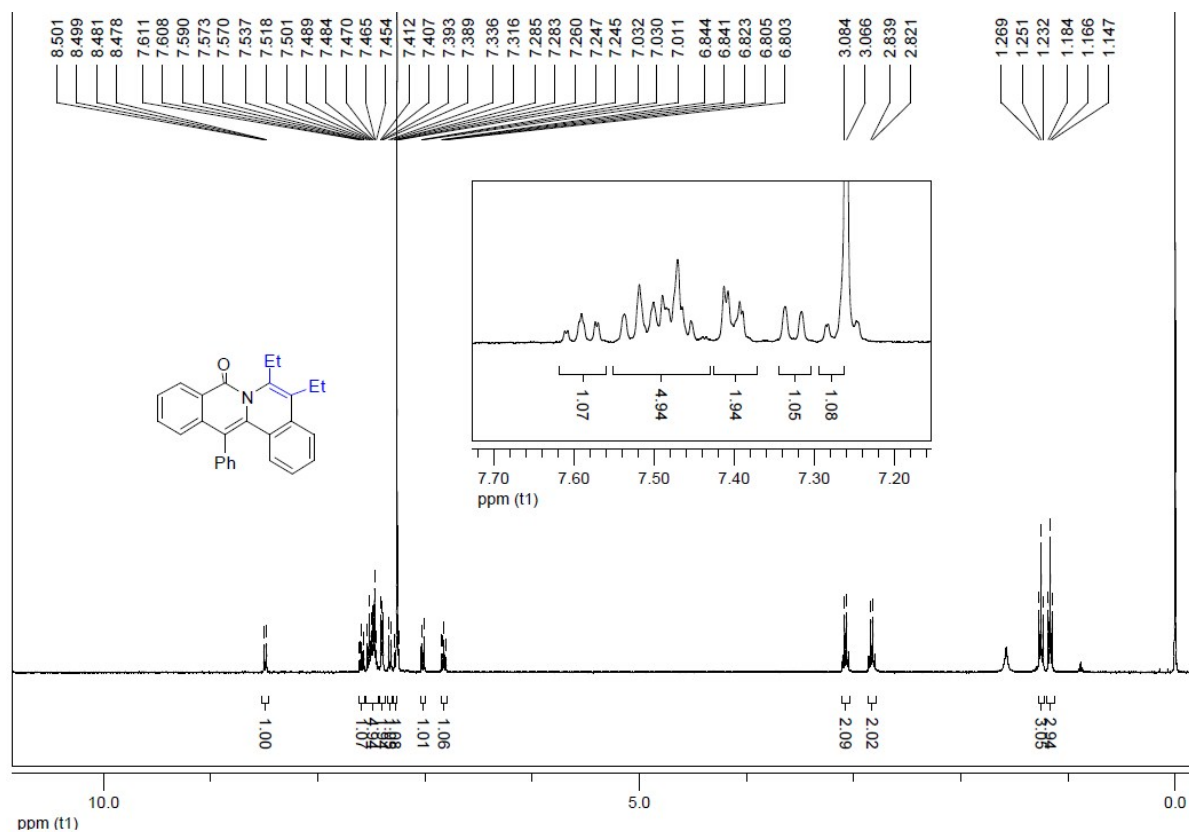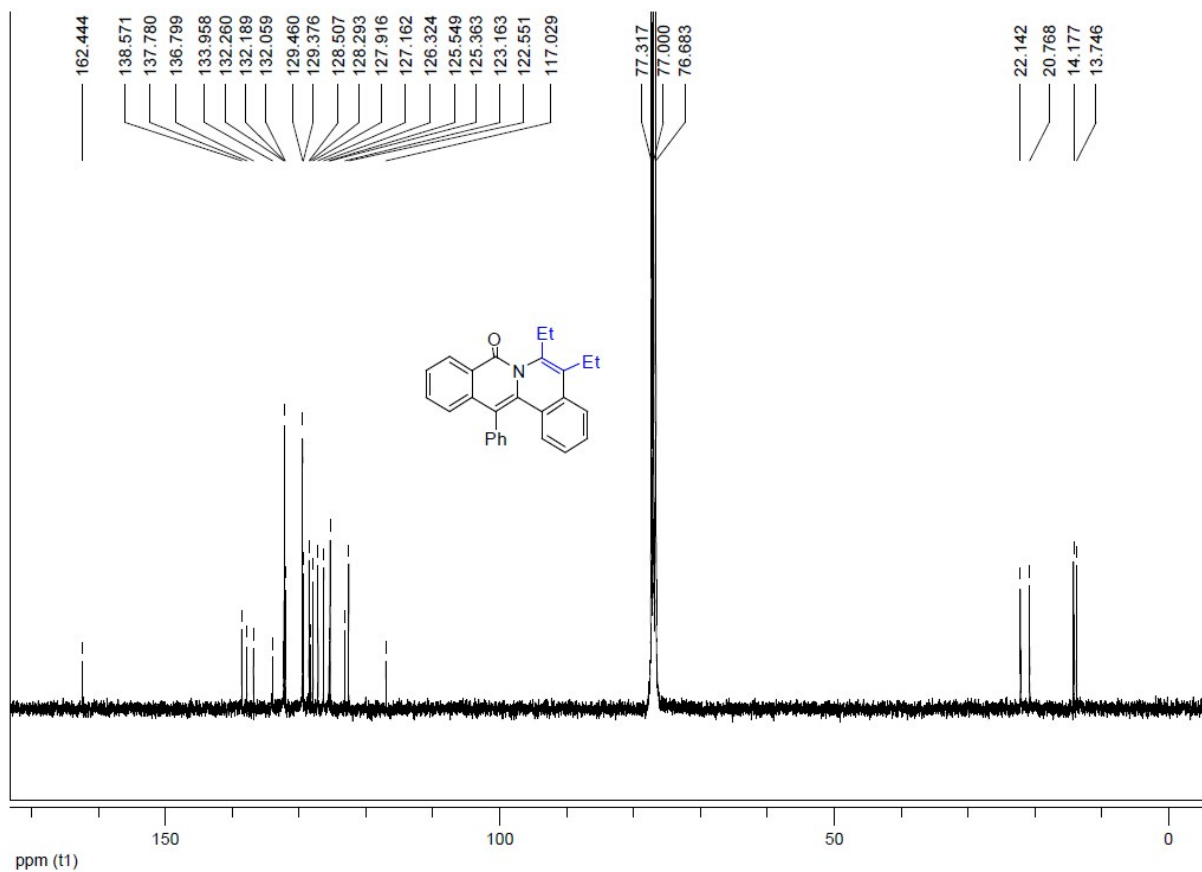

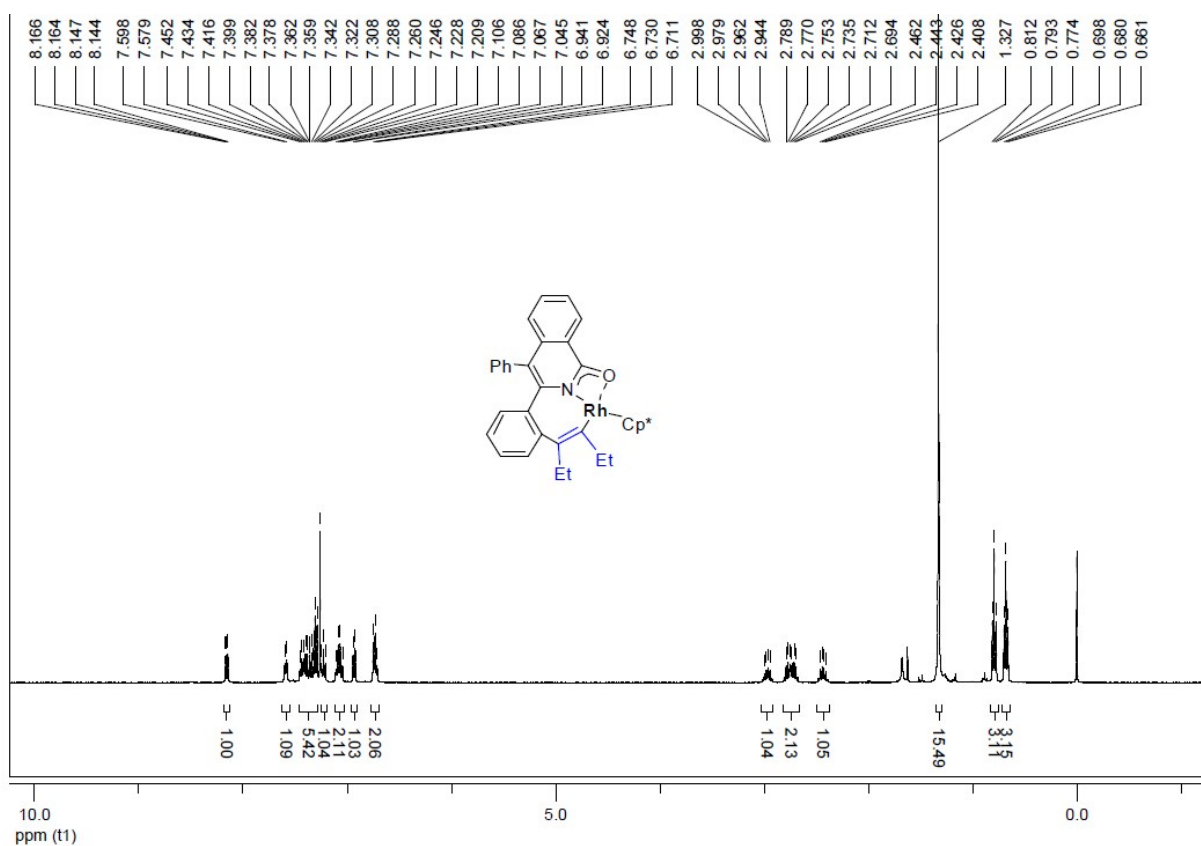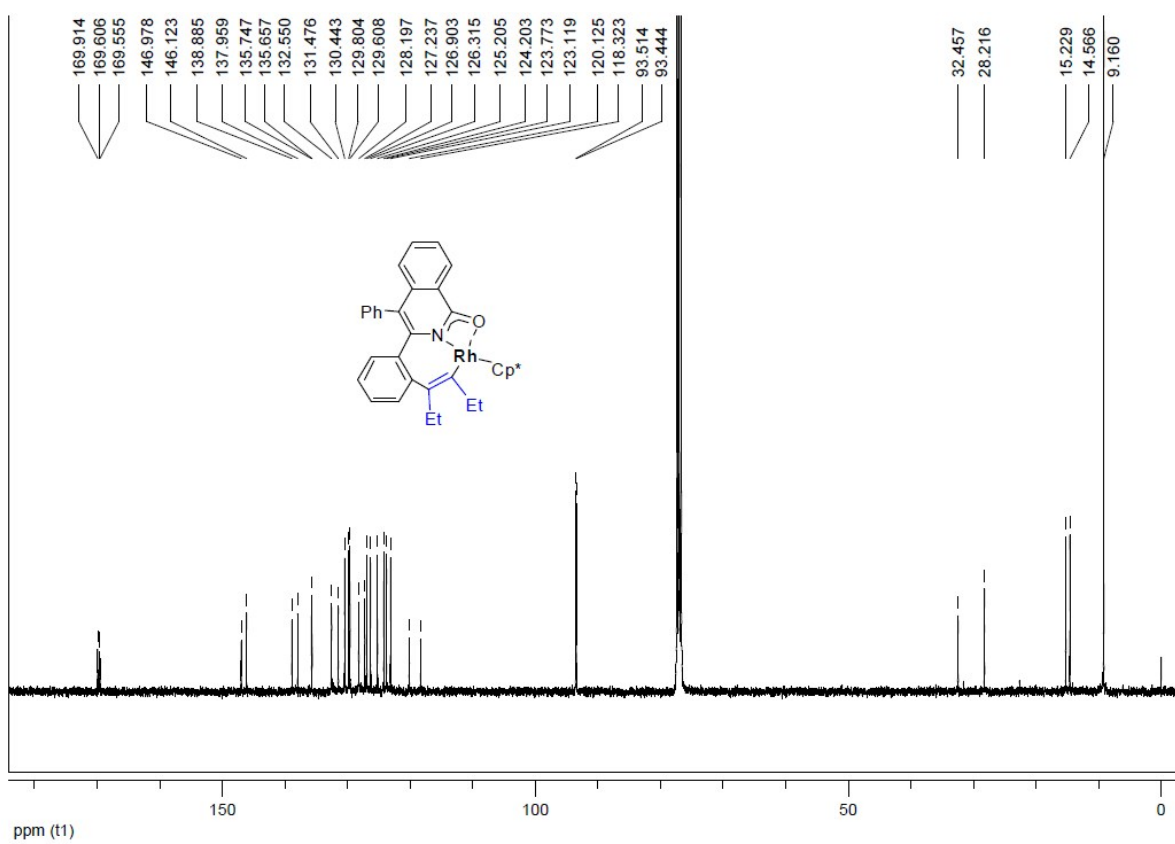

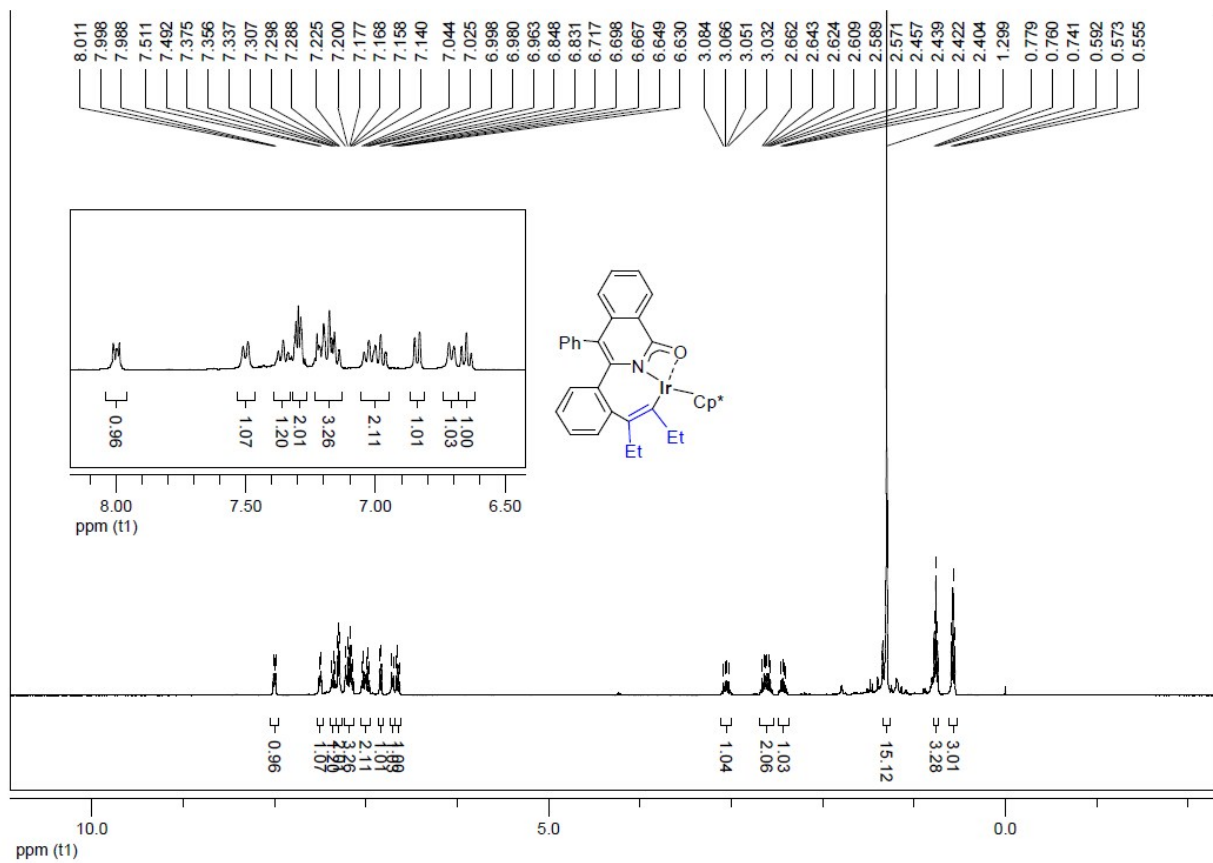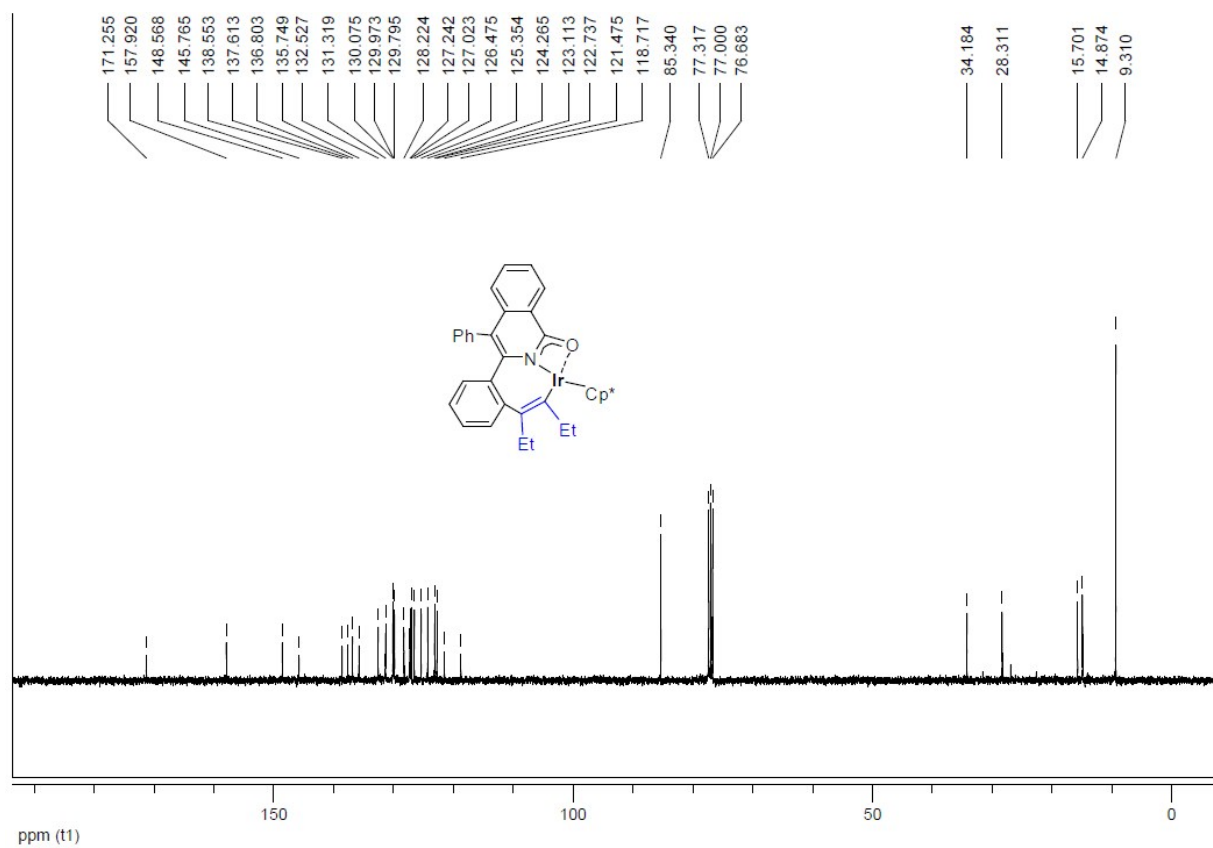

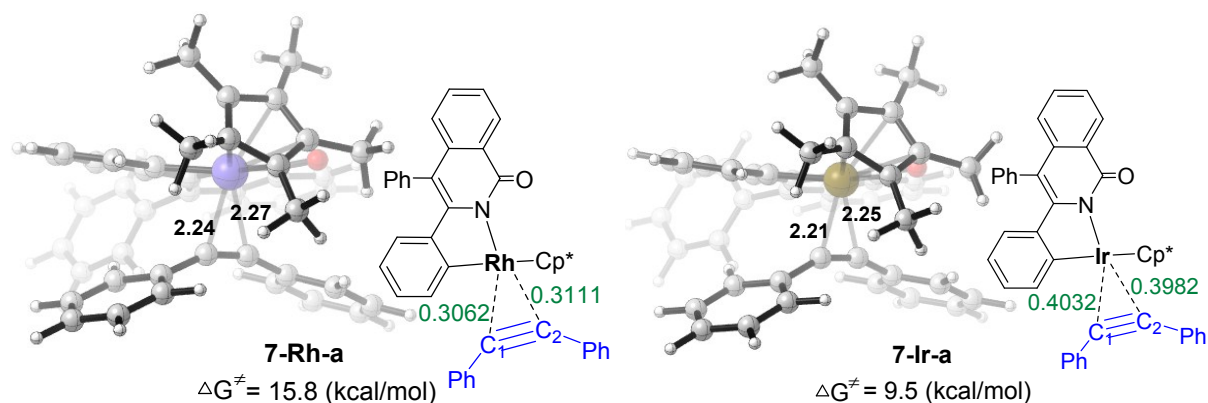

**Fig. S1** Optimized geometries of the intermediates **7** with diphenyl-acetylene **a**. Numbers in black are distances (Å) between atoms, numbers in green are Wiberg bond indexes. All energies are with respect to the substrate and the active catalyst.

The binding of diphenyl-acetylene **a** to the metal center in the intermediate **7-Ir-a** is stronger than in **7-Rh-a** as demonstrated by the relative energies of the two species and the Wiberg bond indexes of M-C<sub>1</sub> and M-C<sub>2</sub> as shown in Fig. S1. As a result, the Ir-C<sub>2</sub> bond will be formed more easily than the Rh-C<sub>2</sub> bond in the alkyne insertion step.

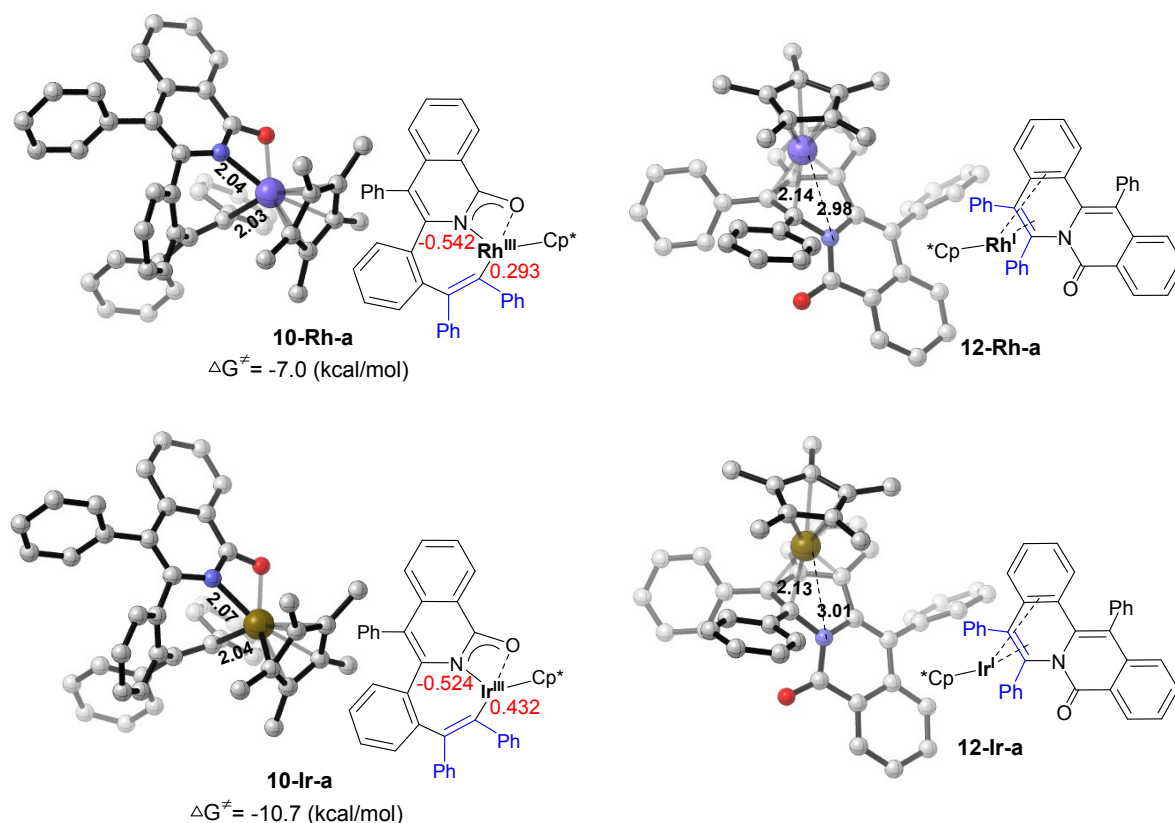

**Fig. S2** Optimized geometries of the intermediates **10** and the intermediates **12** with diphenyl-acetylene **a**. Numbers in black are distances (Å) between atoms, numbers in red are NBO charges. All energies are with respect to the substrate and the active catalyst.

NBO charges (numbers in red as shown in Fig. S2) indicate that the Ir center was more positively charged than the Rh center in the **10-M-a** (M = Rh, Ir), which resulted in the

stronger electrostatic interactions between Ir and N relative to that between Rh and N. This may be one of the reasons why the intermediate **10-Ir-a** was more stable than the intermediate **10-Rh-a** by 3.7 kcal/mol. As shown in Fig. S2, obviously, the M-N bond (M = Rh, Ir) has been broken when the intermediate **10-M-a** undergoes reductive elimination to form the intermediate **12-M-a** (M = Rh, Ir). The Ir-N bond is more difficult to be broken than the Rh-N bond due to the stronger electrostatic interactions between Ir and N, which may be one of the reasons for the higher activation energy of the reductive elimination step in the reaction with  $[\text{Cp}^*\text{IrCl}_2]_2$  than with  $[\text{Cp}^*\text{RhCl}_2]_2$ .

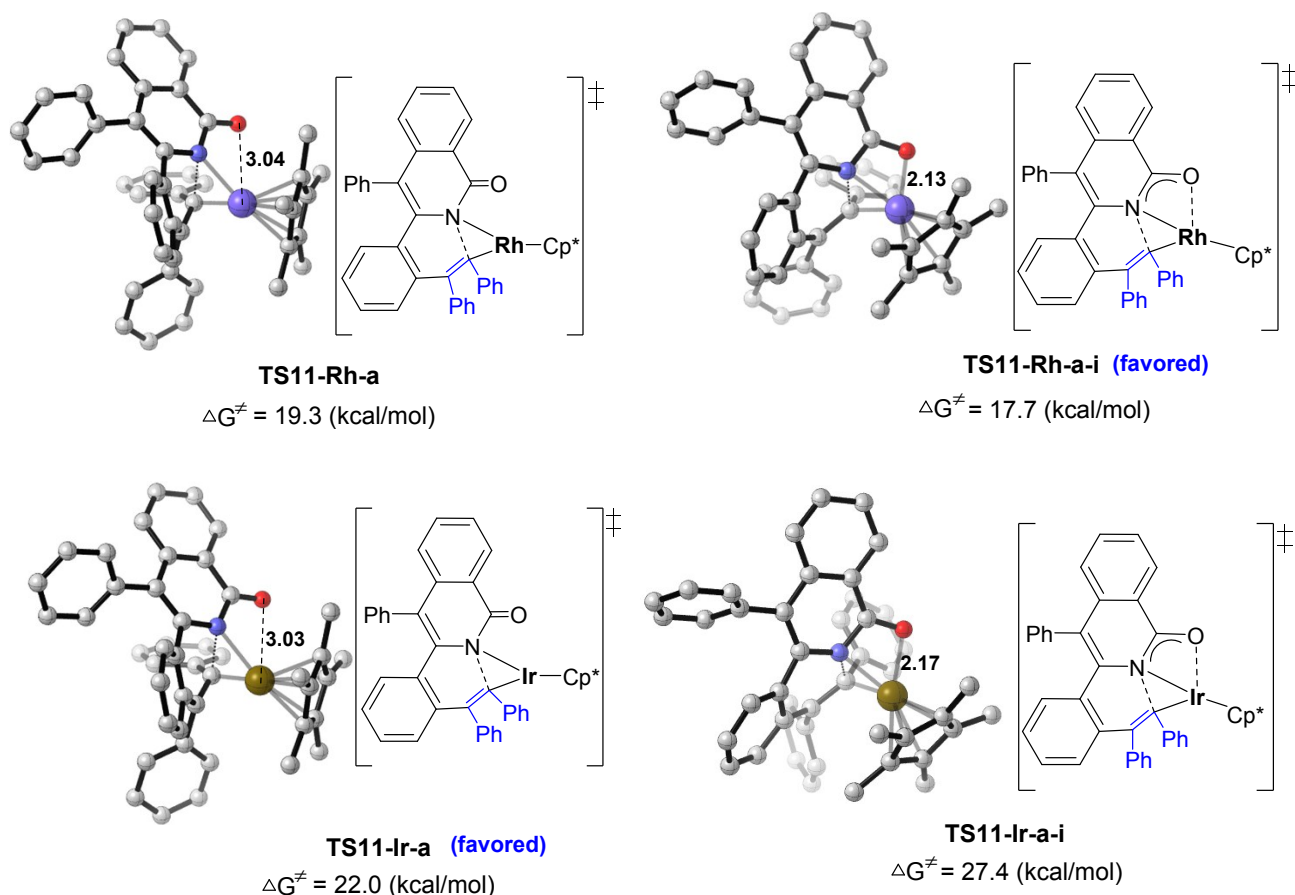

**Fig. S3** Optimized geometries of isomers of the reductive elimination transition states with diphenyl-acetylene **a**. Numbers in black are distances (Å) between atoms. All energies are with respect to the substrate and the active catalyst.

Wang's group experimentally observed two types of molecular structures for the alkyne-insertion intermediate: one contains a seven-membered metallocycle without the formation of M–O bonds (M = Rh, Ir) (intermediate **9** in Scheme 2) and the other one contains a seven-membered metallocycle with the formation of M–O bonds (M = Rh, Ir) (intermediate **10** in Scheme 2). Correspondingly, we considered two geometries of the reductive elimination transition states, **TS11-M-a** and **TS11-M-a-i** (M = Rh, Ir) as shown in Fig. S3. **TS11-M-a** contains a seven-membered metallocycle without the formation of M–O bonds (M = Rh, Ir), while **TS11-M-a-i** contains a seven-membered metallocycle with the formation of M–O bonds (M = Rh, Ir). Perhaps it is because the Rh(III) center is less electron-rich than the Ir(III)



center, the transition state **TS<sub>11</sub>-Rh-a-i** contains a seven-membered metallocycle with the formation of Rh–O bond is favored, while the transition state **TS<sub>11</sub>-Ir-a** contains a seven-membered metallocycle without the formation of Ir–O bond is favored.

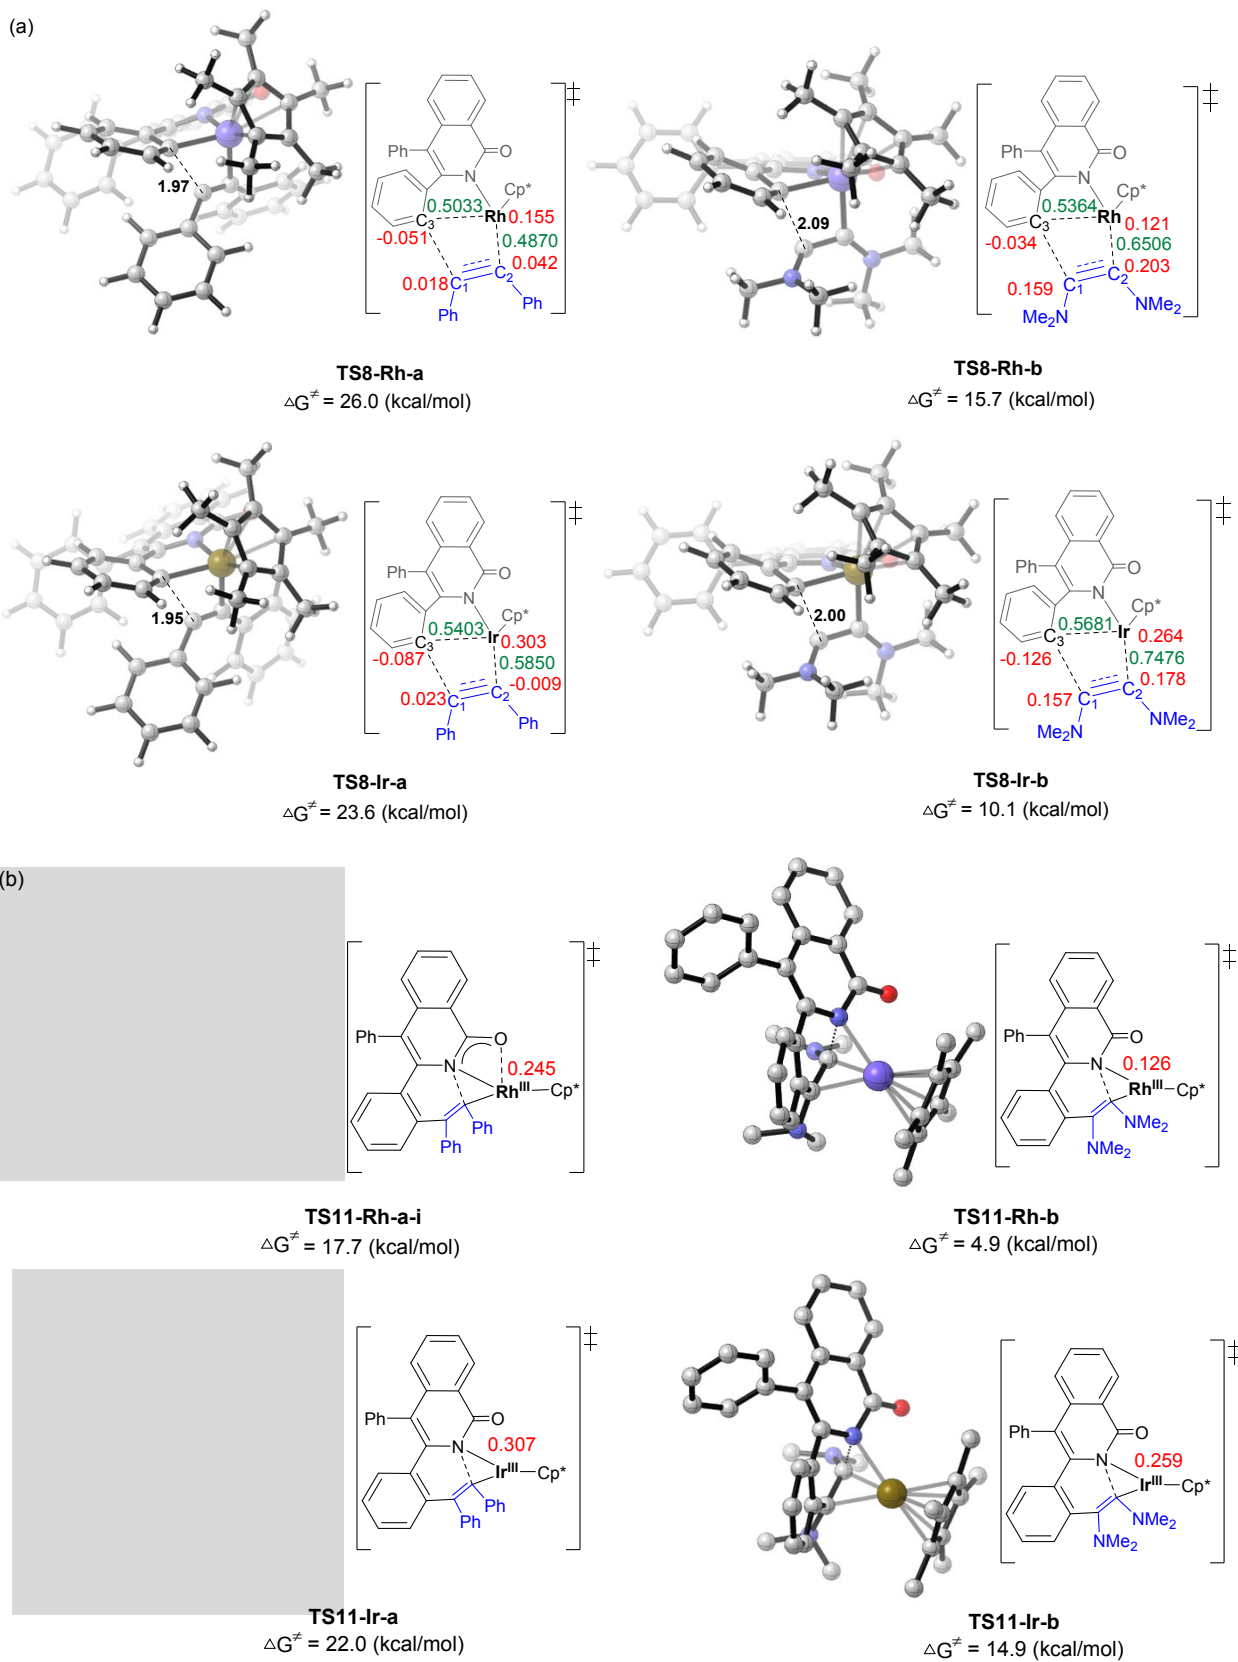



**Fig. S4** Optimized geometries of the alkyne insertion and reductive elimination transition states with diphenyl-acetylene **a** and 2-di(dimethylamino)acetylene **b**. Numbers in red are NBO charges, numbers in green are Wiberg bond indexes. All energies are with respect to the substrate and the active catalyst.

The bonds M–C<sub>2</sub> and M–C<sub>3</sub> in the alkyne insertion transition states **TS8-M-b** are stronger than those in the **TS8-M-a** (M = Rh, Ir) as demonstrated by the Wiberg bond indexes of M–C<sub>2</sub> and M–C<sub>3</sub> as shown in Fig. S4a. Meanwhile, the electrostatic interactions between atoms C<sub>1</sub> and C<sub>3</sub> are greater in **TS8-M-b** than in the **TS8-M-a** as evidenced by the charge distribution (numbers in red as shown in Fig. S4a). Therefore, the alkyne insertion transition states **TS8-M-b** involving the 1,2-di(dimethylamino)acetylene **b** are more stable than the alkyne insertion transition states **TS8-M-a** involving the diphenyl-acetylene **a** and thus the electron-donating dimethylamino group NMe<sub>2</sub> lowers the energy barriers of the alkyne insertion.

The electron-rich 1,2-di(dimethylamino)acetylene substrate stabilizes the positive charge on the metal center M(III) (M = Rh, Ir) in the reductive elimination transition states (**TS11-M-b**) and lowers the energy barrier. As expected, the metal center in **TS11-M-b** is less positively charged than that in the transition state with the diphenyl-acetylene substrate (**TS11-M-a**) (Fig. S4b).

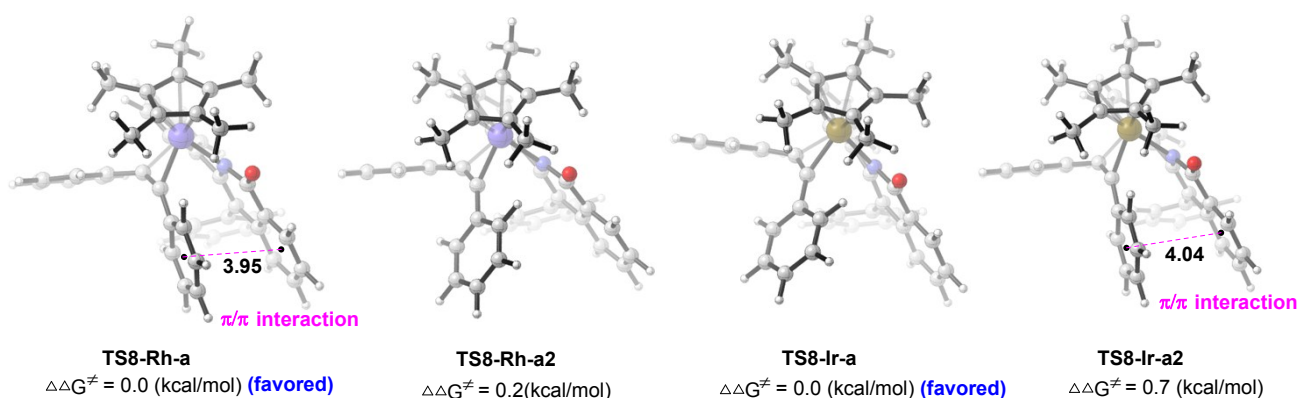

**Fig. S5** Optimized geometries of the isomers of the alkyne insertion transition states with diphenyl-acetylene **a** and their relative Gibbs free energies.

Fig. S5 shows that the Gibbs free energy of **TS8-Rh-a** which has a  $\pi/\pi$  interaction between the phenyl group at the diphenylisoquinolinone and the phenyl substituent at the alkyne is only 0.2 kcal/mol lower than that of **TS8-Rh-a2** which does not have  $\pi/\pi$  interactions. On the other hand, the Gibbs free energy of **TS8-Ir-a** which does not have  $\pi/\pi$  interactions between the phenyl groups of the two substrates is 0.7 kcal/mol lower than that of **TS8-Ir-a2** which has a  $\pi/\pi$  interaction between the phenyl groups of the two substrates. These results indicate that  $\pi/\pi$  interactions has little effect on stabilizing the alkyne insertion transition states and therefore is not one of the factors for lowering the energy barriers of alkyne insertion with diphenyl-acetylene **a**.

## Table of energy values

**Table S1: The M11-L/SDD-6-31G(d)/SMD(*o*-xylene) computed energies, enthalpies, free energies of all stationary points discussed in the text<sup>1</sup>.**

| species                                | E0           | E0+ZPE       | D3        | U            | H            | G            |
|----------------------------------------|--------------|--------------|-----------|--------------|--------------|--------------|
| <b>Cp*Rh(OAc)<sub>2</sub></b>          | -957.648904  | -957.327903  | -0.008679 | -957.298427  | -957.297182  | -957.417845  |
| <b>Cp*Ir(OAc)<sub>2</sub></b>          | -951.429230  | -951.107437  | -0.008786 | -951.078223  | -951.076978  | -951.196963  |
| <b>a</b>                               | -539.316445  | -539.129726  | -0.002438 | -539.113087  | -539.111842  | -539.189390  |
| <b>b</b>                               | -345.151630  | -344.980712  | -0.001617 | -344.965277  | -344.964032  | -345.036130  |
| <b>c</b>                               | -234.534495  | -234.395216  | -0.000908 | -234.383372  | -234.382127  | -234.443314  |
| <b>Cu<sub>2</sub>(OAc)<sub>2</sub></b> | -852.095029  | -851.991062  | -0.001594 | -851.973582  | -851.972337  | -852.052004  |
| <b>Cu<sub>2</sub>(OAc)<sub>4</sub></b> | -1308.917285 | -1308.709663 | -0.005633 | -1308.681083 | -1308.679838 | -1308.790649 |
| <b>AcOH</b>                            | -229.007487  | -228.947208  | -0.000285 | -228.940299  | -228.939054  | -228.986273  |
| <b>1</b>                               | -939.036373  | -938.740434  | -0.007822 | -938.718138  | -938.716893  | -938.817442  |
| <b>2-Rh</b>                            | -1896.692810 | -1896.072391 | -0.024504 | -1896.026919 | -1896.025674 | -1896.214639 |
| <b>2-Ir</b>                            | -1890.473407 | -1889.852101 | -0.024840 | -1889.807285 | -1889.806040 | -1889.993187 |
| <b>TS3-Rh</b>                          | -1896.677885 | -1896.062993 | -0.024993 | -1896.018435 | -1896.017190 | -1896.206338 |
| <b>TS3-Ir</b>                          | -1890.459299 | -1889.843406 | -0.024883 | -1889.798926 | -1889.797681 | -1889.984795 |
| <b>4-Rh</b>                            | -1667.657346 | -1667.100230 | -0.021828 | -1667.061073 | -1667.059828 | -1667.228732 |
| <b>4-Ir</b>                            | -1661.438167 | -1660.880723 | -0.022136 | -1660.841868 | -1660.840623 | -1661.007129 |
| <b>TS5-Rh</b>                          | -1667.627880 | -1667.076666 | -0.021493 | -1667.037531 | -1667.036285 | -1667.202208 |
| <b>TS5-Ir</b>                          | -1661.408304 | -1660.856566 | -0.021675 | -1660.817597 | -1660.816352 | -1660.982354 |
| <b>6-Rh</b>                            | -1667.651597 | -1667.094625 | -0.021989 | -1667.055512 | -1667.054267 | -1667.220330 |
| <b>6-Ir</b>                            | -1661.432751 | -1660.876610 | -0.022112 | -1660.836990 | -1660.835745 | -1661.005406 |
| <b>7-Rh-a</b>                          | -1977.948581 | -1977.266387 | -0.031494 | -1977.224451 | -1977.223206 | -1977.413279 |
| <b>7-Rh-b</b>                          | -1783.813308 | -1783.144647 | -0.028005 | -1783.102567 | -1783.101322 | -1783.284996 |
| <b>7-Rh-c</b>                          | -1673.170035 | -1672.535517 | -0.024604 | -1672.493148 | -1672.491903 | -1672.671999 |
| <b>7-Ir-a</b>                          | -1971.734700 | -1971.051718 | -0.031419 | -1971.009779 | -1971.008534 | -1971.201726 |
| <b>7-Ir-b</b>                          | -1777.603653 | -1776.935367 | -0.028226 | -1776.893114 | -1776.891869 | -1777.078135 |
| <b>7-Ir-c</b>                          | -1666.958501 | -1666.324039 | -0.024765 | -1666.281786 | -1666.280541 | -1666.463166 |
| <b>TS8-Rh-a</b>                        | -1977.931494 | -1977.249813 | -0.031791 | -1977.209173 | -1977.207928 | -1977.397199 |
| <b>TS8-Rh-b</b>                        | -1783.796186 | -1783.128157 | -0.027868 | -1783.086965 | -1783.085720 | -1783.266286 |
| <b>TS8-Rh-c</b>                        | -1673.150899 | -1672.516717 | -0.025809 | -1672.476877 | -1672.475632 | -1672.650362 |
| <b>TS8-Ir-a</b>                        | -1971.713405 | -1971.032061 | -0.030474 | -1970.989915 | -1970.988670 | -1971.180238 |
| <b>TS8-Ir-b</b>                        | -1777.582911 | -1776.915010 | -0.028099 | -1776.873988 | -1776.872743 | -1777.053652 |
| <b>TS8-Ir-c</b>                        | -1666.930831 | -1666.296775 | -0.026013 | -1666.257173 | -1666.255928 | -1666.430535 |
| <b>9-Rh-a</b>                          | -1977.984104 | -1977.299296 | -0.030260 | -1977.257071 | -1977.255826 | -1977.446552 |
| <b>9-Rh-b</b>                          | -1783.826473 | -1783.156415 | -0.028451 | -1783.115757 | -1783.114512 | -1783.295055 |
| <b>9-Rh-c</b>                          | -1673.199876 | -1672.562951 | -0.026013 | -1672.523472 | -1672.522227 | -1672.697130 |
| <b>9-Ir-a</b>                          | -1971.765642 | -1971.081108 | -0.030678 | -1971.039299 | -1971.038054 | -1971.229310 |
| <b>9-Ir-b</b>                          | -1777.608046 | -1776.937444 | -0.028807 | -1776.897301 | -1776.896056 | -1777.075349 |
| <b>9-Ir-c</b>                          | -1666.982026 | -1666.344994 | -0.026062 | -1666.305616 | -1666.304371 | -1666.478566 |
| <b>10-Rh-a</b>                         | -1977.990280 | -1977.306570 | -0.030480 | -1977.264921 | -1977.263676 | -1977.452487 |

|                    |              |              |           |              |              |              |
|--------------------|--------------|--------------|-----------|--------------|--------------|--------------|
| <b>10-Rh-b</b>     | -1783.833823 | -1783.163543 | -0.027981 | -1783.122794 | -1783.121549 | -1783.302732 |
| <b>10-Rh-c</b>     | -1673.206707 | -1672.568530 | -0.025522 | -1672.528756 | -1672.527511 | -1672.703204 |
| <b>10-Ir-a</b>     | -1971.773499 | -1971.088432 | -0.030609 | -1971.046851 | -1971.045606 | -1971.236705 |
| <b>10-Ir-b</b>     | -1777.616922 | -1776.946119 | -0.028198 | -1776.905826 | -1776.904581 | -1777.083918 |
| <b>10-Ir-c</b>     | -1666.992482 | -1666.354684 | -0.025782 | -1666.315240 | -1666.313995 | -1666.487896 |
| <b>TS11-Rh-a</b>   | -1977.948221 | -1977.264685 | -0.030769 | -1977.223835 | -1977.222590 | -1977.409963 |
| <b>TS11-Rh-b</b>   | -1783.817253 | -1783.148057 | -0.028344 | -1783.108141 | -1783.106896 | -1783.285718 |
| <b>TS11-Rh-c</b>   | -1673.165621 | -1672.529905 | -0.025874 | -1672.490809 | -1672.489564 | -1672.663149 |
| <b>TS11-Ir-a</b>   | -1971.719584 | -1971.036727 | -0.030898 | -1970.995850 | -1970.994605 | -1971.183859 |
| <b>TS11-Ir-b</b>   | -1777.578761 | -1776.909661 | -0.028602 | -1776.869842 | -1776.868597 | -1777.047331 |
| <b>TS11-Ir-c</b>   | -1666.938138 | -1666.301818 | -0.025534 | -1666.262671 | -1666.261426 | -1666.433905 |
| <b>TS11-Rh-a-i</b> | -1977.949110 | -1977.267002 | -0.030179 | -1977.225485 | -1977.224240 | -1977.413123 |
| <b>TS11-Rh-b-i</b> | -1783.804343 | -1783.135468 | -0.027785 | -1783.095104 | -1783.093859 | -1783.271691 |
| <b>TS11-Rh-c-i</b> | -1673.166230 | -1672.528903 | -0.025169 | -1672.489842 | -1672.488597 | -1672.659571 |
| <b>TS11-Ir-a-i</b> | -1971.711711 | -1971.029509 | -0.030303 | -1970.987913 | -1970.986668 | -1971.175007 |
| <b>TS11-Ir-b-i</b> | -1777.571893 | -1776.903543 | -0.027675 | -1776.862925 | -1776.861680 | -1777.040634 |
| <b>TS11-Ir-c-i</b> | -1666.934564 | -1666.297423 | -0.025215 | -1666.258432 | -1666.257187 | -1666.426784 |
| <b>12-Rh-a</b>     | -1977.992435 | -1977.306009 | -0.030470 | -1977.265465 | -1977.264220 | -1977.448014 |
| <b>12-Rh-b</b>     | -1783.831928 | -1783.160758 | -0.028220 | -1783.120987 | -1783.119742 | -1783.296639 |
| <b>12-Rh-c</b>     | -1673.208778 | -1672.569467 | -0.025572 | -1672.530467 | -1672.529222 | -1672.702660 |
| <b>12-Ir-a</b>     | -1971.764368 | -1971.078084 | -0.030598 | -1971.037476 | -1971.036231 | -1971.220834 |
| <b>12-Ir-b</b>     | -1777.601578 | -1776.931284 | -0.028274 | -1776.891084 | -1776.889839 | -1777.069021 |
| <b>12-Ir-c</b>     | -1666.979361 | -1666.340843 | -0.025765 | -1666.301896 | -1666.300651 | -1666.472781 |
| <b>product-a</b>   | -1477.191297 | -1476.724757 | -0.016147 | -1476.692847 | -1476.691602 | -1476.830041 |
| <b>product-b</b>   | -1283.039372 | -1282.588268 | -0.014290 | -1282.557433 | -1282.556188 | -1282.686851 |
| <b>product-c</b>   | -1172.418079 | -1171.996725 | -0.012486 | -1171.968680 | -1171.967435 | -1172.087912 |

<sup>1</sup> E<sub>0</sub> is the electronic energy calculated by using M11-L/SDD-6-31G(d)/SMD(*o*-xylene). ZPE is the Zero-point vibrational energy. D<sub>3</sub> is the dispersion correction calculated for Mo6 functional with zero-damping. U, H and G are the thermal energy, enthalpy and Gibbs free energy obtained by adding the DFT-D<sub>3</sub> dispersion corrections and the thermal corrections (at 393.15 K) from frequency calculations to E<sub>0</sub>. All energies are in hartree.

**Table S2: The M11-L/SDD-6-311+G(d,p)/SMD(*o*-xylene)//M11-L/SDD-6-31G(d)/SMD(*o*-xylene) computed energies, enthalpies, free energies of all stationary points discussed in the text<sup>1</sup>.**

| species                       | E <sub>0</sub> | E <sub>0</sub> +ZPE | D <sub>3</sub> | U           | H           | G           |
|-------------------------------|----------------|---------------------|----------------|-------------|-------------|-------------|
| <b>Cp*Rh(OAc)<sub>2</sub></b> | -957.947103    | -957.626102         | -0.008679      | -957.596626 | -957.595381 | -957.716044 |
| <b>Cp*Ir(OAc)<sub>2</sub></b> | -951.728801    | -951.407008         | -0.008786      | -951.377794 | -951.376549 | -951.496534 |
| <b>a</b>                      | -539.484458    | -539.297739         | -0.002438      | -539.281100 | -539.279855 | -539.357403 |
| <b>b</b>                      | -345.275721    | -345.104803         | -0.001617      | -345.089368 | -345.088123 | -345.160221 |
| <b>c</b>                      | -234.618900    | -234.479621         | -0.000908      | -234.467777 | -234.466532 | -234.527719 |

|                                        |              |              |           |              |              |              |
|----------------------------------------|--------------|--------------|-----------|--------------|--------------|--------------|
| <b>Cu<sub>2</sub>(OAc)<sub>2</sub></b> | -852.257864  | -852.153897  | -0.001594 | -852.136416  | -852.135171  | -852.214838  |
| <b>Cu<sub>2</sub>(OAc)<sub>4</sub></b> | -1309.245456 | -1309.037834 | -0.005633 | -1309.009254 | -1309.008009 | -1309.118820 |
| <b>AcOH</b>                            | -229.100861  | -229.040582  | -0.000285 | -229.033673  | -229.032428  | -229.079647  |
| <b>1</b>                               | -939.334352  | -939.038413  | -0.007822 | -939.016117  | -939.014872  | -939.115421  |
| <b>2-Rh</b>                            | -1897.288099 | -1896.667680 | -0.024504 | -1896.622208 | -1896.620963 | -1896.809928 |
| <b>2-Ir</b>                            | -1891.070145 | -1890.448839 | -0.024840 | -1890.404023 | -1890.402778 | -1890.589925 |
| <b>TS3-Rh</b>                          | -1897.274721 | -1896.659829 | -0.024993 | -1896.615271 | -1896.614026 | -1896.803174 |
| <b>TS3-Ir</b>                          | -1891.057830 | -1890.441937 | -0.024883 | -1890.397457 | -1890.396212 | -1890.583326 |
| <b>4-Rh</b>                            | -1668.165455 | -1667.608339 | -0.021828 | -1667.569182 | -1667.567937 | -1667.736841 |
| <b>4-Ir</b>                            | -1661.947807 | -1661.390363 | -0.022136 | -1661.351508 | -1661.350263 | -1661.516769 |
| <b>TS5-Rh</b>                          | -1668.139112 | -1667.587898 | -0.021493 | -1667.548763 | -1667.547517 | -1667.713440 |
| <b>TS5-Ir</b>                          | -1661.921344 | -1661.369606 | -0.021675 | -1661.330636 | -1661.329391 | -1661.495393 |
| <b>6-Rh</b>                            | -1668.163130 | -1667.606158 | -0.021989 | -1667.567044 | -1667.565799 | -1667.731862 |
| <b>6-Ir</b>                            | -1661.946007 | -1661.389866 | -0.022112 | -1661.350246 | -1661.349001 | -1661.518662 |
| <b>7-Rh-a</b>                          | -1978.539675 | -1977.857481 | -0.031494 | -1977.815545 | -1977.814300 | -1978.004373 |
| <b>7-Rh-b</b>                          | -1784.354741 | -1783.686080 | -0.028005 | -1783.644000 | -1783.642755 | -1783.826429 |
| <b>7-Rh-c</b>                          | -1673.674562 | -1673.040044 | -0.024604 | -1672.997675 | -1672.996430 | -1673.176526 |
| <b>7-Ir-a</b>                          | -1972.327826 | -1971.644844 | -0.031419 | -1971.602906 | -1971.601661 | -1971.794853 |
| <b>7-Ir-b</b>                          | -1778.146848 | -1777.478562 | -0.028226 | -1777.436309 | -1777.435064 | -1777.621330 |
| <b>7-Ir-c</b>                          | -1667.464949 | -1666.830487 | -0.024765 | -1666.788234 | -1666.786989 | -1666.969614 |
| <b>TS8-Rh-a</b>                        | -1978.522484 | -1977.840803 | -0.031791 | -1977.800163 | -1977.798918 | -1977.988189 |
| <b>TS8-Rh-b</b>                        | -1784.337257 | -1783.669228 | -0.027868 | -1783.628036 | -1783.626791 | -1783.807357 |
| <b>TS8-Rh-c</b>                        | -1673.654934 | -1673.020752 | -0.025809 | -1672.980912 | -1672.979667 | -1673.154397 |
| <b>TS8-Ir-a</b>                        | -1972.305683 | -1971.624339 | -0.030474 | -1971.582192 | -1971.580947 | -1971.772515 |
| <b>TS8-Ir-b</b>                        | -1778.126107 | -1777.458206 | -0.028099 | -1777.417184 | -1777.415939 | -1777.596848 |
| <b>TS8-Ir-c</b>                        | -1667.437215 | -1666.803159 | -0.026013 | -1666.763556 | -1666.762311 | -1666.936918 |
| <b>9-Rh-a</b>                          | -1978.573304 | -1977.888496 | -0.030260 | -1977.846270 | -1977.845025 | -1978.035751 |
| <b>9-Rh-b</b>                          | -1784.366723 | -1783.696665 | -0.028451 | -1783.656007 | -1783.654762 | -1783.835305 |
| <b>9-Rh-c</b>                          | -1673.702876 | -1673.065951 | -0.026013 | -1673.026472 | -1673.025227 | -1673.200130 |
| <b>9-Ir-a</b>                          | -1972.356942 | -1971.672408 | -0.030678 | -1971.630599 | -1971.629354 | -1971.820610 |
| <b>9-Ir-b</b>                          | -1778.150252 | -1777.479650 | -0.028807 | -1777.439506 | -1777.438261 | -1777.617554 |
| <b>9-Ir-c</b>                          | -1667.486995 | -1666.849963 | -0.026062 | -1666.810584 | -1666.809339 | -1666.983534 |
| <b>10-Rh-a</b>                         | -1978.578599 | -1977.894889 | -0.030480 | -1977.853240 | -1977.851995 | -1978.040806 |
| <b>10-Rh-b</b>                         | -1784.372222 | -1783.701942 | -0.027981 | -1783.661193 | -1783.659948 | -1783.841131 |
| <b>10-Rh-c</b>                         | -1673.708113 | -1673.069936 | -0.025522 | -1673.030162 | -1673.028917 | -1673.204610 |
| <b>10-Ir-a</b>                         | -1972.363891 | -1971.678824 | -0.030609 | -1971.637242 | -1971.635997 | -1971.827096 |
| <b>10-Ir-b</b>                         | -1778.157069 | -1777.486266 | -0.028198 | -1777.445973 | -1777.444728 | -1777.624065 |
| <b>10-Ir-c</b>                         | -1667.495301 | -1666.857503 | -0.025782 | -1666.818059 | -1666.816814 | -1666.990715 |
| <b>TS11-Rh-a</b>                       | -1978.537080 | -1977.853544 | -0.030769 | -1977.812694 | -1977.811449 | -1977.998822 |
| <b>TS11-Rh-b</b>                       | -1784.356166 | -1783.686970 | -0.028344 | -1783.647055 | -1783.645810 | -1783.824632 |
| <b>TS11-Rh-c</b>                       | -1673.668806 | -1673.033090 | -0.025874 | -1672.993994 | -1672.992749 | -1673.166334 |
| <b>TS11-Ir-a</b>                       | -1972.310804 | -1971.627947 | -0.030898 | -1971.587070 | -1971.585825 | -1971.775079 |
| <b>TS11-Ir-b</b>                       | -1778.120635 | -1777.451535 | -0.028602 | -1777.411716 | -1777.410471 | -1777.589205 |

|                    |              |              |           |              |              |              |
|--------------------|--------------|--------------|-----------|--------------|--------------|--------------|
| <b>TS11-Ir-c</b>   | -1667.443639 | -1666.807319 | -0.025534 | -1666.768173 | -1666.766928 | -1666.939407 |
| <b>TS11-Rh-a-i</b> | -1978.537360 | -1977.855252 | -0.030179 | -1977.813734 | -1977.812489 | -1978.001372 |
| <b>TS11-Rh-b-i</b> | -1784.342454 | -1783.673579 | -0.027785 | -1783.633215 | -1783.631970 | -1783.809802 |
| <b>TS11-Rh-c-i</b> | -1673.667336 | -1673.030009 | -0.025169 | -1672.990948 | -1672.989703 | -1673.160677 |
| <b>TS11-Ir-a-i</b> | -1972.303062 | -1971.620860 | -0.030303 | -1971.579265 | -1971.578020 | -1971.766359 |
| <b>TS11-Ir-b-i</b> | -1778.112963 | -1777.444613 | -0.027675 | -1777.403996 | -1777.402751 | -1777.581705 |
| <b>TS11-Ir-c-i</b> | -1667.438567 | -1666.801426 | -0.025215 | -1666.762436 | -1666.761191 | -1666.930788 |
| <b>12-Rh-a</b>     | -1978.582564 | -1977.896138 | -0.030470 | -1977.855594 | -1977.854349 | -1978.038143 |
| <b>12-Rh-b</b>     | -1784.372815 | -1783.701645 | -0.028220 | -1783.661875 | -1783.660630 | -1783.837527 |
| <b>12-Rh-c</b>     | -1673.712164 | -1673.072853 | -0.025572 | -1673.033853 | -1673.032608 | -1673.206046 |
| <b>12-Ir-a</b>     | -1972.357690 | -1971.671406 | -0.030598 | -1971.630799 | -1971.629554 | -1971.814157 |
| <b>12-Ir-b</b>     | -1778.145571 | -1777.475277 | -0.028274 | -1777.435077 | -1777.433832 | -1777.613014 |
| <b>12-Ir-c</b>     | -1667.485778 | -1666.847260 | -0.025765 | -1666.808313 | -1666.807068 | -1666.979198 |
| <b>product-a</b>   | -1477.649085 | -1477.182545 | -0.016147 | -1477.150635 | -1477.149390 | -1477.287829 |
| <b>product-b</b>   | -1283.447410 | -1282.996306 | -0.014290 | -1282.965471 | -1282.964226 | -1283.094889 |
| <b>product-c</b>   | -1172.788561 | -1172.367207 | -0.012486 | -1172.339161 | -1172.337916 | -1172.458393 |

<sup>1</sup> E<sub>0</sub> is the single point energy calculated by using M11-L/SDD-6-311+G(d,p)/SMD(o-xylene) based on geometries obtained by M11-L/SDD-6-31G(d)/SMD(o-xylene). ZPE is the Zero-point vibrational energy. D<sub>3</sub> is the dispersion correction calculated for Mo6 functional with zero-damping. U, H, G are the results of adding corresponding corrections the same as in Table S<sub>1</sub> to E<sub>0</sub>. All energies are in hartree.

## The Cartesian Coordinates of the stationary points discussed in the text

| <b>Cp*Rh(OAc)<sub>2</sub></b> |           |           |           | <b>Cp*Ir(OAc)<sub>2</sub></b> |           |          |           |
|-------------------------------|-----------|-----------|-----------|-------------------------------|-----------|----------|-----------|
| Atom                          | X         | Y         | Z         | Atom                          | X         | Y        | Z         |
| Rh                            | 0.018731  | 0.220695  | -0.098246 | C                             | -2.409045 | 3.321186 | 0.056483  |
| C                             | 1.299375  | -1.002734 | 1.139199  | H                             | -3.371881 | 2.944372 | -0.325320 |
| C                             | 0.953041  | -1.581030 | 2.451111  | H                             | -2.571684 | 3.689748 | 1.078359  |
| C                             | 1.178739  | -1.622047 | -0.130065 | H                             | -2.088466 | 4.141238 | -0.600770 |
| C                             | 0.637424  | -2.965152 | -0.415168 |                               |           |          |           |
| C                             | 1.645439  | -0.704723 | -1.120255 |                               |           |          |           |
| C                             | 1.734323  | -0.960891 | -2.571752 |                               |           |          |           |
| C                             | 2.139603  | 0.463793  | -0.437002 |                               |           |          |           |
| C                             | 2.715520  | 1.644541  | -1.110667 |                               |           |          |           |
| C                             | 1.912217  | 0.293520  | 0.945108  |                               |           |          |           |
| C                             | 2.238214  | 1.238603  | 2.032099  |                               |           |          |           |
| O                             | -1.754466 | -0.508553 | -0.770197 |                               |           |          |           |
| C                             | -2.340333 | -1.340812 | 0.004463  |                               |           |          |           |
| O                             | -1.903282 | -1.746602 | 1.064513  |                               |           |          |           |
| C                             | -3.685949 | -1.781921 | -0.507947 |                               |           |          |           |
| H                             | 0.257992  | -2.425003 | 2.354329  |                               |           |          |           |
| H                             | 0.474777  | -0.835478 | 3.105915  |                               |           |          |           |
| H                             | 1.865434  | -1.933129 | 2.966198  |                               |           |          |           |
| H                             | 0.051804  | -3.359518 | 0.425059  |                               |           |          |           |
| H                             | 1.466352  | -3.665034 | -0.623502 |                               |           |          |           |
| H                             | -0.012694 | -2.958896 | -1.305075 |                               |           |          |           |
| H                             | 1.676940  | -0.029384 | -3.155915 |                               |           |          |           |
| H                             | 0.924520  | -1.621741 | -2.916806 |                               |           |          |           |
| H                             | 2.691985  | -1.450829 | -2.826255 |                               |           |          |           |
| H                             | 2.123550  | 1.928225  | -1.996334 |                               |           |          |           |
| H                             | 3.741439  | 1.428835  | -1.458383 |                               |           |          |           |
| H                             | 2.764599  | 2.519334  | -0.446223 |                               |           |          |           |
| H                             | 3.181854  | 0.950570  | 2.529217  |                               |           |          |           |
| H                             | 1.453974  | 1.249710  | 2.805725  |                               |           |          |           |
| H                             | 2.357073  | 2.267763  | 1.662644  |                               |           |          |           |
| H                             | -4.422865 | -0.982294 | -0.327607 |                               |           |          |           |
| H                             | -3.666411 | -1.958040 | -1.593651 |                               |           |          |           |
| H                             | -4.025552 | -2.686273 | 0.015235  |                               |           |          |           |
| C                             | -1.421801 | 2.213541  | 0.041576  |                               |           |          |           |
| O                             | -0.746731 | 1.969839  | -0.986923 |                               |           |          |           |
| O                             | -1.257550 | 1.480230  | 1.041497  |                               |           |          |           |

|    |           |           |           |   |           |           |           |
|----|-----------|-----------|-----------|---|-----------|-----------|-----------|
| H  | -4.055981 | -2.790106 | -0.024846 | N | -1.915651 | -0.209412 | 0.215408  |
| C  | -1.571730 | 2.131581  | 0.056843  | C | -2.624833 | 0.872203  | 0.840072  |
| O  | -0.912223 | 1.894211  | -0.982798 | H | -3.654111 | 0.548148  | 1.074180  |
| O  | -1.340084 | 1.420324  | 1.061459  | H | -2.120245 | 1.150197  | 1.778248  |
| C  | -2.565071 | 3.230596  | 0.106492  | H | -2.684434 | 1.774068  | 0.192070  |
| H  | -3.435710 | 2.936811  | 0.709494  | C | -2.570236 | -0.718056 | -0.959266 |
| H  | -2.109241 | 4.106742  | 0.595796  | H | -2.033049 | -1.607278 | -1.323692 |
| H  | -2.880724 | 3.525069  | -0.902830 | H | -3.604997 | -1.008098 | -0.704062 |
| Ir | 0.018487  | 0.190850  | -0.077586 | H | -2.611071 | 0.030875  | -1.780556 |

**a**

| Atom | X         | Y         | Z         |
|------|-----------|-----------|-----------|
| C    | -0.606732 | -0.003893 | 0.000041  |
| C    | 0.606732  | 0.003891  | -0.000065 |
| C    | -2.018199 | -0.003404 | 0.000232  |
| C    | -2.730761 | -1.207728 | -0.000232 |
| C    | -2.726320 | 1.204658  | 0.000192  |
| C    | -4.111991 | -1.198351 | -0.000006 |
| H    | -2.178560 | -2.154538 | 0.000240  |
| C    | -4.107289 | 1.201342  | 0.000224  |
| H    | -2.169921 | 2.149291  | -0.000492 |
| C    | -4.805210 | 0.003242  | -0.000252 |
| H    | -4.659318 | -2.148445 | 0.000785  |
| H    | -4.650589 | 2.153476  | -0.000376 |
| H    | -5.901312 | 0.005047  | -0.000211 |
| C    | 2.018199  | 0.003403  | -0.000247 |
| C    | 2.730761  | 1.207727  | 0.000195  |
| C    | 2.726320  | -1.204659 | -0.000170 |
| C    | 4.111990  | 1.198352  | -0.000011 |
| H    | 2.178559  | 2.154538  | -0.000307 |
| C    | 4.107290  | -1.201341 | -0.000183 |
| H    | 2.169923  | -2.149292 | 0.000529  |
| C    | 4.805210  | -0.003240 | 0.000274  |
| H    | 4.659316  | 2.148447  | -0.000818 |
| H    | 4.650589  | -2.153474 | 0.000448  |
| H    | 5.901313  | -0.005045 | 0.000252  |

**b**

| Atom | X         | Y         | Z         |
|------|-----------|-----------|-----------|
| C    | -0.593721 | -0.068575 | 0.131186  |
| C    | 0.592926  | -0.053634 | -0.131963 |
| N    | 1.914373  | -0.178471 | -0.238640 |

|   |           |           |           |
|---|-----------|-----------|-----------|
| N | -1.915651 | -0.209412 | 0.215408  |
| C | -2.624833 | 0.872203  | 0.840072  |
| H | -3.654111 | 0.548148  | 1.074180  |
| H | -2.120245 | 1.150197  | 1.778248  |
| H | -2.684434 | 1.774068  | 0.192070  |
| C | -2.570236 | -0.718056 | -0.959266 |
| H | -2.033049 | -1.607278 | -1.323692 |
| H | -3.604997 | -1.008098 | -0.704062 |
| H | -2.611071 | 0.030875  | -1.780556 |
| C | 2.575775  | -0.834980 | 0.855223  |
| H | 2.049526  | -1.772082 | 1.093864  |
| H | 3.613688  | -1.074819 | 0.563698  |
| H | 2.608114  | -0.205209 | 1.771036  |
| C | 2.620429  | 0.975614  | -0.722359 |
| H | 3.641519  | 0.680709  | -1.022071 |
| H | 2.099177  | 1.385506  | -1.601109 |
| H | 2.702793  | 1.777729  | 0.043668  |

**c**

| Atom | X         | Y         | Z         |
|------|-----------|-----------|-----------|
| C    | 0.580012  | -0.362366 | -0.168542 |
| C    | -0.579966 | -0.361844 | 0.169433  |
| C    | 1.983825  | -0.344919 | -0.524802 |
| H    | 2.381906  | -1.377767 | -0.497323 |
| H    | 2.090753  | -0.020543 | -1.578040 |
| C    | 2.814083  | 0.548905  | 0.373386  |
| H    | 3.873225  | 0.531257  | 0.070414  |
| H    | 2.463523  | 1.592179  | 0.328396  |
| H    | 2.753870  | 0.221802  | 1.423503  |
| C    | -1.983707 | -0.343112 | 0.525967  |
| H    | -2.381810 | -1.376049 | 0.502193  |
| H    | -2.090297 | -0.015190 | 1.578137  |
| C    | -2.814227 | 0.547591  | -0.375059 |
| H    | -3.873244 | 0.531066  | -0.071624 |
| H    | -2.463616 | 1.591024  | -0.333960 |
| H    | -2.754426 | 0.216690  | -1.423995 |

**Cu<sub>2</sub>(OAc)<sub>2</sub>**

| Atom | X         | Y         | Z         |
|------|-----------|-----------|-----------|
| Cu   | -0.001236 | -1.209410 | -0.010850 |
| Cu   | 0.001312  | 1.211431  | -0.010047 |
| C    | -2.394998 | 0.004931  | -0.001848 |



|   |           |           |           |
|---|-----------|-----------|-----------|
| O | -1.823234 | -1.109316 | -0.006623 |
| O | -1.821800 | 1.117527  | -0.006881 |
| C | -3.884066 | -0.003130 | 0.038708  |
| H | -4.208316 | -0.241038 | 1.065018  |
| H | -4.301045 | 0.973139  | -0.238999 |
| H | -4.284388 | -0.792696 | -0.612571 |
| C | 2.395075  | -0.001957 | -0.005885 |
| O | 1.821323  | -1.114694 | -0.010308 |
| O | 1.823872  | 1.112186  | -0.012385 |
| C | 3.883833  | -0.004476 | 0.042040  |
| H | 4.297870  | 0.896486  | -0.429660 |
| H | 4.200422  | -0.002075 | 1.098238  |
| H | 4.292910  | -0.910253 | -0.424540 |

**Cu<sub>2</sub>(OAc)<sub>4</sub>**

| Atom | X         | Y         | Z         |
|------|-----------|-----------|-----------|
| Cu   | -0.009504 | -0.000835 | -1.196015 |
| Cu   | -0.001699 | -0.010459 | 1.201514  |
| C    | -1.736254 | -1.716344 | -0.001096 |
| O    | -1.078012 | -1.571693 | -1.051352 |
| O    | -1.581304 | -1.068954 | 1.054294  |
| C    | -2.830616 | -2.735414 | -0.015968 |
| H    | -2.940981 | -3.201799 | 0.971957  |
| H    | -3.775335 | -2.218158 | -0.249809 |
| H    | -2.656239 | -3.493666 | -0.789968 |
| C    | 1.715686  | -1.726241 | -0.007999 |
| O    | 1.565396  | -1.066724 | -1.056789 |
| O    | 1.057297  | -1.588411 | 1.042756  |
| C    | 2.805323  | -2.750509 | -0.002152 |
| H    | 2.614288  | -3.528729 | 0.747813  |
| H    | 2.932024  | -3.190416 | -1.000181 |
| H    | 3.747408  | -2.244266 | 0.264188  |
| C    | 1.725891  | 1.706064  | -0.000777 |
| O    | 1.060608  | 1.571882  | -1.047887 |
| O    | 1.579022  | 1.046456  | 1.048271  |
| C    | 2.819349  | 2.726148  | -0.011632 |
| H    | 2.933788  | 3.183220  | 0.980381  |
| H    | 3.763584  | 2.211573  | -0.253115 |
| H    | 2.642303  | 3.491729  | -0.777606 |
| C    | -1.715658 | 1.726445  | 0.015451  |
| O    | -1.060733 | 1.570195  | 1.065450  |
| O    | -1.579368 | 1.068451  | -1.036742 |
| C    | -2.735820 | 2.819784  | 0.000792  |

|   |           |          |           |
|---|-----------|----------|-----------|
| H | -2.270087 | 3.715127 | -0.442072 |
| H | -3.590548 | 2.545576 | -0.632003 |
| H | -3.065984 | 3.068121 | 1.017227  |

**AcOH**

| Atom | X         | Y         | Z         |
|------|-----------|-----------|-----------|
| C    | -1.354632 | 0.002448  | -0.000015 |
| H    | -1.697682 | 0.560940  | 0.886609  |
| H    | -1.697667 | 0.562467  | -0.885678 |
| H    | -1.819687 | -0.990289 | -0.000836 |
| O    | 0.813791  | 1.013724  | 0.000002  |
| H    | 0.210786  | 1.783707  | -0.000058 |
| O    | 0.726490  | -1.161272 | -0.000012 |
| C    | 0.134965  | -0.125189 | 0.000023  |

**1**

| Atom | X         | Y         | Z         |
|------|-----------|-----------|-----------|
| O    | 2.558198  | -3.243960 | -0.220774 |
| C    | -2.155360 | -2.200361 | 0.774344  |
| C    | -3.512403 | -2.468777 | 0.746456  |
| H    | -3.936467 | -3.200340 | 1.444494  |
| C    | -4.331788 | -1.808797 | -0.154433 |
| H    | -5.406892 | -2.022032 | -0.178635 |
| C    | -3.787196 | -0.880182 | -1.027739 |
| H    | -4.429077 | -0.362812 | -1.750064 |
| C    | -2.433103 | -0.604389 | -0.998391 |
| H    | -2.003338 | 0.125117  | -1.695744 |
| C    | -1.601176 | -1.260645 | -0.093261 |
| C    | -0.151679 | -1.003615 | -0.061630 |
| C    | 0.429775  | 0.230257  | 0.013360  |
| C    | -0.387431 | 1.456807  | 0.087278  |
| C    | -0.276604 | 2.432897  | -0.901838 |
| H    | 0.424960  | 2.276420  | -1.732090 |
| C    | -1.048269 | 3.579904  | -0.856261 |
| H    | -0.949638 | 4.334071  | -1.646407 |
| C    | -1.949277 | 3.771256  | 0.178907  |
| H    | -2.563871 | 4.678617  | 0.215367  |
| C    | -2.066357 | 2.810566  | 1.170086  |
| H    | -2.772020 | 2.956712  | 1.996600  |
| C    | -1.288527 | 1.666814  | 1.128004  |
| H    | -1.382921 | 0.906902  | 1.914837  |
| C    | 1.865911  | 0.302719  | 0.042588  |

|   |           |           |           |   |          |           |           |
|---|-----------|-----------|-----------|---|----------|-----------|-----------|
| C | 2.562449  | 1.514527  | 0.184599  | C | 2.764851 | 3.931381  | 0.582045  |
| H | 2.003964  | 2.450449  | 0.290706  | H | 2.259560 | 4.658745  | 1.227506  |
| C | 3.937144  | 1.540292  | 0.205025  | C | 3.875347 | 4.305774  | -0.154387 |
| C | 4.680432  | 0.365822  | 0.090776  | H | 4.254672 | 5.332695  | -0.095542 |
| H | 5.775368  | 0.401795  | 0.103924  | C | 4.499608 | 3.379251  | -0.975482 |
| C | 4.023425  | -0.835576 | -0.021827 | H | 5.368323 | 3.672747  | -1.576538 |
| H | 4.568088  | -1.784216 | -0.095048 | C | 4.026572 | 2.083214  | -1.048032 |
| C | 2.630571  | -0.879460 | -0.038091 | H | 4.514975 | 1.358186  | -1.709707 |
| C | 1.985424  | -2.177359 | -0.128398 | C | 2.916838 | 1.693271  | -0.301218 |
| H | 4.453946  | 2.501338  | 0.317496  | C | 2.409229 | 0.313919  | -0.383301 |
| H | -1.511431 | -2.711076 | 1.502404  | C | 3.192972 | -0.805313 | -0.286582 |
| N | 0.621474  | -2.125066 | -0.103457 | C | 4.630077 | -0.707390 | 0.036604  |
| H | 0.157655  | -3.039998 | -0.234766 | C | 5.599200 | -1.188885 | -0.840541 |

## 2-Rh

| Atom | X         | Y         | Z         | Atom | X         | Y         | Z         |
|------|-----------|-----------|-----------|------|-----------|-----------|-----------|
| Rh   | -2.382292 | -0.036317 | 0.067600  | H    | 5.286324  | -1.634161 | -1.794563 |
| O    | -0.809316 | -0.969028 | -1.015789 | C    | 6.943967  | -1.096052 | -0.526223 |
| C    | -4.899170 | -1.485415 | 1.521594  | H    | 7.694616  | -1.473668 | -1.230953 |
| H    | -5.715993 | -0.923904 | 1.051418  | C    | 7.341144  | -0.522997 | 0.671771  |
| H    | -5.238146 | -1.846562 | 2.509200  | H    | 8.406425  | -0.449901 | 0.920235  |
| H    | -4.700235 | -2.373274 | 0.900506  | C    | 6.385843  | -0.044521 | 1.553179  |
| C    | -3.687988 | -0.659344 | 1.688130  | H    | 6.691673  | 0.407147  | 2.504341  |
| C    | -3.608959 | 0.765245  | 1.630648  | C    | 5.041676  | -0.138786 | 1.238982  |
| C    | -2.243742 | 1.137609  | 1.918428  | H    | 4.283279  | 0.241554  | 1.935838  |
| C    | -1.496147 | -0.042726 | 2.090768  | C    | 2.568550  | -2.087504 | -0.423341 |
| C    | -2.378794 | -1.168070 | 1.902410  | C    | 3.264367  | -3.299031 | -0.263625 |
| C    | -2.003829 | -2.589946 | 2.051411  | H    | 4.331719  | -3.281957 | -0.019425 |
| H    | -0.981022 | -2.784123 | 1.688600  | C    | 2.617468  | -4.502984 | -0.397249 |
| H    | -2.684562 | -3.249328 | 1.490921  | C    | 1.252004  | -4.561928 | -0.687770 |
| H    | -2.038472 | -2.902967 | 3.111276  | H    | 0.753189  | -5.531947 | -0.793077 |
| C    | -4.718692 | 1.727706  | 1.483976  | C    | 0.540906  | -3.396180 | -0.825959 |
| H    | -4.452238 | 2.539979  | 0.788142  | H    | -0.534844 | -3.399312 | -1.040371 |
| H    | -4.951928 | 2.192542  | 2.459737  | C    | 1.184217  | -2.163238 | -0.690386 |
| H    | -5.626611 | 1.252414  | 1.091862  | C    | 0.408398  | -0.955607 | -0.774950 |
| C    | -1.778756 | 2.531182  | 2.065025  | H    | 3.183399  | -5.433354 | -0.266624 |
| H    | -2.071584 | 2.924672  | 3.055695  | C    | -5.077913 | -1.362257 | -2.938665 |
| H    | -2.229462 | 3.188348  | 1.304924  | H    | -4.660497 | -2.372238 | -3.061112 |
| H    | -0.687253 | 2.620664  | 1.970246  | H    | -6.176260 | -1.404071 | -2.922265 |
| C    | -0.075696 | -0.145601 | 2.482741  | H    | -4.778520 | -0.774957 | -3.822633 |
| H    | 0.492324  | 0.765449  | 2.243567  | O    | -3.372793 | -1.047577 | -1.390047 |
| H    | 0.435641  | -1.001236 | 2.010353  | O    | -5.223368 | 0.154528  | -1.119323 |
| H    | -0.004809 | -0.299307 | 3.575280  | C    | -4.552871 | -0.674967 | -1.703103 |
|      |           |           |           | C    | 2.284023  | 2.636954  | 0.503928  |
|      |           |           |           | H    | 1.397427  | 2.351429  | 1.084229  |
|      |           |           |           | C    | -1.896371 | 3.388794  | -2.509098 |
|      |           |           |           | H    | -1.385774 | 4.334237  | -2.278241 |

|             |           |           |           |    |           |           |           |
|-------------|-----------|-----------|-----------|----|-----------|-----------|-----------|
| H           | -1.521504 | 3.039936  | -3.485729 | H  | 4.734631  | 1.340688  | -1.710150 |
| H           | -2.978184 | 3.551976  | -2.612625 | C  | 3.126731  | 1.690857  | -0.316205 |
| C           | -1.583374 | 2.344791  | -1.471146 | C  | 2.607167  | 0.316364  | -0.405084 |
| O           | -2.469513 | 1.457096  | -1.343342 | C  | 3.379449  | -0.810437 | -0.301321 |
| O           | -0.518771 | 2.411406  | -0.857509 | C  | 4.813414  | -0.725014 | 0.039343  |
| H           | 0.479115  | 1.052579  | -0.665363 | C  | 5.789201  | -1.212588 | -0.826864 |
| N           | 1.066959  | 0.198822  | -0.586640 | H  | 5.484550  | -1.654874 | -1.784906 |
| <b>2-Ir</b> |           |           |           | C  | 7.130772  | -1.128465 | -0.496868 |
| Atom        | X         | Y         | Z         | H  | 7.887196  | -1.509979 | -1.193214 |
| O           | -0.612555 | -0.935869 | -1.094314 | C  | 7.517662  | -0.558859 | 0.706167  |
| C           | -4.675224 | -1.482320 | 1.533441  | H  | 8.580491  | -0.492471 | 0.966898  |
| H           | -5.469442 | -0.931539 | 1.013541  | C  | 6.555320  | -0.075644 | 1.577338  |
| H           | -5.053092 | -1.799186 | 2.521650  | H  | 6.853042  | 0.372986  | 2.532474  |
| H           | -4.465508 | -2.394463 | 0.953000  | C  | 5.214387  | -0.160492 | 1.247258  |
| C           | -3.461602 | -0.658229 | 1.705239  | H  | 4.450321  | 0.223730  | 1.935750  |
| C           | -3.391413 | 0.771142  | 1.657594  | C  | 2.744908  | -2.086341 | -0.445584 |
| C           | -2.021643 | 1.145767  | 1.933034  | C  | 3.425542  | -3.304494 | -0.272483 |
| C           | -1.267481 | -0.036849 | 2.095902  | H  | 4.489875  | -3.297711 | -0.014551 |
| C           | -2.149770 | -1.167308 | 1.922201  | C  | 2.766417  | -4.501596 | -0.407918 |
| C           | -1.772917 | -2.587942 | 2.087495  | C  | 1.403432  | -4.547294 | -0.713159 |
| H           | -0.748682 | -2.783486 | 1.729621  | H  | 0.895087  | -5.512461 | -0.816691 |
| H           | -2.448760 | -3.254644 | 1.529785  | C  | 0.707131  | -3.375032 | -0.867802 |
| H           | -1.811328 | -2.890852 | 3.149936  | H  | -0.366463 | -3.366963 | -1.092952 |
| C           | -4.522347 | 1.715025  | 1.546646  | C  | 1.363713  | -2.148574 | -0.732611 |
| H           | -4.243011 | 2.612987  | 0.973209  | C  | 0.603407  | -0.934902 | -0.829512 |
| H           | -4.843736 | 2.050095  | 2.549737  | H  | 3.320228  | -5.437510 | -0.265368 |
| H           | -5.380711 | 1.260021  | 1.034567  | C  | -4.863785 | -1.341527 | -2.984974 |
| C           | -1.552705 | 2.539436  | 2.076028  | H  | -4.590168 | -2.407370 | -2.991549 |
| H           | -1.846203 | 2.938511  | 3.063789  | H  | -5.953589 | -1.231645 | -3.073345 |
| H           | -1.994948 | 3.195165  | 1.309661  | H  | -4.396286 | -0.888066 | -3.874247 |
| H           | -0.460492 | 2.623092  | 1.983335  | O  | -3.161941 | -1.006256 | -1.442651 |
| C           | 0.158682  | -0.137861 | 2.472128  | O  | -5.027434 | 0.170939  | -1.159429 |
| H           | 0.723993  | 0.771551  | 2.220547  | C  | -4.349933 | -0.646766 | -1.750748 |
| H           | 0.662037  | -0.993868 | 1.991794  | C  | 2.496257  | 2.639951  | 0.484353  |
| H           | 0.245938  | -0.288390 | 3.563519  | H  | 1.601709  | 2.363210  | 1.056352  |
| C           | 2.989491  | 3.929356  | 0.568125  | C  | -1.679364 | 3.414844  | -2.513824 |
| H           | 2.485679  | 4.661007  | 1.209855  | H  | -1.989839 | 4.324018  | -1.972836 |
| C           | 4.110056  | 4.293316  | -0.158184 | H  | -0.786703 | 3.683115  | -3.098115 |
| H           | 4.499127  | 5.316337  | -0.094947 | H  | -2.495776 | 3.116056  | -3.184533 |
| C           | 4.732543  | 3.361248  | -0.974396 | C  | -1.344140 | 2.345770  | -1.511550 |
| H           | 5.609417  | 3.646557  | -1.567498 | O  | -2.202808 | 1.425165  | -1.414419 |
| C           | 4.247204  | 2.070088  | -1.052507 | O  | -0.304749 | 2.445370  | -0.861673 |
|             |           |           |           | Ir | -2.171894 | -0.030484 | 0.074734  |
|             |           |           |           | H  | 0.686056  | 1.072408  | -0.697724 |

|               |           |           |           |               |           |           |           |
|---------------|-----------|-----------|-----------|---------------|-----------|-----------|-----------|
| N             | 1.266249  | 0.212664  | -0.625027 | C             | 4.486383  | -0.490352 | 0.071839  |
|               |           |           |           | C             | 5.582662  | -0.801427 | -0.731628 |
| <b>TS3-Rh</b> |           |           |           | H             | 5.411640  | -1.198324 | -1.741347 |
|               |           |           |           | C             | 6.874242  | -0.595934 | -0.277572 |
| Atom          | X         | Y         | Z         | H             | 7.723736  | -0.840880 | -0.926358 |
| Rh            | -2.215471 | -0.131768 | 0.156153  | C             | 7.094568  | -0.074610 | 0.987654  |
| O             | -0.866204 | -1.141346 | -1.123788 | H             | 8.117668  | 0.089176  | 1.345692  |
| N             | 0.899824  | 0.175044  | -0.750550 | C             | 6.013531  | 0.237319  | 1.796952  |
| C             | -4.832475 | -1.712575 | 1.254168  | H             | 6.178071  | 0.647697  | 2.800509  |
| H             | -5.633532 | -0.984703 | 1.072116  | C             | 4.723737  | 0.025426  | 1.344055  |
| H             | -5.138701 | -2.379363 | 2.080057  | H             | 3.866042  | 0.275227  | 1.983095  |
| H             | -4.734196 | -2.337175 | 0.351693  | C             | 2.610224  | -2.001088 | -0.682834 |
| C             | -3.556170 | -1.053821 | 1.594149  | C             | 3.410184  | -3.157808 | -0.615661 |
| C             | -3.360183 | 0.317048  | 1.933260  | H             | 4.463270  | -3.070782 | -0.328510 |
| C             | -1.962842 | 0.486681  | 2.243887  | C             | 2.888426  | -4.394118 | -0.901160 |
| C             | -1.301574 | -0.739006 | 2.046696  | C             | 1.545461  | -4.545167 | -1.258951 |
| C             | -2.285855 | -1.699885 | 1.601717  | H             | 1.145895  | -5.538718 | -1.492658 |
| C             | -2.027815 | -3.127868 | 1.333915  | C             | 0.731743  | -3.441357 | -1.297357 |
| H             | -1.048591 | -3.276466 | 0.852923  | H             | -0.330799 | -3.526136 | -1.555526 |
| H             | -2.794398 | -3.565940 | 0.676436  | C             | 1.244442  | -2.173703 | -1.005689 |
| H             | -2.024944 | -3.708288 | 2.274559  | C             | 0.375905  | -1.027590 | -0.962748 |
| C             | -4.376643 | 1.369440  | 2.124240  | H             | 3.537021  | -5.277194 | -0.844039 |
| H             | -4.112261 | 2.284653  | 1.569897  | C             | -5.129830 | -0.128174 | -2.944922 |
| H             | -4.449278 | 1.637670  | 3.194352  | H             | -4.938055 | -1.141031 | -3.328620 |
| H             | -5.366646 | 1.054764  | 1.772708  | H             | -6.211452 | 0.060010  | -2.897798 |
| C             | -1.380195 | 1.758622  | 2.713526  | H             | -4.690568 | 0.575500  | -3.670855 |
| H             | -1.770101 | 1.998318  | 3.719189  | O             | -3.338347 | -0.459909 | -1.504402 |
| H             | -1.658927 | 2.598888  | 2.055793  | O             | -5.046534 | 0.733760  | -0.731115 |
| H             | -0.283155 | 1.718331  | 2.782380  | C             | -4.489190 | 0.086231  | -1.596064 |
| C             | 0.125393  | -1.022777 | 2.311948  | C             | 1.686417  | 2.597568  | 0.425457  |
| H             | 0.769931  | -0.152373 | 2.106353  | H             | 0.751438  | 2.169409  | 0.809040  |
| H             | 0.502300  | -1.867309 | 1.713084  | C             | -2.034552 | 3.494921  | -2.261561 |
| H             | 0.264955  | -1.295449 | 3.373979  | H             | -1.256835 | 4.115642  | -2.725788 |
| C             | 1.971385  | 3.935264  | 0.630201  | H             | -2.690919 | 3.114833  | -3.062112 |
| H             | 1.267167  | 4.562497  | 1.190200  | H             | -2.660295 | 4.091977  | -1.585430 |
| C             | 3.140869  | 4.479854  | 0.124594  | C             | -1.449133 | 2.324166  | -1.547582 |
| H             | 3.367657  | 5.541130  | 0.279857  | O             | -2.101009 | 1.826527  | -0.620734 |
| C             | 4.016644  | 3.677120  | -0.589179 | O             | -0.329069 | 1.926209  | -1.960725 |
| H             | 4.933504  | 4.104834  | -1.011384 | H             | 0.170238  | 1.119822  | -1.305516 |
| C             | 3.737965  | 2.336915  | -0.783895 |               |           |           |           |
| H             | 4.428998  | 1.717821  | -1.367441 | <b>TS3-Ir</b> |           |           |           |
| C             | 2.570164  | 1.774251  | -0.271119 |               |           |           |           |
| C             | 2.212074  | 0.359610  | -0.483574 | Atom          | X         | Y         | Z         |
| C             | 3.100848  | -0.689137 | -0.394671 | O             | 0.647856  | 1.086425  | -0.949671 |

|   |           |           |           |             |           |           |           |
|---|-----------|-----------|-----------|-------------|-----------|-----------|-----------|
| N | -1.163661 | -0.168669 | -0.477299 | C           | -6.602448 | -0.043916 | 1.435712  |
| C | 4.840294  | 1.235503  | 1.450764  | H           | -6.948082 | -0.524060 | 2.359223  |
| H | 5.600040  | 0.621797  | 0.950149  | C           | -5.245947 | 0.093645  | 1.200102  |
| H | 5.239605  | 1.570360  | 2.424281  | H           | -4.519356 | -0.280717 | 1.933142  |
| H | 4.681608  | 2.134320  | 0.833775  | C           | -2.742945 | 2.128800  | -0.350455 |
| C | 3.579347  | 0.494207  | 1.657411  | C           | -3.460089 | 3.332090  | -0.208741 |
| C | 3.392388  | -0.915716 | 1.568508  | H           | -4.532295 | 3.300159  | 0.012322  |
| C | 2.005934  | -1.188794 | 1.876184  | C           | -2.827725 | 4.543027  | -0.333319 |
| C | 1.354310  | 0.039049  | 2.127386  | C           | -1.456709 | 4.617315  | -0.599162 |
| C | 2.314864  | 1.102076  | 1.942286  | H           | -0.967991 | 5.593520  | -0.696259 |
| C | 2.051664  | 2.540282  | 2.164569  | C           | -0.729563 | 3.460918  | -0.726871 |
| H | 1.067001  | 2.837082  | 1.765503  | H           | 0.348584  | 3.481931  | -0.925551 |
| H | 2.808467  | 3.171143  | 1.674318  | C           | -1.356942 | 2.216354  | -0.600155 |
| H | 2.059044  | 2.785586  | 3.242001  | C           | -0.582794 | 1.007893  | -0.676236 |
| C | 4.422150  | -1.951305 | 1.345282  | H           | -3.407286 | 5.467173  | -0.216477 |
| H | 4.071896  | -2.713732 | 0.631093  | C           | 4.815539  | 1.338146  | -3.030808 |
| H | 4.666026  | -2.467693 | 2.291267  | H           | 4.642371  | 2.421176  | -2.944879 |
| H | 5.344620  | -1.525723 | 0.929550  | H           | 5.885847  | 1.138247  | -3.175937 |
| C | 1.427702  | -2.544810 | 1.979110  | H           | 4.273290  | 1.001384  | -3.929324 |
| H | 1.649462  | -2.979425 | 2.970493  | O           | 3.141397  | 1.026339  | -1.453204 |
| H | 1.852799  | -3.229361 | 1.227068  | O           | 4.918064  | -0.306232 | -1.317915 |
| H | 0.335539  | -2.544882 | 1.849812  | C           | 4.288543  | 0.600072  | -1.828155 |
| C | -0.040194 | 0.236404  | 2.573979  | C           | -2.554383 | -2.553621 | 0.699183  |
| H | -0.695749 | -0.597471 | 2.284151  | H           | -1.762105 | -2.246864 | 1.394509  |
| H | -0.481458 | 1.162211  | 2.169123  | C           | 1.533745  | -3.469891 | -2.413118 |
| H | -0.069150 | 0.319385  | 3.675491  | H           | 1.645560  | -4.325577 | -1.726620 |
| C | -3.077501 | -3.832412 | 0.771743  | H           | 0.722572  | -3.726212 | -3.109913 |
| H | -2.693515 | -4.536283 | 1.520060  | H           | 2.477450  | -3.324664 | -2.952937 |
| C | -4.085598 | -4.220504 | -0.094722 | C           | 1.180317  | -2.264071 | -1.614765 |
| H | -4.501200 | -5.233613 | -0.037877 | O           | 2.027130  | -1.376165 | -1.479923 |
| C | -4.563163 | -3.322947 | -1.035884 | O           | 0.018620  | -2.273020 | -1.111763 |
| H | -5.353301 | -3.625051 | -1.733691 | H           | -0.389066 | -1.303166 | -0.757847 |
| C | -4.045576 | -2.042679 | -1.100755 | Ir          | 2.156124  | 0.060150  | 0.072593  |
| H | -4.424563 | -1.333814 | -1.847708 |             |           |           |           |
| C | -3.038400 | -1.638722 | -0.228959 | <b>4-Rh</b> |           |           |           |
| C | -2.503224 | -0.260729 | -0.297644 |             |           |           |           |
| C | -3.333057 | 0.835922  | -0.220784 | Atom        | X         | Y         | Z         |
| C | -4.780435 | 0.697668  | 0.034767  | Rh          | -1.920300 | 0.100613  | 0.156890  |
| C | -5.715557 | 1.170374  | -0.884841 | O           | -0.889242 | 2.663255  | -0.663985 |
| H | -5.362914 | 1.642667  | -1.811765 | N           | 0.072362  | 0.709761  | -0.101183 |
| C | -7.072684 | 1.037333  | -0.648725 | C           | -4.912449 | 1.235688  | -0.000146 |
| H | -7.792306 | 1.410009  | -1.387810 | H           | -5.361087 | 0.918014  | 0.952048  |
| C | -7.521113 | 0.427892  | 0.512070  | H           | -5.731457 | 1.418277  | -0.718013 |
| H | -8.596402 | 0.321363  | 0.698742  | H           | -4.404780 | 2.200007  | 0.168566  |



|   |           |           |           |               |           |           |           |
|---|-----------|-----------|-----------|---------------|-----------|-----------|-----------|
| H | -2.013787 | -3.393786 | 0.314135  | O             | -1.722513 | 1.654360  | 1.635115  |
| H | -1.110028 | -3.221933 | -1.201112 | C             | -1.237571 | 0.891169  | 2.498122  |
| C | -1.208445 | -0.904105 | -2.927981 | C             | 1.655254  | -2.185666 | -1.160035 |
| H | -0.602764 | -1.810724 | -2.790143 | H             | 1.976080  | -1.590064 | -2.025655 |
| H | -0.521763 | -0.044990 | -3.005128 | Ir            | -1.753320 | 0.096585  | 0.148350  |
| H | -1.734856 | -0.991237 | -3.894841 |               |           |           |           |
| C | 1.695043  | -3.568172 | -1.216954 | <b>TS5-Rh</b> |           |           |           |
| H | 2.030302  | -4.066441 | -2.134577 |               |           |           |           |
| C | 1.334764  | -4.315811 | -0.107190 | Atom          | X         | Y         | Z         |
| H | 1.381453  | -5.410887 | -0.139704 | Rh            | -1.719565 | -0.031751 | 0.089136  |
| C | 0.929920  | -3.667962 | 1.048255  | O             | -0.644881 | 2.834577  | -0.033091 |
| H | 0.657379  | -4.251393 | 1.936702  | N             | 0.180342  | 0.742744  | -0.070412 |
| C | 0.885746  | -2.283638 | 1.103219  | C             | -3.737649 | 2.514503  | -0.442377 |
| H | 0.587786  | -1.781943 | 2.027828  | H             | -3.650387 | 2.657083  | 0.647867  |
| C | 1.248140  | -1.523656 | -0.002917 | H             | -4.792547 | 2.702577  | -0.713753 |
| C | 1.379246  | -0.039423 | 0.012123  | H             | -3.112740 | 3.280660  | -0.918851 |
| C | 2.650453  | 0.491300  | 0.009261  | C             | -3.337227 | 1.149243  | -0.835840 |
| C | 3.851575  | -0.365367 | 0.071084  | C             | -3.896397 | -0.052182 | -0.264031 |
| C | 4.137020  | -1.168758 | 1.172386  | C             | -3.343046 | -1.163167 | -0.929203 |
| H | 3.449727  | -1.165319 | 2.028042  | C             | -2.359780 | -0.674951 | -1.858404 |
| C | 5.271697  | -1.961472 | 1.200143  | C             | -2.424876 | 0.757956  | -1.842911 |
| H | 5.475910  | -2.586512 | 2.078107  | C             | -1.642200 | 1.638414  | -2.733424 |
| C | 6.152654  | -1.958923 | 0.130931  | H             | -2.043046 | 1.578460  | -3.761297 |
| H | 7.052971  | -2.584577 | 0.155512  | H             | -0.583978 | 1.332851  | -2.782535 |
| C | 5.887147  | -1.158780 | -0.969172 | H             | -1.669964 | 2.686048  | -2.407484 |
| H | 6.575906  | -1.150543 | -1.822753 | C             | -4.929354 | -0.066598 | 0.791867  |
| C | 4.749932  | -0.372329 | -0.996571 | H             | -5.910894 | 0.232207  | 0.381168  |
| H | 4.538637  | 0.256055  | -1.872419 | H             | -4.689599 | 0.644850  | 1.599093  |
| C | 2.796808  | 1.905778  | -0.123619 | H             | -5.047913 | -1.063415 | 1.242986  |
| C | 4.030590  | 2.574912  | -0.031144 | C             | -3.780950 | -2.567037 | -0.788719 |
| H | 4.942344  | 2.003264  | 0.176618  | H             | -4.670649 | -2.735976 | -1.422832 |
| C | 4.101913  | 3.937948  | -0.188079 | H             | -4.068481 | -2.821089 | 0.243267  |
| C | 2.953590  | 4.691312  | -0.441076 | H             | -3.010105 | -3.281193 | -1.111870 |
| H | 3.024473  | 5.778057  | -0.565342 | C             | -1.572131 | -1.493771 | -2.804717 |
| C | 1.736281  | 4.058607  | -0.521823 | H             | -1.315080 | -2.477318 | -2.378627 |
| H | 0.812046  | 4.618094  | -0.706509 | H             | -0.626239 | -0.997419 | -3.073251 |
| C | 1.643468  | 2.675849  | -0.356882 | H             | -2.130100 | -1.672406 | -3.742298 |
| C | 0.334217  | 2.045661  | -0.415254 | C             | 0.919443  | -3.856754 | -0.602303 |
| H | 5.074483  | 4.439673  | -0.108136 | H             | 1.444128  | -4.689143 | -1.087538 |
| C | -0.831395 | 1.393722  | 3.831961  | C             | -0.255565 | -4.093568 | 0.100777  |
| H | 0.233553  | 1.676407  | 3.794543  | H             | -0.644677 | -5.116859 | 0.196660  |
| H | -1.407470 | 2.287411  | 4.107900  | C             | -0.932341 | -3.026787 | 0.665058  |
| H | -0.943732 | 0.613832  | 4.597787  | H             | -1.865505 | -3.212619 | 1.217083  |
| O | -1.073973 | -0.308589 | 2.175277  | C             | -0.455965 | -1.719277 | 0.554717  |



|   |           |           |           |   |           |           |           |
|---|-----------|-----------|-----------|---|-----------|-----------|-----------|
| H | -0.524084 | -1.038588 | 1.728966  | H | -2.905027 | 3.298235  | -0.920864 |
| C | 0.784467  | -1.510771 | -0.088886 | C | -3.225055 | 1.179387  | -0.825640 |
| C | 1.232643  | -0.114154 | -0.126285 | C | -3.780128 | 0.004019  | -0.198663 |
| C | 2.545622  | 0.306306  | -0.179368 | C | -3.262177 | -1.137633 | -0.847178 |
| C | 3.665592  | -0.643925 | -0.056298 | C | -2.310749 | -0.695170 | -1.837505 |
| C | 3.785910  | -1.417330 | 1.097715  | C | -2.343984 | 0.740099  | -1.848221 |
| H | 3.046087  | -1.287748 | 1.899007  | C | -1.570194 | 1.597740  | -2.769572 |
| C | 4.800662  | -2.346624 | 1.229753  | H | -2.096178 | 1.679902  | -3.737203 |
| H | 4.871370  | -2.950594 | 2.142538  | H | -0.573001 | 1.176700  | -2.974816 |
| C | 5.729694  | -2.510446 | 0.214346  | H | -1.428225 | 2.607370  | -2.361475 |
| H | 6.536154  | -3.246408 | 0.316081  | C | -4.783018 | 0.022259  | 0.887193  |
| C | 5.635803  | -1.734620 | -0.930321 | H | -5.795493 | 0.198271  | 0.481103  |
| H | 6.367595  | -1.857230 | -1.738222 | H | -4.580697 | 0.826009  | 1.613077  |
| C | 4.613857  | -0.809850 | -1.064481 | H | -4.807561 | -0.929322 | 1.439366  |
| H | 4.530549  | -0.211438 | -1.981600 | C | -3.716660 | -2.528795 | -0.640662 |
| C | 2.789518  | 1.713307  | -0.241636 | H | -4.644219 | -2.699865 | -1.216818 |
| C | 4.079093  | 2.277437  | -0.278295 | H | -3.946513 | -2.745539 | 0.414307  |
| H | 4.957133  | 1.623188  | -0.237491 | H | -2.977920 | -3.266906 | -0.985008 |
| C | 4.250477  | 3.638139  | -0.357383 | C | -1.586854 | -1.558106 | -2.797291 |
| C | 3.151860  | 4.498579  | -0.386941 | H | -1.309851 | -2.525468 | -2.347239 |
| H | 3.301915  | 5.582305  | -0.453016 | H | -0.654186 | -1.081804 | -3.138805 |
| C | 1.884292  | 3.972969  | -0.311286 | H | -2.199739 | -1.769664 | -3.692274 |
| H | 0.997632  | 4.617454  | -0.300717 | C | 1.096441  | -3.843794 | -0.673303 |
| C | 1.688118  | 2.594380  | -0.236343 | H | 1.621096  | -4.670131 | -1.168720 |
| C | 0.326104  | 2.089374  | -0.103420 | C | -0.068939 | -4.091153 | 0.042587  |
| H | 5.266253  | 4.051259  | -0.389908 | H | -0.449118 | -5.117485 | 0.139557  |
| C | -1.242900 | 1.112686  | 4.255719  | C | -0.747012 | -3.032533 | 0.617454  |
| H | -0.288424 | 1.629074  | 4.444625  | H | -1.669653 | -3.227559 | 1.183132  |
| H | -2.055448 | 1.849398  | 4.266215  | C | -0.284224 | -1.717115 | 0.504127  |
| H | -1.377002 | 0.381953  | 5.066835  | H | -0.331409 | -1.084365 | 1.682880  |
| O | -0.384644 | -0.571579 | 2.864610  | C | 0.956146  | -1.502745 | -0.140087 |
| O | -1.850391 | 0.824217  | 1.995921  | C | 1.405407  | -0.106500 | -0.164644 |
| C | -1.162672 | 0.412947  | 2.942807  | C | 2.720987  | 0.304528  | -0.213169 |
| C | 1.446583  | -2.580370 | -0.687003 | C | 3.834219  | -0.653912 | -0.088536 |
| H | 2.375268  | -2.422402 | -1.246166 | C | 3.942386  | -1.433509 | 1.062371  |

### TS5-Ir

| Atom | X         | Y        | Z         |
|------|-----------|----------|-----------|
| O    | -0.443912 | 2.860429 | -0.052421 |
| N    | 0.356955  | 0.758062 | -0.095584 |
| C    | -3.602806 | 2.567858 | -0.490382 |
| H    | -3.611735 | 2.731267 | 0.599491  |
| H    | -4.617929 | 2.794779 | -0.864120 |

|    |           |           |           |   |           |           |           |
|----|-----------|-----------|-----------|---|-----------|-----------|-----------|
| C  | 2.978265  | 1.709568  | -0.263428 | H | -4.768058 | -1.865714 | -0.812826 |
| C  | 4.272625  | 2.262944  | -0.292031 | C | -2.451558 | -2.382093 | -2.368892 |
| H  | 5.145061  | 1.601345  | -0.252649 | H | -2.825208 | -2.499632 | -3.402299 |
| C  | 4.455373  | 3.622688  | -0.360896 | H | -3.104230 | -2.981729 | -1.715562 |
| C  | 3.363834  | 4.492233  | -0.388840 | H | -1.447220 | -2.831951 | -2.330408 |
| H  | 3.522968  | 5.575078  | -0.446425 | C | -0.101662 | -0.324789 | -2.933640 |
| C  | 2.091859  | 3.976530  | -0.321535 | H | 0.222752  | -1.363875 | -2.760749 |
| H  | 1.210483  | 4.628084  | -0.309309 | H | 0.712542  | 0.333920  | -2.587744 |
| C  | 1.884298  | 2.598987  | -0.254749 | H | -0.197914 | -0.183759 | -4.026157 |
| C  | 0.518960  | 2.105185  | -0.125850 | C | -0.642485 | -1.761004 | 0.409430  |
| H  | 5.474545  | 4.027744  | -0.386702 | C | -1.201051 | -3.008722 | 0.642642  |
| C  | -0.889704 | 1.069934  | 4.272181  | H | -2.289500 | -3.142275 | 0.556733  |
| H  | -1.667221 | 1.843017  | 4.305956  | C | -0.404437 | -4.089561 | 0.993022  |
| H  | -1.038511 | 0.340138  | 5.081515  | H | -0.859302 | -5.071361 | 1.180303  |
| H  | 0.091093  | 1.541605  | 4.443296  | C | 0.965803  | -3.920985 | 1.120430  |
| O  | -0.150872 | -0.646821 | 2.849607  | H | 1.599151  | -4.766360 | 1.414073  |
| O  | -1.551779 | 0.839705  | 2.023830  | C | 1.541622  | -2.681790 | 0.902930  |
| C  | -0.868537 | 0.376387  | 2.954121  | H | 2.621060  | -2.567717 | 1.050360  |
| C  | 1.616389  | -2.564161 | -0.753138 | C | 0.750686  | -1.589588 | 0.540451  |
| H  | 2.539229  | -2.397574 | -1.319181 | C | 1.198549  | -0.194467 | 0.419098  |
| Ir | -1.571308 | -0.016301 | 0.078030  | C | 2.469052  | 0.275717  | 0.186450  |

### 6-Rh

| Atom | X         | Y         | Z         |   |           |           |           |
|------|-----------|-----------|-----------|---|-----------|-----------|-----------|
| Rh   | -1.656302 | -0.114388 | -0.118491 | C | 3.596745  | -0.623596 | -0.118332 |
| O    | -0.713719 | 2.692783  | 0.982058  | C | 4.696024  | -0.710248 | 0.735037  |
| N    | 0.134191  | 0.644724  | 0.622918  | H | 4.719068  | -0.089628 | 1.640935  |
| C    | -3.975347 | 2.244079  | -0.786276 | C | 5.738347  | -1.580248 | 0.464451  |
| H    | -4.432805 | 1.942319  | 0.171103  | H | 6.589437  | -1.641295 | 1.153441  |
| H    | -4.805673 | 2.491400  | -1.472796 | C | 5.702661  | -2.378783 | -0.667097 |
| H    | -3.407613 | 3.168295  | -0.600147 | H | 6.525092  | -3.072027 | -0.879222 |
| C    | -3.116894 | 1.172897  | -1.335419 | C | 4.623682  | -2.291243 | -1.532606 |
| C    | -3.470685 | -0.236846 | -1.346985 | H | 4.591056  | -2.913884 | -2.435061 |
| C    | -2.440127 | -0.952509 | -1.992785 | C | 3.586104  | -1.416138 | -1.263159 |
| C    | -1.370973 | -0.029195 | -2.233554 | H | 2.726153  | -1.352573 | -1.943980 |
| C    | -1.853996 | 1.298288  | -1.904371 | C | 2.673637  | 1.694554  | 0.206168  |
| C    | -1.094312 | 2.540903  | -2.151543 | C | 3.908464  | 2.297210  | -0.095982 |
| H    | -1.230127 | 2.862430  | -3.200319 | H | 4.763532  | 1.670335  | -0.373089 |
| H    | -0.010611 | 2.400371  | -2.002467 | C | 4.054308  | 3.663802  | -0.058224 |
| H    | -1.413943 | 3.365483  | -1.498866 | C | 2.981816  | 4.491979  | 0.273671  |
| C    | -4.763490 | -0.766560 | -0.864186 | H | 3.112521  | 5.579633  | 0.301577  |
| H    | -5.588789 | -0.460182 | -1.532426 | C | 1.759303  | 3.927565  | 0.552219  |
| H    | -5.005511 | -0.383028 | 0.140630  | H | 0.886452  | 4.543914  | 0.798375  |
|      |           |           |           | C | 1.592824  | 2.543869  | 0.521109  |
|      |           |           |           | C | 0.262049  | 1.990908  | 0.734110  |
|      |           |           |           | H | 5.028537  | 4.107019  | -0.299470 |
|      |           |           |           | O | -2.738103 | -0.117552 | 1.734555  |

|             |           |           |           |               |           |           |           |
|-------------|-----------|-----------|-----------|---------------|-----------|-----------|-----------|
| C           | -2.324681 | 0.004328  | 2.874882  | H             | 1.798939  | -4.769103 | 1.392283  |
| C           | -3.223761 | -0.007552 | 4.051054  | C             | 1.720063  | -2.681650 | 0.893515  |
| H           | -4.239840 | -0.297394 | 3.760965  | H             | 2.799581  | -2.559551 | 1.032366  |
| H           | -2.835203 | -0.691508 | 4.820040  | C             | 0.917638  | -1.594841 | 0.542889  |
| H           | -3.244555 | 0.999038  | 4.498357  | C             | 1.364414  | -0.198781 | 0.424012  |
| O           | -1.078681 | 0.166337  | 3.179243  | C             | 2.631438  | 0.272929  | 0.177289  |
| H           | -0.550281 | 0.212497  | 2.346902  | C             | 3.755461  | -0.621577 | -0.154883 |
| <b>6-Ir</b> |           |           |           | C             | 4.871522  | -0.705718 | 0.676459  |
| Atom        | X         | Y         | Z         | H             | 4.906345  | -0.092551 | 1.587010  |
| O           | -0.533150 | 2.693331  | 1.029943  | C             | 5.917972  | -1.560965 | 0.377069  |
| N           | 0.303555  | 0.644628  | 0.644177  | H             | 6.783403  | -1.618676 | 1.048328  |
| C           | -3.842587 | 2.311530  | -0.731681 | C             | 5.868454  | -2.348945 | -0.761243 |
| H           | -4.306888 | 2.003184  | 0.219886  | H             | 6.694146  | -3.030635 | -0.996770 |
| H           | -4.666032 | 2.595073  | -1.412303 | C             | 4.770724  | -2.266271 | -1.603471 |
| H           | -3.250965 | 3.216906  | -0.527327 | H             | 4.726552  | -2.881521 | -2.510473 |
| C           | -3.010896 | 1.230631  | -1.303129 | C             | 3.729290  | -1.404745 | -1.305852 |
| C           | -3.375144 | -0.177641 | -1.300009 | H             | 2.854949  | -1.343240 | -1.968881 |
| C           | -2.358264 | -0.902845 | -1.966011 | C             | 2.840103  | 1.691265  | 0.205807  |
| C           | -1.282245 | 0.016553  | -2.233174 | C             | 4.071592  | 2.294513  | -0.109807 |
| C           | -1.755458 | 1.346608  | -1.894967 | H             | 4.920802  | 1.669257  | -0.407235 |
| C           | -0.981212 | 2.582608  | -2.132621 | C             | 4.221524  | 3.660256  | -0.060453 |
| H           | -1.118565 | 2.919023  | -3.176164 | C             | 3.156889  | 4.488225  | 0.296722  |
| H           | 0.101076  | 2.423421  | -1.991090 | H             | 3.291018  | 5.575198  | 0.333333  |
| H           | -1.284832 | 3.403230  | -1.467408 | C             | 1.937522  | 3.923996  | 0.587993  |
| C           | -4.670963 | -0.697607 | -0.810692 | H             | 1.069746  | 4.539612  | 0.853032  |
| H           | -5.493117 | -0.422186 | -1.495803 | C             | 1.767140  | 2.540880  | 0.544872  |
| H           | -4.922742 | -0.283402 | 0.179454  | C             | 0.438450  | 1.991253  | 0.767426  |
| H           | -4.666086 | -1.794328 | -0.719924 | H             | 5.192978  | 4.103201  | -0.313043 |
| C           | -2.387608 | -2.331490 | -2.346604 | O             | -2.503866 | -0.121204 | 1.833961  |
| H           | -2.776615 | -2.442881 | -3.374697 | C             | -2.054924 | -0.014404 | 2.963548  |
| H           | -3.033524 | -2.926962 | -1.682808 | C             | -2.921138 | -0.043521 | 4.162701  |
| H           | -1.385550 | -2.787479 | -2.321732 | H             | -3.947137 | -0.320214 | 3.895396  |
| C           | -0.041679 | -0.283552 | -2.985074 | H             | -2.516275 | -0.746663 | 4.905748  |
| H           | 0.277165  | -1.328488 | -2.837116 | H             | -2.920588 | 0.953356  | 4.631702  |
| H           | 0.792969  | 0.358767  | -2.656322 | O             | -0.801935 | 0.146376  | 3.234511  |
| H           | -0.172729 | -0.125724 | -4.071358 | H             | -0.293350 | 0.204450  | 2.391847  |
| C           | -0.479731 | -1.765628 | 0.419054  | Ir            | -1.513780 | -0.112551 | -0.105404 |
| C           | -1.019237 | -3.025985 | 0.651784  | <b>7-Rh-a</b> |           |           |           |
| H           | -2.106678 | -3.169984 | 0.572512  | Atom          | X         | Y         | Z         |
| C           | -0.212956 | -4.102622 | 0.989042  | C             | 3.410504  | -1.527594 | -0.314955 |
| H           | -0.659697 | -5.088718 | 1.172855  | C             | 3.578435  | -0.374617 | -1.141863 |
| C           | 1.157093  | -3.926862 | 1.108525  | C             | 2.776276  | -0.571017 | -2.300788 |













|   |           |           |           |                 |           |           |           |
|---|-----------|-----------|-----------|-----------------|-----------|-----------|-----------|
| C | -1.682216 | -0.994743 | -3.326965 | H               | 1.386099  | 4.547857  | -0.196696 |
| H | -2.332583 | -0.984770 | -4.220899 | H               | 3.426324  | -1.264856 | 1.972513  |
| H | -0.720322 | -0.543595 | -3.617820 | H               | 5.310499  | -2.844631 | 2.309249  |
| H | -1.483724 | -2.048698 | -3.073074 | H               | 6.989810  | -3.178497 | 0.503767  |
| C | -1.462931 | 2.071702  | -2.836660 | H               | 6.783365  | -1.904330 | -1.620105 |
| H | -0.427552 | 1.719761  | -2.978002 | H               | 4.891620  | -0.332701 | -1.950025 |
| H | -1.920808 | 2.131855  | -3.840801 | H               | 2.966156  | -2.596826 | -0.894367 |
| H | -1.408937 | 3.081945  | -2.412633 | H               | 1.988900  | -4.829673 | -0.962643 |
| C | -3.343477 | 2.819404  | -0.328673 | H               | -0.436964 | -5.153168 | -0.459630 |
| H | -4.353136 | 3.167059  | -0.614292 | H               | -1.860166 | -3.202102 | -0.013351 |
| H | -3.306559 | 2.812695  | 0.774004  | C               | -2.157258 | -1.855196 | 2.532546  |
| H | -2.612825 | 3.563464  | -0.672076 | H               | -2.996892 | -2.243065 | 1.919534  |
| C | -4.628510 | 0.182639  | 0.695247  | H               | -1.374154 | -2.635977 | 2.471756  |
| H | -4.320389 | 0.795339  | 1.559597  | C               | -0.759816 | 1.782808  | 2.615667  |
| H | -5.614724 | 0.558229  | 0.368402  | H               | 0.301800  | 1.959941  | 2.352479  |
| H | -4.772519 | -0.849699 | 1.049749  | H               | -1.300416 | 2.657919  | 2.208354  |
| C | -1.649898 | -0.615996 | 1.943239  | C               | -0.917850 | 1.700038  | 4.118163  |
| C | -1.226675 | 0.560628  | 1.962885  | H               | -0.571111 | 2.631081  | 4.595043  |
| C | 3.536325  | 4.410692  | -0.074491 | H               | -1.971400 | 1.544274  | 4.404776  |
| C | 4.623579  | 3.536608  | -0.006090 | H               | -0.331625 | 0.866184  | 4.538037  |
| C | 4.439468  | 2.176348  | -0.037773 | C               | -2.601109 | -1.660610 | 3.964848  |
| C | 3.147981  | 1.624916  | -0.149549 | H               | -1.768364 | -1.312538 | 4.597421  |
| C | 2.058264  | 2.515994  | -0.199733 | H               | -3.408711 | -0.912653 | 4.034933  |
| C | 2.266035  | 3.895287  | -0.162536 | H               | -2.975324 | -2.606466 | 4.388717  |
| C | 2.894073  | 0.221562  | -0.185096 | Ir              | -1.408421 | -0.068925 | -0.153620 |
| C | 1.582911  | -0.206060 | -0.273219 |                 |           |           |           |
| N | 0.532274  | 0.665606  | -0.256935 | <b>TS8-Rh-a</b> |           |           |           |
| C | 0.694352  | 2.013608  | -0.222461 | Atom            | X         | Y         | Z         |
| O | -0.274696 | 2.764914  | -0.188426 | C               | 3.540884  | -1.430012 | 0.146077  |
| C | 4.031018  | -0.704105 | -0.012371 | C               | 3.791329  | -0.194525 | -0.531159 |
| C | 4.174439  | -1.407820 | 1.181833  | C               | 3.371970  | -0.341934 | -1.889846 |
| C | 5.221772  | -2.292588 | 1.365738  | C               | 2.903774  | -2.306388 | -0.748209 |
| C | 6.158634  | -2.477864 | 0.361428  | C               | 2.761597  | -1.607764 | -2.004669 |
| C | 6.042767  | -1.766631 | -0.822631 | C               | 4.583145  | 0.912824  | 0.051261  |
| C | 4.989791  | -0.885307 | -1.006269 | H               | 5.637856  | 0.605304  | 0.176643  |
| C | 1.113047  | -1.586237 | -0.383868 | H               | 4.583712  | 1.812648  | -0.581443 |
| C | -0.276882 | -1.750408 | -0.218359 | H               | 4.218859  | 1.206825  | 1.049457  |
| C | 1.901298  | -2.705049 | -0.678086 | C               | 3.530398  | 0.636788  | -2.990006 |
| C | 1.350577  | -3.970640 | -0.725658 | H               | 4.269106  | 0.277964  | -3.729066 |
| C | 0.002625  | -4.147404 | -0.460945 | H               | 2.585512  | 0.811656  | -3.531734 |
| C | -0.795415 | -3.042621 | -0.215624 | H               | 3.880216  | 1.615264  | -2.629226 |
| H | 3.697233  | 5.494325  | -0.048235 | C               | 2.185936  | -2.176633 | -3.241962 |
| H | 5.640436  | 3.939783  | 0.079878  | H               | 1.818338  | -1.387510 | -3.916161 |
| H | 5.306616  | 1.510521  | 0.032877  |                 |           |           |           |

















|   |           |           |           |      |           |           |           |
|---|-----------|-----------|-----------|------|-----------|-----------|-----------|
| C | 0.803034  | 1.095511  | 0.892812  | H    | -0.604452 | 3.391744  | 0.463320  |
| C | 0.750298  | -0.123452 | 1.288643  | C    | 1.490344  | 4.859095  | 2.704483  |
| C | -3.890376 | -4.292830 | 0.065176  | H    | 3.136304  | 3.884177  | 3.700858  |
| C | -4.846567 | -3.280981 | 0.171638  | H    | -0.216460 | 5.562123  | 1.591048  |
| C | -4.510934 | -1.968334 | -0.051736 | H    | 1.662046  | 5.824069  | 3.196362  |
| C | -3.196326 | -1.610745 | -0.403932 | C    | 0.444954  | -0.952152 | 2.413598  |
| C | -2.231450 | -2.636535 | -0.480218 | C    | 0.594129  | -2.340788 | 2.378243  |
| C | -2.593407 | -3.963176 | -0.248031 | C    | -0.015775 | -0.350028 | 3.594756  |
| C | -2.784393 | -0.269949 | -0.664332 | C    | 0.305465  | -3.101552 | 3.496727  |
| C | -1.453906 | -0.055895 | -0.952657 | H    | 0.903203  | -2.816528 | 1.441412  |
| N | -0.501306 | -1.024603 | -0.908807 | C    | -0.304029 | -1.119138 | 4.702661  |
| C | -0.824996 | -2.324562 | -0.709835 | H    | -0.147200 | 0.739475  | 3.626306  |
| O | 0.037856  | -3.196867 | -0.703714 | C    | -0.139843 | -2.497528 | 4.661668  |
| C | -3.725732 | 0.852803  | -0.511813 | H    | 0.418818  | -4.191174 | 3.452815  |
| C | -3.478992 | 1.829049  | 0.453640  | H    | -0.666034 | -0.635767 | 5.617926  |
| C | -4.332071 | 2.906226  | 0.612490  | H    | -0.372839 | -3.104849 | 5.544176  |
| C | -5.458803 | 3.023747  | -0.185556 | Rh   | 1.485118  | -0.380047 | -0.634268 |
| C | -5.725362 | 2.055106  | -1.139994 |      |           |           |           |
| C | -4.867591 | 0.979900  | -1.300957 |      |           |           |           |
| C | -0.881951 | 1.214061  | -1.383495 |      |           |           |           |
| C | 0.481176  | 1.391261  | -1.094633 |      |           |           |           |
| C | -1.548090 | 2.168763  | -2.152602 | Atom | X         | Y         | Z         |
| C | -0.883752 | 3.284712  | -2.624151 | C    | -2.794755 | -2.298324 | 4.564527  |
| C | 0.456429  | 3.474832  | -2.314863 | C    | -3.968856 | -1.937793 | 3.900974  |
| C | 1.125035  | 2.545674  | -1.542035 | C    | -3.931052 | -1.468555 | 2.610838  |
| H | -4.171499 | -5.337198 | 0.244441  | C    | -2.710213 | -1.347984 | 1.923331  |
| H | -5.879057 | -3.534398 | 0.442988  | C    | -1.525342 | -1.690773 | 2.609990  |
| H | -5.274546 | -1.189895 | 0.054151  | C    | -1.587873 | -2.164034 | 3.921781  |
| H | -1.810485 | -4.726979 | -0.313695 | C    | -2.604541 | -0.864916 | 0.581419  |
| H | -2.586916 | 1.728915  | 1.089386  | C    | -1.338699 | -0.746348 | 0.069587  |
| H | -4.118742 | 3.662307  | 1.377971  | N    | -0.201817 | -1.058692 | 0.720090  |
| H | -6.137787 | 3.875480  | -0.060562 | C    | -0.212843 | -1.534996 | 1.987105  |
| H | -6.614347 | 2.141761  | -1.776859 | O    | 0.826228  | -1.819386 | 2.577671  |
| H | -5.072628 | 0.224389  | -2.071194 | C    | -3.783812 | -0.509328 | -0.224258 |
| H | -2.600036 | 2.015815  | -2.418467 | C    | -3.924965 | 0.770670  | -0.759048 |
| H | -1.417590 | 4.014060  | -3.244117 | C    | -5.015098 | 1.096311  | -1.546816 |
| H | 0.987461  | 4.364658  | -2.675421 | C    | -5.995442 | 0.152295  | -1.804843 |
| H | 2.163783  | 2.742434  | -1.254233 | C    | -5.875577 | -1.120847 | -1.269706 |
| C | 1.049590  | 2.410865  | 1.447552  | C    | -4.779752 | -1.449094 | -0.491992 |
| C | 2.091050  | 2.562590  | 2.366765  | C    | -1.054499 | -0.352484 | -1.333680 |
| C | 0.227412  | 3.505118  | 1.171271  | C    | -0.282213 | 0.793463  | -1.613993 |
| C | 2.311714  | 3.779301  | 2.985850  | C    | -1.525032 | -1.143782 | -2.387012 |
| H | 2.724341  | 1.695552  | 2.598154  | C    | -1.253445 | -0.812136 | -3.696292 |
| C | 0.445015  | 4.714247  | 1.803822  | C    | -0.478879 | 0.309064  | -3.982470 |
|   |           |           |           | C    | 0.005071  | 1.088248  | -2.954824 |















|   |           |           |           |                |           |           |           |
|---|-----------|-----------|-----------|----------------|-----------|-----------|-----------|
| C | 0.124322  | 1.724632  | -0.203399 | C              | -1.831487 | 4.789828  | 0.842143  |
| C | 1.049822  | 0.941764  | 0.401711  | H              | -2.318442 | 2.907100  | -0.075390 |
| C | 1.464929  | 1.127973  | 1.791485  | C              | -0.831891 | 5.609989  | 1.341054  |
| C | 0.488821  | 1.149531  | 2.796081  | H              | 1.286198  | 5.819678  | 1.682555  |
| H | -0.569947 | 1.111962  | 2.502358  | H              | -2.874762 | 5.128783  | 0.848859  |
| C | 0.840383  | 1.206579  | 4.132112  | H              | -1.076740 | 6.600858  | 1.740842  |
| H | 0.055778  | 1.213094  | 4.898629  | Rh             | 1.764001  | -0.770169 | -0.429386 |
| C | 2.174816  | 1.252829  | 4.503474  |                |           |           |           |
| H | 2.453931  | 1.295643  | 5.562810  |                |           |           |           |
| C | 3.154820  | 1.239316  | 3.521143  | <b>10-Rh-b</b> |           |           |           |
| H | 4.214418  | 1.283114  | 3.802751  | Atom           | X         | Y         | Z         |
| C | 2.803774  | 1.165043  | 2.186400  | O              | -0.977761 | 2.328269  | 0.610998  |
| H | 3.584988  | 1.153228  | 1.417582  | N              | 0.278025  | 0.761676  | -0.188967 |
| C | 2.437785  | -1.855055 | -2.296106 | C              | 0.210818  | 1.956856  | 0.375349  |
| C | 3.340166  | -2.159160 | -1.280800 | C              | 1.404878  | 2.684053  | 0.652354  |
| C | 3.924874  | -0.914709 | -0.810460 | C              | 1.370723  | 3.968134  | 1.205835  |
| C | 3.417775  | 0.137782  | -1.603465 | H              | 0.395714  | 4.415219  | 1.434818  |
| C | 2.430031  | -0.417515 | -2.469505 | C              | 2.537246  | 4.645086  | 1.450027  |
| C | 1.770109  | 0.281643  | -3.591159 | H              | 2.516256  | 5.652367  | 1.880698  |
| H | 1.746209  | 1.370693  | -3.442138 | C              | 3.761149  | 4.035165  | 1.150068  |
| H | 0.732611  | -0.055358 | -3.744718 | C              | 3.814936  | 2.774726  | 0.611542  |
| H | 2.319348  | 0.086319  | -4.531761 | H              | 4.787928  | 2.315121  | 0.404231  |
| C | 1.567798  | -2.778375 | -3.055128 | C              | 2.635771  | 2.052212  | 0.338929  |
| H | 1.944709  | -2.929006 | -4.082964 | C              | 2.643811  | 0.708721  | -0.148220 |
| H | 0.542909  | -2.377661 | -3.147058 | C              | 3.933905  | 0.030432  | -0.400661 |
| H | 1.496133  | -3.767606 | -2.578636 | C              | 4.402877  | -0.982980 | 0.429295  |
| C | 3.653370  | -3.478914 | -0.694284 | H              | 3.803804  | -1.281185 | 1.298059  |
| H | 2.971922  | -4.264496 | -1.053220 | C              | 5.609409  | -1.611862 | 0.172461  |
| H | 3.584206  | -3.454799 | 0.406935  | H              | 5.957720  | -2.410671 | 0.838256  |
| H | 4.683491  | -3.791503 | -0.944563 | C              | 6.375165  | -1.232215 | -0.916656 |
| C | 5.001184  | -0.863704 | 0.204498  | H              | 7.330712  | -1.729566 | -1.120847 |
| H | 5.869192  | -1.463604 | -0.124347 | C              | 5.928471  | -0.213713 | -1.743966 |
| H | 4.675364  | -1.277516 | 1.174585  | H              | 6.529305  | 0.097325  | -2.607413 |
| H | 5.360053  | 0.160692  | 0.382482  | C              | 4.720249  | 0.411053  | -1.487229 |
| C | 3.794741  | 1.568758  | -1.564721 | H              | 4.365151  | 1.213254  | -2.148157 |
| H | 4.410772  | 1.813371  | -0.685704 | C              | 1.426426  | 0.084449  | -0.341758 |
| H | 2.906581  | 2.223568  | -1.537240 | C              | 1.212779  | -1.335250 | -0.657594 |
| H | 4.376451  | 1.843622  | -2.462975 | C              | 1.892945  | -1.943416 | -1.708556 |
| H | -4.153283 | -3.710581 | 3.710485  | H              | 2.611989  | -1.350695 | -2.287548 |
| C | -0.205718 | 3.070373  | 0.325155  | C              | 1.665455  | -3.264629 | -2.045416 |
| C | 0.790767  | 3.921591  | 0.807037  | H              | 2.209757  | -3.720603 | -2.880635 |
| C | -1.520744 | 3.542071  | 0.332025  | C              | 0.733147  | -3.992172 | -1.326651 |
| C | 0.482531  | 5.170826  | 1.313823  | H              | 0.522793  | -5.036587 | -1.588719 |
| H | 1.836370  | 3.588432  | 0.773541  | C              | 0.050544  | -3.393156 | -0.283252 |



|    |           |           |           |                |           |           |           |
|----|-----------|-----------|-----------|----------------|-----------|-----------|-----------|
| C  | -0.233945 | -1.439079 | 1.569222  | <b>10-Ir-a</b> |           |           |           |
| C  | -1.065201 | -0.375124 | 1.553999  |                |           |           |           |
| C  | -2.808987 | -0.027304 | -2.160118 | Atom           | X         | Y         | Z         |
| C  | -3.525658 | 0.995489  | -1.553491 | O              | 1.093641  | -1.383721 | 1.825936  |
| C  | -3.977796 | 0.515866  | -0.255476 | N              | -0.335745 | -1.144932 | 0.239799  |
| C  | -3.602499 | -0.838901 | -0.128005 | C              | -0.131424 | -1.449346 | 1.514600  |
| C  | -2.791441 | -1.162205 | -1.256579 | C              | -1.236094 | -1.774683 | 2.350584  |
| C  | -2.306968 | -2.505131 | -1.637600 | C              | -1.065234 | -2.171169 | 3.681109  |
| H  | -2.232822 | -3.180472 | -0.773756 | H              | -0.047295 | -2.228928 | 4.085241  |
| H  | -1.314995 | -2.473665 | -2.117610 | C              | -2.155367 | -2.483543 | 4.450859  |
| H  | -3.005092 | -2.967234 | -2.361433 | H              | -2.027706 | -2.800184 | 5.491875  |
| C  | -2.101443 | -0.013191 | -3.458395 | C              | -3.437421 | -2.390961 | 3.898400  |
| H  | -2.596770 | -0.676374 | -4.190543 | C              | -3.624925 | -1.992099 | 2.598985  |
| H  | -1.064050 | -0.377837 | -3.352430 | H              | -4.641401 | -1.908921 | 2.198010  |
| H  | -2.056676 | 0.993920  | -3.898839 | C              | -2.529202 | -1.671748 | 1.775180  |
| C  | -3.776543 | 2.365610  | -2.047494 | C              | -2.683020 | -1.164367 | 0.445628  |
| H  | -3.280799 | 2.557713  | -3.010688 | C              | -4.033764 | -0.915010 | -0.102030 |
| H  | -3.419754 | 3.128115  | -1.332875 | C              | -4.527082 | 0.379340  | -0.230610 |
| H  | -4.857840 | 2.543925  | -2.188325 | H              | -3.901441 | 1.220801  | 0.095192  |
| C  | -4.828768 | 1.303529  | 0.662867  | C              | -5.787211 | 0.609826  | -0.755569 |
| H  | -5.867853 | 1.363161  | 0.288675  | H              | -6.156065 | 1.637887  | -0.852959 |
| H  | -4.466353 | 2.340039  | 0.765726  | C              | -6.581685 | -0.454020 | -1.150591 |
| H  | -4.869852 | 0.862732  | 1.670612  | H              | -7.579820 | -0.272368 | -1.566721 |
| C  | -3.953709 | -1.749726 | 0.984035  | C              | -6.108826 | -1.749525 | -1.013723 |
| H  | -4.073413 | -1.207146 | 1.935816  | H              | -6.732147 | -2.598101 | -1.321145 |
| H  | -3.182963 | -2.521477 | 1.143634  | C              | -4.846472 | -1.977129 | -0.492949 |
| H  | -4.907160 | -2.269677 | 0.780151  | H              | -4.469689 | -3.003697 | -0.390908 |
| H  | 4.687296  | 4.679930  | 0.578763  | C              | -1.544209 | -0.862880 | -0.269179 |
| C  | 0.123058  | -2.124572 | 2.880653  | C              | -1.500492 | -0.141245 | -1.553176 |
| H  | 1.065888  | -2.690777 | 2.747964  | C              | -2.223645 | -0.597808 | -2.652558 |
| C  | -1.549660 | 0.277130  | 2.818274  | H              | -2.799575 | -1.526994 | -2.556960 |
| H  | -1.732974 | -0.470584 | 3.616947  | C              | -2.231587 | 0.098989  | -3.846739 |
| H  | -2.534179 | 0.756464  | 2.640047  | H              | -2.803461 | -0.281872 | -4.700700 |
| C  | -0.935726 | -3.054421 | 3.442255  | C              | -1.522847 | 1.285694  | -3.944398 |
| H  | -0.645120 | -3.435512 | 4.436320  | H              | -1.526895 | 1.857768  | -4.880093 |
| H  | -1.908424 | -2.545518 | 3.554209  | C              | -0.811639 | 1.751722  | -2.855848 |
| H  | -1.114056 | -3.931949 | 2.799057  | H              | -0.267474 | 2.703186  | -2.929792 |
| C  | -0.589468 | 1.326806  | 3.345322  | C              | -0.753515 | 1.053838  | -1.646947 |
| H  | 0.410669  | 0.898171  | 3.531075  | C              | -0.038869 | 1.697857  | -0.508797 |
| H  | -0.466666 | 2.154142  | 2.629863  | C              | 0.930412  | 1.098300  | 0.229629  |
| H  | -0.952332 | 1.754800  | 4.295428  | C              | 1.363039  | 1.662977  | 1.516225  |
| H  | 0.354684  | -1.358676 | 3.645489  | C              | 0.408493  | 1.915710  | 2.507158  |
| Rh | -1.805678 | 0.429925  | -0.152630 | H              | -0.651145 | 1.736298  | 2.276144  |
|    |           |           |           | C              | 0.779847  | 2.374856  | 3.757792  |

|   |           |           |           |                |           |           |           |
|---|-----------|-----------|-----------|----------------|-----------|-----------|-----------|
| H | 0.010590  | 2.556288  | 4.518797  | Ir             | 1.647812  | -0.762818 | -0.212734 |
| C | 2.114355  | 2.607697  | 4.050150  |                |           |           |           |
| H | 2.409029  | 2.976219  | 5.039551  |                |           |           |           |
| C | 3.074168  | 2.361238  | 3.080550  | <b>10-Ir-b</b> |           |           |           |
| H | 4.133830  | 2.543864  | 3.298416  | Atom           | X         | Y         | Z         |
| C | 2.703608  | 1.879261  | 1.838431  | O              | -0.842229 | 2.265000  | 0.663249  |
| H | 3.470650  | 1.688666  | 1.077632  | N              | 0.421732  | 0.748076  | -0.185514 |
| C | 2.316713  | -2.309900 | -1.776493 | C              | 0.353694  | 1.933617  | 0.397528  |
| C | 3.257310  | -2.328911 | -0.747533 | C              | 1.535950  | 2.680080  | 0.654377  |
| C | 3.809305  | -0.992102 | -0.611826 | C              | 1.494050  | 3.958956  | 1.219839  |
| C | 3.244010  | -0.181800 | -1.629271 | H              | 0.518296  | 4.390317  | 1.473985  |
| C | 2.251836  | -0.960280 | -2.301482 | C              | 2.656081  | 4.649857  | 1.444390  |
| C | 1.538802  | -0.589667 | -3.541842 | H              | 2.630374  | 5.653070  | 1.884181  |
| H | 1.545083  | 0.496077  | -3.711908 | C              | 3.882002  | 4.060551  | 1.111819  |
| H | 0.486611  | -0.914580 | -3.530519 | C              | 3.942724  | 2.805676  | 0.561084  |
| H | 2.023953  | -1.065614 | -4.414463 | H              | 4.917151  | 2.362710  | 0.326500  |
| C | 1.466007  | -3.417540 | -2.262218 | C              | 2.768453  | 2.068165  | 0.308919  |
| H | 1.794859  | -3.758828 | -3.260379 | C              | 2.785475  | 0.729152  | -0.189893 |
| H | 0.412529  | -3.102978 | -2.366504 | C              | 4.084879  | 0.071081  | -0.452898 |
| H | 1.489304  | -4.288192 | -1.589947 | C              | 4.596810  | -0.895100 | 0.406229  |
| C | 3.631496  | -3.461408 | 0.126204  | H              | 4.022870  | -1.176189 | 1.296816  |
| H | 2.923317  | -4.299568 | 0.047478  | C              | 5.819052  | -1.495220 | 0.154900  |
| H | 3.670104  | -3.157507 | 1.185963  | H              | 6.201743  | -2.257128 | 0.844847  |
| H | 4.634202  | -3.847530 | -0.131844 | C              | 6.557651  | -1.131092 | -0.957883 |
| C | 4.939388  | -0.666541 | 0.287825  | H              | 7.526237  | -1.604691 | -1.157624 |
| H | 5.863227  | -1.169272 | -0.052868 | C              | 6.066694  | -0.159410 | -1.815566 |
| H | 4.753965  | -1.000293 | 1.322511  | H              | 6.646394  | 0.139008  | -2.697757 |
| H | 5.150253  | 0.412488  | 0.321264  | C              | 4.842717  | 0.436438  | -1.564055 |
| C | 3.593158  | 1.217410  | -1.962168 | H              | 4.454035  | 1.204450  | -2.246438 |
| H | 4.130102  | 1.715566  | -1.140411 | C              | 1.576236  | 0.086008  | -0.368876 |
| H | 2.697000  | 1.821179  | -2.184160 | C              | 1.380506  | -1.333871 | -0.690700 |
| H | 4.245133  | 1.253918  | -2.853318 | C              | 2.042641  | -1.915777 | -1.767976 |
| H | -4.310484 | -2.633351 | 4.516994  | H              | 2.726961  | -1.299533 | -2.364332 |
| C | -0.427143 | 3.112515  | -0.293229 | C              | 1.840554  | -3.240670 | -2.106773 |
| C | 0.530294  | 4.105383  | -0.078927 | H              | 2.370008  | -3.677454 | -2.961356 |
| C | -1.765696 | 3.505676  | -0.347542 | C              | 0.952015  | -3.996227 | -1.362303 |
| C | 0.164255  | 5.426257  | 0.108319  | H              | 0.761302  | -5.044489 | -1.624058 |
| H | 1.592146  | 3.826759  | -0.069685 | C              | 0.285006  | -3.421443 | -0.294925 |
| C | -2.135055 | 4.825021  | -0.156294 | H              | -0.441900 | -4.025917 | 0.261603  |
| H | -2.536166 | 2.749645  | -0.548935 | C              | 0.467039  | -2.087141 | 0.086849  |
| C | -1.171731 | 5.793282  | 0.076646  | C              | -0.194678 | -1.634417 | 1.352619  |
| H | 0.939146  | 6.185979  | 0.269383  | C              | -1.183386 | -0.697538 | 1.412906  |
| H | -3.195917 | 5.102372  | -0.191801 | C              | -2.458995 | 0.561575  | -2.428651 |
| H | -1.462835 | 6.840069  | 0.221989  | C              | -3.283603 | 1.335068  | -1.619363 |

|    |           |           |           |                |           |           |           |
|----|-----------|-----------|-----------|----------------|-----------|-----------|-----------|
| C  | -3.803886 | 0.498519  | -0.550876 | <b>10-Ir-c</b> |           |           |           |
| C  | -3.345153 | -0.826998 | -0.781608 |                |           |           |           |
| C  | -2.434297 | -0.780391 | -1.880648 | Atom           | X         | Y         | Z         |
| C  | -1.821834 | -1.935465 | -2.571451 | O              | -0.949833 | 2.308638  | 0.214542  |
| H  | -1.827222 | -2.840985 | -1.949537 | N              | 0.304334  | 0.640469  | -0.305966 |
| H  | -0.775919 | -1.742737 | -2.862287 | C              | 0.237598  | 1.931504  | -0.013719 |
| H  | -2.382220 | -2.161420 | -3.497782 | C              | 1.423819  | 2.712589  | 0.046153  |
| C  | -1.683330 | 0.973053  | -3.619114 | C              | 1.382310  | 4.087070  | 0.302864  |
| H  | -2.116771 | 0.549231  | -4.543493 | H              | 0.405477  | 4.562165  | 0.455981  |
| H  | -0.640744 | 0.614814  | -3.567168 | C              | 2.543275  | 4.812925  | 0.354276  |
| H  | -1.652205 | 2.066042  | -3.741023 | H              | 2.518413  | 5.890975  | 0.548147  |
| C  | -3.568549 | 2.780722  | -1.735734 | C              | 3.767425  | 4.160242  | 0.170086  |
| H  | -2.905984 | 3.279162  | -2.458446 | C              | 3.827586  | 2.811256  | -0.073355 |
| H  | -3.451775 | 3.296998  | -0.767310 | H              | 4.803395  | 2.326840  | -0.188847 |
| H  | -4.610009 | 2.951536  | -2.062749 | C              | 2.654102  | 2.035269  | -0.156100 |
| C  | -4.824688 | 0.918900  | 0.435292  | C              | 2.666404  | 0.614409  | -0.331299 |
| H  | -5.841680 | 0.887911  | 0.001946  | C              | 3.949049  | -0.096332 | -0.510745 |
| H  | -4.653386 | 1.948477  | 0.789867  | C              | 4.428145  | -1.022017 | 0.410862  |
| H  | -4.824635 | 0.263912  | 1.321531  | H              | 3.841144  | -1.232147 | 1.313231  |
| C  | -3.736164 | -2.035956 | -0.023200 | C              | 5.631574  | -1.674684 | 0.200710  |
| H  | -3.982881 | -1.794172 | 1.022532  | H              | 5.989969  | -2.401546 | 0.939799  |
| H  | -2.926232 | -2.782944 | -0.004081 | C              | 6.383381  | -1.407515 | -0.931665 |
| H  | -4.623753 | -2.510823 | -0.478016 | H              | 7.337057  | -1.922991 | -1.095642 |
| H  | 4.812630  | 4.609637  | 1.300952  | C              | 5.921565  | -0.484056 | -1.855240 |
| Ir | -1.643327 | 0.429443  | -0.227921 | H              | 6.506920  | -0.266659 | -2.756944 |
| N  | 0.321219  | -2.187698 | 2.568510  | C              | 4.715648  | 0.161554  | -1.647152 |
| N  | -2.015321 | -0.553632 | 2.497614  | H              | 4.347076  | 0.886677  | -2.385422 |
| C  | 0.262840  | -3.604132 | 2.755270  | C              | 1.453883  | -0.046355 | -0.340749 |
| H  | 0.993256  | -4.177719 | 2.135373  | C              | 1.264921  | -1.505252 | -0.301056 |
| H  | 0.488074  | -3.840247 | 3.813753  | C              | 1.846218  | -2.325992 | -1.263109 |
| H  | -0.746232 | -3.988470 | 2.529684  | H              | 2.432756  | -1.862888 | -2.067253 |
| C  | 1.652979  | -1.737103 | 2.838980  | C              | 1.707691  | -3.700142 | -1.213608 |
| H  | 2.420625  | -2.219019 | 2.184489  | H              | 2.171901  | -4.328910 | -1.981876 |
| H  | 1.723380  | -0.643334 | 2.702417  | C              | 0.985430  | -4.266294 | -0.176244 |
| H  | 1.922693  | -1.978235 | 3.885889  | H              | 0.868362  | -5.355144 | -0.112754 |
| C  | -2.241484 | -1.590869 | 3.445337  | C              | 0.402505  | -3.456444 | 0.780203  |
| H  | -1.514375 | -1.622021 | 4.283007  | H              | -0.180017 | -3.923170 | 1.585193  |
| H  | -3.253036 | -1.448671 | 3.877223  | C              | 0.494172  | -2.062222 | 0.744003  |
| H  | -2.218550 | -2.568554 | 2.938169  | C              | -0.130487 | -1.299528 | 1.869486  |
| C  | -2.321279 | 0.745117  | 2.993527  | C              | -1.067758 | -0.336013 | 1.712210  |
| H  | -2.337457 | 1.475680  | 2.172514  | C              | -2.623099 | -0.402542 | -2.162502 |
| H  | -3.314207 | 0.736067  | 3.483145  | C              | -3.359565 | 0.697561  | -1.737955 |
| H  | -1.582588 | 1.099105  | 3.748461  | C              | -3.897277 | 0.395121  | -0.419377 |
|    |           |           |           | C              | -3.555467 | -0.939979 | -0.098635 |

|                  |           |           |           |   |           |           |           |
|------------------|-----------|-----------|-----------|---|-----------|-----------|-----------|
| C                | -2.672291 | -1.413868 | -1.122091 | C | -2.218277 | -2.506883 | -0.248550 |
| C                | -2.197172 | -2.803888 | -1.295598 | C | -2.524810 | -3.847730 | -0.014577 |
| H                | -2.167270 | -3.349758 | -0.341372 | H | -1.702966 | -4.572458 | -0.018288 |
| H                | -1.182379 | -2.845871 | -1.723815 | C | -3.820059 | -4.236736 | 0.230380  |
| H                | -2.867614 | -3.360025 | -1.977757 | H | -4.058741 | -5.289891 | 0.417032  |
| C                | -1.841903 | -0.560589 | -3.407691 | C | -4.828680 | -3.272365 | 0.256018  |
| H                | -2.342652 | -1.257123 | -4.104314 | C | -4.547049 | -1.947873 | 0.020555  |
| H                | -0.843643 | -0.985019 | -3.200811 | H | -5.354346 | -1.208885 | 0.060060  |
| H                | -1.696237 | 0.392660  | -3.937288 | C | -3.234316 | -1.529894 | -0.256777 |
| C                | -3.554553 | 1.990707  | -2.428952 | C | -2.873383 | -0.168703 | -0.509675 |
| H                | -2.942804 | 2.068896  | -3.340223 | C | -3.883773 | 0.904253  | -0.439841 |
| H                | -3.294559 | 2.845739  | -1.781033 | C | -3.753581 | 1.903584  | 0.522557  |
| H                | -4.609785 | 2.127112  | -2.727135 | H | -2.888796 | 1.872539  | 1.200764  |
| C                | -4.798874 | 1.292906  | 0.336623  | C | -4.684018 | 2.920514  | 0.626111  |
| H                | -5.823729 | 1.269611  | -0.077243 | H | -4.561663 | 3.696584  | 1.391462  |
| H                | -4.455438 | 2.339649  | 0.295853  | C | -5.773059 | 2.954579  | -0.230826 |
| H                | -4.865518 | 1.008426  | 1.398245  | H | -6.513876 | 3.758849  | -0.150676 |
| C                | -4.008550 | -1.711870 | 1.079681  | C | -5.919902 | 1.965781  | -1.189448 |
| H                | -4.254990 | -1.056963 | 1.930128  | H | -6.775711 | 1.988399  | -1.874932 |
| H                | -3.239270 | -2.421636 | 1.423520  | C | -4.984384 | 0.949898  | -1.293606 |
| H                | -4.915157 | -2.295594 | 0.839005  | H | -5.098167 | 0.174963  | -2.063707 |
| H                | 4.699734  | 4.735194  | 0.231159  | C | -1.548531 | 0.127100  | -0.715070 |
| C                | 0.336000  | -1.771981 | 3.226471  | C | -1.053057 | 1.446152  | -1.069365 |
| H                | -0.191246 | -1.224633 | 4.024798  | C | -1.649791 | 2.213223  | -2.063151 |
| H                | 0.069011  | -2.837767 | 3.383872  | H | -2.543158 | 1.820969  | -2.563966 |
| C                | -1.683817 | 0.368821  | 2.894402  | C | -1.124751 | 3.433905  | -2.438620 |
| H                | -2.634475 | 0.841557  | 2.576964  | H | -1.599756 | 4.019170  | -3.233218 |
| H                | -1.972480 | -0.352784 | 3.687565  | C | 0.024555  | 3.895871  | -1.807719 |
| C                | 1.827975  | -1.621198 | 3.426246  | H | 0.460873  | 4.859803  | -2.097609 |
| H                | 2.150031  | -0.578529 | 3.250197  | C | 0.632361  | 3.150143  | -0.819903 |
| H                | 2.132561  | -1.901072 | 4.448646  | H | 1.542531  | 3.527428  | -0.337924 |
| H                | 2.395431  | -2.260610 | 2.727916  | C | 0.114059  | 1.904983  | -0.424395 |
| C                | -0.790995 | 1.440593  | 3.486547  | C | 0.732222  | 1.159873  | 0.665002  |
| H                | -0.519459 | 2.189149  | 2.724521  | C | 0.629423  | -0.228982 | 0.909875  |
| H                | -1.289895 | 1.969580  | 4.316981  | C | 2.616947  | -0.073604 | -2.745634 |
| H                | 0.149838  | 1.016343  | 3.877861  | C | 2.357966  | -1.459371 | -2.496014 |
| Ir               | -1.728251 | 0.272406  | -0.117900 | C | 3.160976  | -1.900330 | -1.395742 |
| <b>TS11-Rh-a</b> |           |           |           | C | 3.803961  | -0.760349 | -0.873723 |
|                  |           |           |           | C | 3.464151  | 0.368422  | -1.710794 |
|                  |           |           |           | C | 3.954916  | 1.749409  | -1.508318 |
| Atom             | X         | Y         | Z         | H | 5.000262  | 1.858222  | -1.851087 |
| O                | 0.082393  | -2.948645 | -0.369378 | H | 3.932229  | 2.040356  | -0.443107 |
| N                | -0.539363 | -0.796377 | -0.589630 | H | 3.349647  | 2.482763  | -2.064285 |
| C                | -0.823662 | -2.134149 | -0.412208 | C | 1.992803  | 0.769610  | -3.791725 |

|                    |           |           |           |   |           |           |           |
|--------------------|-----------|-----------|-----------|---|-----------|-----------|-----------|
| H                  | 1.076848  | 0.304992  | -4.190145 | N | -0.450988 | -0.659578 | 0.043009  |
| H                  | 2.665409  | 0.945175  | -4.651392 | C | -0.470882 | -1.822935 | 0.761022  |
| H                  | 1.700692  | 1.759722  | -3.398709 | C | -1.686457 | -2.299839 | 1.291824  |
| C                  | 1.511011  | -2.347430 | -3.322576 | C | -1.710003 | -3.424873 | 2.128979  |
| H                  | 1.082119  | -3.161292 | -2.719942 | H | -0.762083 | -3.924267 | 2.361777  |
| H                  | 2.104821  | -2.806940 | -4.133941 | C | -2.893723 | -3.861292 | 2.657315  |
| H                  | 0.678827  | -1.803500 | -3.796208 | H | -2.918501 | -4.731784 | 3.322301  |
| C                  | 3.307854  | -3.296940 | -0.935060 | C | -4.077387 | -3.170810 | 2.358247  |
| H                  | 3.933906  | -3.889813 | -1.628478 | C | -4.076084 | -2.083225 | 1.523138  |
| H                  | 2.333026  | -3.803594 | -0.857910 | H | -5.016831 | -1.563142 | 1.312181  |
| H                  | 3.788938  | -3.345858 | 0.055205  | C | -2.882211 | -1.619868 | 0.936658  |
| C                  | 4.805250  | -0.742339 | 0.217236  | C | -2.830976 | -0.518294 | 0.031843  |
| H                  | 4.527063  | -1.406979 | 1.052645  | C | -4.080712 | 0.155874  | -0.370776 |
| H                  | 4.948544  | 0.268621  | 0.630173  | C | -4.304662 | 1.491427  | -0.045763 |
| H                  | 5.792970  | -1.080353 | -0.147970 | H | -3.536319 | 2.039057  | 0.516179  |
| H                  | -5.862151 | -3.572371 | 0.470139  | C | -5.469660 | 2.128626  | -0.434159 |
| C                  | 0.331356  | -0.938378 | 2.126078  | H | -5.626636 | 3.181375  | -0.170549 |
| C                  | 0.954203  | -2.157362 | 2.404042  | C | -6.438367 | 1.438543  | -1.146004 |
| C                  | -0.629389 | -0.438957 | 3.012727  | H | -7.362099 | 1.942897  | -1.452935 |
| C                  | 0.634369  | -2.853761 | 3.552901  | C | -6.233191 | 0.105937  | -1.465295 |
| H                  | 1.694303  | -2.543682 | 1.690962  | H | -6.993447 | -0.448894 | -2.028366 |
| C                  | -0.953699 | -1.144404 | 4.153203  | C | -5.064642 | -0.529289 | -1.080672 |
| H                  | -1.118518 | 0.518930  | 2.784649  | H | -4.898247 | -1.582200 | -1.344957 |
| C                  | -0.320056 | -2.350097 | 4.423991  | C | -1.605561 | -0.070479 | -0.420188 |
| H                  | 1.129690  | -3.806451 | 3.772861  | C | -1.341483 | 1.038251  | -1.310497 |
| H                  | -1.709776 | -0.754005 | 4.844499  | C | -2.136441 | 1.322816  | -2.423535 |
| C                  | 1.442644  | 1.900784  | 1.731407  | H | -2.974710 | 0.657862  | -2.661392 |
| C                  | 0.919266  | 3.083197  | 2.258363  | C | -1.865863 | 2.399731  | -3.237143 |
| C                  | 2.609382  | 1.388527  | 2.298135  | H | -2.486710 | 2.588334  | -4.119998 |
| C                  | 1.548468  | 3.729179  | 3.305660  | C | -0.788704 | 3.233080  | -2.938073 |
| H                  | -0.008232 | 3.495458  | 1.839464  | H | -0.561374 | 4.089958  | -3.584092 |
| C                  | 3.236454  | 2.032638  | 3.349771  | C | 0.003610  | 2.973161  | -1.846659 |
| H                  | 3.023217  | 0.453967  | 1.898917  | H | 0.859304  | 3.624043  | -1.628682 |
| C                  | 2.711773  | 3.209809  | 3.855175  | C | -0.226809 | 1.867191  | -1.007860 |
| H                  | 1.117203  | 4.654069  | 3.707865  | C | 0.561960  | 1.645732  | 0.173991  |
| H                  | 4.152737  | 1.608384  | 3.778134  | C | 0.776305  | 0.353445  | 0.670844  |
| Rh                 | 1.603500  | -0.348137 | -0.745350 | C | 2.008573  | -0.936740 | -2.819635 |
| H                  | 3.208707  | 3.726570  | 4.684712  | C | 2.251074  | -2.271998 | -2.441548 |
| H                  | -0.578646 | -2.908691 | 5.331945  | C | 3.213656  | -2.224568 | -1.380252 |
|                    |           |           |           | C | 3.663084  | -0.879925 | -1.205737 |
|                    |           |           |           | C | 2.882188  | -0.072143 | -2.061995 |
|                    |           |           |           | C | 3.063514  | 1.383203  | -2.258353 |
|                    |           |           |           | H | 3.036589  | 1.942719  | -1.307643 |
|                    |           |           |           | H | 2.289660  | 1.813275  | -2.910119 |
| <b>TS11-Rh-a-i</b> |           |           |           |   |           |           |           |
| Atom               | X         | Y         | Z         |   |           |           |           |
| O                  | 0.662875  | -2.346623 | 0.845719  |   |           |           |           |

|                  |           |           |           |      |           |           |           |
|------------------|-----------|-----------|-----------|------|-----------|-----------|-----------|
| H                | 4.043289  | 1.590510  | -2.726695 | Atom | X         | Y         | Z         |
| C                | 1.043402  | -0.483086 | -3.845157 | C    | 3.295392  | 4.523142  | -0.125396 |
| H                | 0.682771  | 0.539473  | -3.650055 | C    | 4.399966  | 3.673570  | -0.069837 |
| H                | 0.160019  | -1.140344 | -3.897170 | C    | 4.247315  | 2.306817  | -0.104786 |
| H                | 1.505588  | -0.479642 | -4.849422 | C    | 2.971321  | 1.726957  | -0.198272 |
| C                | 1.626051  | -3.491644 | -2.999802 | C    | 1.863940  | 2.594828  | -0.218551 |
| H                | 1.464744  | -4.262318 | -2.227977 | C    | 2.035175  | 3.978616  | -0.195362 |
| H                | 2.250196  | -3.955254 | -3.787084 | C    | 2.743398  | 0.310654  | -0.246259 |
| H                | 0.644845  | -3.278931 | -3.454653 | C    | 1.454660  | -0.157434 | -0.223912 |
| C                | 3.732058  | -3.402035 | -0.650828 | N    | 0.360607  | 0.692300  | -0.070508 |
| H                | 2.971399  | -4.192413 | -0.551762 | C    | 0.512177  | 2.069942  | -0.195825 |
| H                | 4.073771  | -3.139863 | 0.363053  | O    | -0.472040 | 2.779145  | -0.220134 |
| H                | 4.594773  | -3.843698 | -1.182461 | C    | 3.900041  | -0.605076 | -0.282333 |
| C                | 4.762790  | -0.416537 | -0.331235 | C    | 4.102236  | -1.550071 | 0.720113  |
| H                | 4.905853  | -1.072909 | 0.541911  | C    | 5.182350  | -2.413183 | 0.673770  |
| H                | 4.581467  | 0.602835  | 0.048736  | C    | 6.089473  | -2.340504 | -0.372173 |
| H                | 5.727808  | -0.389308 | -0.872861 | C    | 5.908406  | -1.396334 | -1.369218 |
| H                | -5.023685 | -3.506166 | 2.800160  | C    | 4.823525  | -0.538563 | -1.325088 |
| Rh               | 1.513165  | -1.097312 | -0.649219 | C    | 1.063721  | -1.550482 | -0.334400 |
| C                | 0.959416  | 0.162842  | 2.130436  | C    | -0.065572 | -1.965089 | 0.405990  |
| C                | 2.029461  | -0.545837 | 2.665849  | C    | 1.686596  | -2.445972 | -1.199454 |
| C                | 0.013520  | 0.704403  | 2.999007  | C    | 1.243841  | -3.748739 | -1.322997 |
| C                | 2.175406  | -0.674750 | 4.035027  | C    | 0.160297  | -4.173620 | -0.563102 |
| H                | 2.757250  | -0.998269 | 1.977228  | C    | -0.479256 | -3.302957 | 0.290769  |
| C                | 0.145694  | 0.560671  | 4.368713  | C    | -0.595553 | 0.362321  | 1.293658  |
| H                | -0.835808 | 1.260174  | 2.575729  | C    | -0.758645 | -1.054773 | 1.290496  |
| C                | 1.233088  | -0.122597 | 4.890000  | H    | 3.431526  | 5.609875  | -0.099276 |
| H                | 3.033601  | -1.221327 | 4.444015  | H    | 5.132381  | 1.664286  | -0.048025 |
| H                | -0.607317 | 0.991701  | 5.039549  | H    | 1.139520  | 4.610409  | -0.215089 |
| H                | 1.344300  | -0.232876 | 5.975617  | H    | 3.381156  | -1.612762 | 1.546209  |
| C                | 1.164512  | 2.792328  | 0.858882  | H    | 5.321399  | -3.153487 | 1.470943  |
| C                | 0.470829  | 3.998765  | 1.014032  | H    | 6.946041  | -3.023765 | -0.408298 |
| C                | 2.460468  | 2.724599  | 1.384908  | H    | 6.619181  | -1.331777 | -2.201827 |
| C                | 1.040436  | 5.073491  | 1.670179  | H    | 4.674653  | 0.199312  | -2.124967 |
| H                | -0.550032 | 4.081082  | 0.618808  | H    | 2.530330  | -2.102587 | -1.808144 |
| C                | 3.026919  | 3.796399  | 2.049065  | H    | 1.742011  | -4.433595 | -2.017375 |
| H                | 3.036982  | 1.798936  | 1.256838  | H    | -0.195830 | -5.208138 | -0.645659 |
| C                | 2.320575  | 4.979391  | 2.196872  | H    | -1.343510 | -3.636338 | 0.877612  |
| H                | 0.467344  | 6.001736  | 1.784780  | C    | -3.142160 | 1.328896  | -1.641692 |
| H                | 4.045263  | 3.710245  | 2.447474  | C    | -3.891753 | 0.922710  | -0.532204 |
| H                | 2.769840  | 5.833609  | 2.716578  | C    | -3.852622 | -0.514288 | -0.491477 |
|                  |           |           |           | C    | -2.665224 | 0.140343  | -2.316058 |
| <b>TS11-Rh-b</b> |           |           |           | C    | -3.182595 | -0.989572 | -1.666467 |
|                  |           |           |           | C    | -1.829281 | 0.160211  | -3.538889 |



|                    |           |           |           |   |           |           |           |
|--------------------|-----------|-----------|-----------|---|-----------|-----------|-----------|
| H                  | -2.427377 | 0.410769  | -4.434358 | N | 0.357766  | 0.496059  | 0.127889  |
| H                  | -1.028707 | 0.915600  | -3.470240 | C | 0.279226  | 1.857121  | 0.193859  |
| H                  | -1.347385 | -0.812556 | -3.724092 | C | 1.455267  | 2.629729  | 0.252969  |
| C                  | -4.610433 | 1.791595  | 0.426554  | C | 1.389020  | 4.017784  | 0.462306  |
| H                  | -4.192805 | 2.810888  | 0.446600  | H | 0.401516  | 4.484670  | 0.561961  |
| H                  | -5.682988 | 1.883389  | 0.171385  | C | 2.536148  | 4.753385  | 0.564446  |
| H                  | -4.563266 | 1.399134  | 1.456589  | H | 2.489986  | 5.833839  | 0.741385  |
| C                  | -2.931634 | 2.709120  | -2.124993 | C | 3.780957  | 4.110021  | 0.459202  |
| H                  | -1.915143 | 2.857905  | -2.521288 | C | 3.866647  | 2.762268  | 0.230447  |
| H                  | -3.635798 | 2.957942  | -2.941595 | H | 4.852068  | 2.288226  | 0.158000  |
| H                  | -3.074035 | 3.453083  | -1.326330 | C | 2.706619  | 1.970286  | 0.093952  |
| C                  | -4.608648 | -1.389540 | 0.434620  | C | 2.733320  | 0.578102  | -0.180601 |
| H                  | -4.000177 | -2.242795 | 0.783963  | C | 4.024692  | -0.106640 | -0.380553 |
| H                  | -4.966032 | -0.850031 | 1.324884  | C | 4.432998  | -1.107254 | 0.498874  |
| H                  | -5.497647 | -1.814195 | -0.067860 | H | 3.779895  | -1.372368 | 1.340989  |
| C                  | -3.040735 | -2.411499 | -2.042499 | C | 5.630819  | -1.772317 | 0.310931  |
| H                  | -2.257424 | -2.564213 | -2.802326 | H | 5.933197  | -2.559210 | 1.012502  |
| H                  | -2.774978 | -3.043915 | -1.177473 | C | 6.449001  | -1.444430 | -0.758970 |
| H                  | -3.982000 | -2.819106 | -2.457887 | H | 7.397858  | -1.972545 | -0.909805 |
| H                  | 5.408764  | 4.098082  | 0.006345  | C | 6.063561  | -0.440784 | -1.632605 |
| N                  | -1.489302 | -1.657264 | 2.341655  | H | 6.705642  | -0.172954 | -2.480526 |
| N                  | -0.428884 | 1.125819  | 2.383426  | C | 4.862402  | 0.221970  | -1.444759 |
| C                  | -0.683684 | -2.371208 | 3.291703  | H | 4.551664  | 1.007428  | -2.146625 |
| H                  | -1.326151 | -3.051033 | 3.880941  | C | 1.542202  | -0.133248 | -0.191451 |
| H                  | 0.079555  | -2.980460 | 2.782435  | C | 1.354806  | -1.534531 | -0.466869 |
| H                  | -0.168484 | -1.693730 | 4.012434  | C | 2.120974  | -2.246332 | -1.394418 |
| C                  | -2.464796 | -0.864857 | 3.023804  | H | 2.907267  | -1.723349 | -1.949771 |
| H                  | -3.212861 | -1.535119 | 3.488477  | C | 1.878131  | -3.575308 | -1.656977 |
| H                  | -2.037093 | -0.229747 | 3.832294  | H | 2.475098  | -4.101293 | -2.410072 |
| H                  | -2.979255 | -0.201079 | 2.310784  | C | 0.851745  | -4.236288 | -0.978448 |
| C                  | -1.111708 | 2.364720  | 2.572710  | H | 0.643375  | -5.292062 | -1.191925 |
| H                  | -1.454189 | 2.435892  | 3.624175  | C | 0.087702  | -3.564224 | -0.059852 |
| H                  | -0.464562 | 3.241022  | 2.365528  | H | -0.731842 | -4.077973 | 0.457455  |
| H                  | -1.984131 | 2.410827  | 1.902085  | C | 0.292978  | -2.195941 | 0.215179  |
| C                  | 0.778390  | 0.988081  | 3.136974  | C | -0.456723 | -1.538057 | 1.233290  |
| H                  | 1.221815  | -0.005646 | 2.957819  | C | -0.660686 | -0.141981 | 1.250373  |
| H                  | 1.526190  | 1.761417  | 2.850721  | C | -2.714768 | -0.427569 | -2.216634 |
| H                  | 0.574557  | 1.097761  | 4.219938  | C | -3.080199 | 0.924717  | -2.186677 |
| Rh                 | -1.773898 | 0.092373  | -0.262233 | C | -3.840157 | 1.126675  | -0.973039 |
|                    |           |           |           | C | -4.048168 | -0.124059 | -0.337764 |
|                    |           |           |           | C | -3.260460 | -1.071311 | -1.040653 |
|                    |           |           |           | C | -3.199358 | -2.525382 | -0.768626 |
|                    |           |           |           | H | -3.074358 | -2.746060 | 0.304563  |
|                    |           |           |           | H | -2.360275 | -3.004111 | -1.296055 |
| <b>TS11-Rh-b-i</b> |           |           |           |   |           |           |           |
| Atom               | X         | Y         | Z         |   |           |           |           |
| O                  | -0.899977 | 2.284268  | 0.196020  |   |           |           |           |

|                  |           |           |           |   |           |           |           |
|------------------|-----------|-----------|-----------|---|-----------|-----------|-----------|
| H                | -4.126023 | -3.029084 | -1.101794 | C | 1.759915  | 2.661906  | -0.006326 |
| C                | -1.865980 | -1.107862 | -3.219282 | C | 1.955714  | 4.038456  | 0.112213  |
| H                | -1.101382 | -1.748127 | -2.741861 | H | 1.069520  | 4.679442  | 0.183589  |
| H                | -1.335688 | -0.390383 | -3.864159 | C | 3.223970  | 4.564785  | 0.152600  |
| H                | -2.463099 | -1.765881 | -3.877343 | H | 3.375800  | 5.646166  | 0.245476  |
| C                | -2.755880 | 1.984304  | -3.167728 | C | 4.320425  | 3.703430  | 0.090884  |
| H                | -2.496636 | 2.933851  | -2.669695 | C | 4.148337  | 2.345803  | -0.032558 |
| H                | -3.607904 | 2.199777  | -3.839534 | H | 5.026984  | 1.692641  | -0.062858 |
| H                | -1.900405 | 1.709308  | -3.804527 | C | 2.859673  | 1.784135  | -0.105183 |
| C                | -4.412829 | 2.422824  | -0.548276 | C | 2.610264  | 0.379593  | -0.224818 |
| H                | -5.288494 | 2.695260  | -1.166187 | C | 3.734002  | -0.572822 | -0.288084 |
| H                | -3.681157 | 3.241524  | -0.650431 | C | 3.888761  | -1.567586 | 0.674742  |
| H                | -4.742522 | 2.398587  | 0.502375  | H | 3.157953  | -1.632981 | 1.492922  |
| C                | -4.946959 | -0.381841 | 0.810008  | C | 4.936041  | -2.469408 | 0.604430  |
| H                | -4.779392 | 0.310364  | 1.654487  | H | 5.036389  | -3.246619 | 1.371941  |
| H                | -4.827322 | -1.405620 | 1.197537  | C | 5.860576  | -2.386910 | -0.425238 |
| H                | -6.008458 | -0.273196 | 0.518659  | H | 6.691411  | -3.100008 | -0.479667 |
| H                | 4.701591  | 4.696786  | 0.562664  | C | 5.726379  | -1.396645 | -1.384511 |
| Rh               | -1.860093 | 0.492016  | -0.362164 | H | 6.449221  | -1.325139 | -2.206234 |
| N                | -0.670261 | 0.498810  | 2.458915  | C | 4.673780  | -0.500880 | -1.316508 |
| N                | -1.078764 | -2.336918 | 2.182463  | H | 4.561356  | 0.271624  | -2.089285 |
| C                | -1.598280 | 1.505838  | 2.830296  | C | 1.299490  | -0.043468 | -0.235565 |
| H                | -1.994825 | 1.298134  | 3.846700  | C | 0.891236  | -1.430970 | -0.432725 |
| H                | -1.146790 | 2.520917  | 2.850806  | C | 1.460460  | -2.195474 | -1.444448 |
| H                | -2.440070 | 1.516674  | 2.119542  | H | 2.239469  | -1.738482 | -2.065527 |
| C                | 0.480006  | 0.417440  | 3.295744  | C | 1.053451  | -3.491277 | -1.696282 |
| H                | 1.148182  | -0.386176 | 2.941737  | H | 1.508436  | -4.067577 | -2.508792 |
| H                | 1.056749  | 1.370473  | 3.301419  | C | 0.060209  | -4.041677 | -0.900905 |
| H                | 0.198151  | 0.195478  | 4.346419  | H | -0.272953 | -5.073537 | -1.067563 |
| C                | -2.194460 | -1.824312 | 2.904910  | C | -0.525601 | -3.300445 | 0.104159  |
| H                | -2.779286 | -1.146794 | 2.265036  | H | -1.318694 | -3.766497 | 0.697851  |
| H                | -2.838063 | -2.670367 | 3.217098  | C | -0.156213 | -1.966163 | 0.355771  |
| H                | -1.912825 | -1.265782 | 3.825321  | C | -0.829684 | -1.231189 | 1.424748  |
| C                | -0.258417 | -3.178383 | 3.001540  | C | -0.885002 | 0.156071  | 1.640495  |
| H                | 0.611388  | -3.548731 | 2.438395  | C | -4.031911 | 0.131573  | -0.049174 |
| H                | 0.113529  | -2.645104 | 3.906651  | C | -3.582956 | -0.824143 | -1.039137 |
| H                | -0.842896 | -4.051093 | 3.348121  | C | -2.858576 | -0.130744 | -2.012819 |
|                  |           |           |           | C | -2.860586 | 1.262331  | -1.639434 |
|                  |           |           |           | C | -3.662045 | 1.432486  | -0.482247 |
|                  |           |           |           | C | -4.027972 | 2.719141  | 0.147095  |
|                  |           |           |           | H | -3.218903 | 3.460677  | 0.053650  |
|                  |           |           |           | H | -4.246119 | 2.605366  | 1.221121  |
|                  |           |           |           | H | -4.930175 | 3.158100  | -0.319430 |
|                  |           |           |           | C | -4.904073 | -0.190023 | 1.104685  |
| <b>TS11-Rh-c</b> |           |           |           |   |           |           |           |
| Atom             | X         | Y         | Z         |   |           |           |           |
| O                | -0.569926 | 2.877960  | 0.202508  |   |           |           |           |
| N                | 0.237651  | 0.796489  | -0.081990 |   |           |           |           |
| C                | 0.399346  | 2.148880  | 0.041837  |   |           |           |           |

|                    |           |           |           |   |           |           |           |
|--------------------|-----------|-----------|-----------|---|-----------|-----------|-----------|
| H                  | -5.969451 | -0.224239 | 0.808558  | C | 3.655193  | 2.839433  | 0.118777  |
| H                  | -4.813377 | 0.559247  | 1.907146  | H | 4.635489  | 2.364587  | 0.000371  |
| H                  | -4.663931 | -1.172745 | 1.542646  | C | 2.490739  | 2.049168  | 0.045536  |
| C                  | -3.810418 | -2.283156 | -0.965338 | C | 2.506338  | 0.650716  | -0.231291 |
| H                  | -4.796678 | -2.561320 | -1.379416 | C | 3.786236  | -0.032337 | -0.501544 |
| H                  | -3.789153 | -2.642047 | 0.077448  | C | 4.237510  | -1.045167 | 0.342079  |
| H                  | -3.045746 | -2.850658 | -1.519873 | H | 3.625938  | -1.324364 | 1.211058  |
| C                  | -2.140282 | -0.696485 | -3.178611 | C | 5.427423  | -1.702174 | 0.086292  |
| H                  | -1.132766 | -0.257893 | -3.285457 | H | 5.764997  | -2.498288 | 0.760638  |
| H                  | -2.672601 | -0.508576 | -4.129445 | C | 6.192474  | -1.354194 | -1.015603 |
| H                  | -2.005893 | -1.787123 | -3.089450 | H | 7.135170  | -1.875576 | -1.219341 |
| C                  | -2.250062 | 2.341532  | -2.445398 | C | 5.760825  | -0.341262 | -1.856598 |
| H                  | -1.316124 | 2.010926  | -2.927944 | H | 6.359486  | -0.060173 | -2.731684 |
| H                  | -2.015341 | 3.227118  | -1.838438 | C | 4.568190  | 0.313662  | -1.601305 |
| H                  | -2.935453 | 2.652952  | -3.255612 | H | 4.220650  | 1.105909  | -2.277774 |
| H                  | 5.337078  | 4.112369  | 0.145064  | C | 1.318404  | -0.055606 | -0.193146 |
| Rh                 | -1.834980 | 0.130439  | 0.001789  | C | 1.137295  | -1.469640 | -0.431061 |
| C                  | -1.551114 | -2.019216 | 2.499574  | C | 1.822404  | -2.146970 | -1.441261 |
| H                  | -2.331825 | -2.649904 | 2.025646  | H | 2.458292  | -1.574371 | -2.126489 |
| H                  | -2.125297 | -1.318633 | 3.136778  | C | 1.698594  | -3.508777 | -1.601297 |
| C                  | -0.577277 | 0.997729  | 2.799771  | H | 2.226092  | -4.017940 | -2.415565 |
| H                  | -1.318635 | 0.708521  | 3.578125  | C | 0.895422  | -4.227357 | -0.717561 |
| H                  | -0.810931 | 2.049863  | 2.554393  | H | 0.796217  | -5.314658 | -0.825975 |
| C                  | -0.646988 | -2.866915 | 3.363821  | C | 0.208322  | -3.578630 | 0.279020  |
| H                  | 0.063322  | -2.244569 | 3.932054  | H | -0.440447 | -4.162821 | 0.943168  |
| H                  | -1.231351 | -3.449129 | 4.094003  | C | 0.266910  | -2.180560 | 0.440445  |
| H                  | -0.053897 | -3.578121 | 2.767430  | C | -0.384363 | -1.518187 | 1.537604  |
| C                  | 0.831701  | 0.846873  | 3.331030  | C | -0.764812 | -0.184037 | 1.471473  |
| H                  | 1.573153  | 1.192593  | 2.590883  | C | -2.937242 | -0.253187 | -2.103373 |
| H                  | 0.970193  | 1.447441  | 4.243602  | C | -3.562469 | 0.913295  | -1.680372 |
| H                  | 1.067138  | -0.202854 | 3.572733  | C | -4.093961 | 0.672575  | -0.343758 |
|                    |           |           |           | C | -3.872261 | -0.680449 | -0.009575 |
|                    |           |           |           | C | -3.052052 | -1.225602 | -1.035384 |
|                    |           |           |           | C | -2.638131 | -2.639866 | -1.149258 |
|                    |           |           |           | H | -2.523058 | -3.113546 | -0.161778 |
|                    |           |           |           | H | -1.678406 | -2.752348 | -1.679608 |
|                    |           |           |           | H | -3.393645 | -3.222865 | -1.709532 |
|                    |           |           |           | C | -2.199994 | -0.498806 | -3.360962 |
|                    |           |           |           | H | -1.219542 | -0.969018 | -3.165256 |
|                    |           |           |           | H | -2.015724 | 0.429117  | -3.923253 |
|                    |           |           |           | H | -2.751650 | -1.187153 | -4.027733 |
|                    |           |           |           | C | -3.687195 | 2.199761  | -2.399681 |
|                    |           |           |           | H | -3.385261 | 3.054930  | -1.771048 |
|                    |           |           |           | H | -4.732036 | 2.389267  | -2.708518 |
| <b>TS11-Rh-c-i</b> |           |           |           |   |           |           |           |
| Atom               | X         | Y         | Z         |   |           |           |           |
| O                  | -1.108619 | 2.331971  | 0.363670  |   |           |           |           |
| N                  | 0.158464  | 0.571658  | 0.183222  |   |           |           |           |
| C                  | 0.076808  | 1.927736  | 0.285598  |   |           |           |           |
| C                  | 1.252208  | 2.708242  | 0.272762  |   |           |           |           |
| C                  | 1.194019  | 4.096125  | 0.472582  |   |           |           |           |
| H                  | 0.213182  | 4.563198  | 0.623356  |   |           |           |           |
| C                  | 2.344644  | 4.834707  | 0.500310  |   |           |           |           |
| H                  | 2.306547  | 5.917215  | 0.664499  |   |           |           |           |
| C                  | 3.580282  | 4.190817  | 0.338787  |   |           |           |           |

|    |           |           |           |   |           |           |           |
|----|-----------|-----------|-----------|---|-----------|-----------|-----------|
| H  | -3.066938 | 2.226384  | -3.308826 | H | -3.189785 | 2.029406  | 1.094278  |
| C  | -4.876174 | 1.668079  | 0.422548  | C | -4.974783 | 2.950601  | 0.308123  |
| H  | -5.919941 | 1.723703  | 0.060473  | H | -4.924216 | 3.801046  | 0.998524  |
| H  | -4.451148 | 2.680857  | 0.326039  | C | -6.004969 | 2.864868  | -0.615248 |
| H  | -4.911896 | 1.426658  | 1.496224  | H | -6.771052 | 3.647659  | -0.661673 |
| C  | -4.299061 | -1.390434 | 1.216399  | C | -6.061561 | 1.781956  | -1.477948 |
| H  | -4.636401 | -0.692549 | 1.998542  | H | -6.870327 | 1.708193  | -2.215064 |
| H  | -3.477498 | -1.991985 | 1.644310  | C | -5.091158 | 0.796059  | -1.422801 |
| H  | -5.134377 | -2.086752 | 1.016164  | H | -5.130732 | -0.052036 | -2.119467 |
| H  | 4.505313  | 4.778136  | 0.388861  | C | -1.677752 | 0.142465  | -0.628337 |
| Rh | -1.948459 | 0.447202  | -0.145771 | C | -1.196588 | 1.454081  | -1.030783 |
| C  | -0.621447 | -2.320894 | 2.787974  | C | -1.786321 | 2.168063  | -2.068842 |
| H  | -1.134396 | -1.701624 | 3.543922  | H | -2.665900 | 1.743593  | -2.567782 |
| H  | -1.346844 | -3.135482 | 2.567614  | C | -1.270550 | 3.377031  | -2.490714 |
| C  | -0.880532 | 0.669185  | 2.703829  | H | -1.741349 | 3.920267  | -3.317148 |
| H  | -1.217003 | 1.680587  | 2.428815  | C | -0.136552 | 3.879896  | -1.864621 |
| H  | -1.715318 | 0.260630  | 3.308131  | H | 0.292749  | 4.835811  | -2.189682 |
| C  | 0.617147  | -2.940770 | 3.405076  | C | 0.467757  | 3.182813  | -0.841554 |
| H  | 1.365412  | -2.174640 | 3.669268  | H | 1.371775  | 3.588943  | -0.371589 |
| H  | 0.366907  | -3.495945 | 4.324829  | C | -0.042337 | 1.950503  | -0.396395 |
| H  | 1.112155  | -3.646156 | 2.718482  | C | 0.632974  | 1.224126  | 0.671704  |
| C  | 0.385631  | 0.764576  | 3.528029  | C | 0.495787  | -0.164052 | 1.013914  |
| H  | 0.657650  | -0.189418 | 4.003480  | C | 2.499204  | -0.256289 | -2.684866 |
| H  | 1.241783  | 1.071483  | 2.900568  | C | 2.283142  | -1.624493 | -2.299418 |
| H  | 0.280665  | 1.514495  | 4.328810  | C | 3.095481  | -1.926414 | -1.171098 |

### TS11-Ir-a

| Atom | X         | Y         | Z         |   |          |           |           |
|------|-----------|-----------|-----------|---|----------|-----------|-----------|
| O    | -0.025269 | -2.911329 | -0.148004 | H | 3.843483 | 2.097219  | -0.639337 |
| N    | -0.657412 | -0.765767 | -0.449317 | H | 3.161527 | 2.385070  | -2.253722 |
| C    | -0.933497 | -2.106110 | -0.237013 | H | 4.841632 | 1.825337  | -2.086295 |
| C    | -2.327532 | -2.487472 | -0.090683 | C | 1.850933 | 0.437352  | -3.822162 |
| C    | -2.621124 | -3.826557 | 0.167855  | H | 0.856481 | 0.015208  | -4.040821 |
| H    | -1.790106 | -4.540165 | 0.200052  | H | 2.443577 | 0.359564  | -4.752566 |
| C    | -3.916927 | -4.226749 | 0.388505  | H | 1.703269 | 1.512116  | -3.619904 |
| H    | -4.147586 | -5.278591 | 0.591388  | C | 1.442754 | -2.592312 | -3.040937 |
| C    | -4.936967 | -3.275348 | 0.369772  | H | 1.978817 | -2.976545 | -3.927577 |
| C    | -4.666000 | -1.951904 | 0.113708  | H | 0.509426 | -2.130175 | -3.401107 |
| H    | -5.482922 | -1.222419 | 0.118600  | H | 1.163397 | -3.449939 | -2.412686 |
| C    | -3.352880 | -1.525326 | -0.148596 | C | 3.279518 | -3.252571 | -0.544372 |
| C    | -3.002277 | -0.168866 | -0.443108 | H | 4.058702 | -3.842933 | -1.062385 |
| C    | -4.046378 | 0.872161  | -0.502904 | H | 2.349525 | -3.840963 | -0.562061 |
| C    | -4.009121 | 1.961767  | 0.364988  | H | 3.590251 | -3.161149 | 0.509154  |
|      |           |           |           | C | 4.754609 | -0.573993 | 0.277550  |

|    |           |           |           |   |           |           |           |
|----|-----------|-----------|-----------|---|-----------|-----------|-----------|
| H  | 4.517114  | -1.163029 | 1.179125  | C | -4.202520 | 0.373872  | -0.271058 |
| H  | 4.894504  | 0.472007  | 0.591838  | C | -4.403488 | 1.747151  | -0.153700 |
| H  | 5.732189  | -0.932761 | -0.094713 | H | -3.630116 | 2.359230  | 0.328375  |
| H  | -5.971178 | -3.583068 | 0.567325  | C | -5.549105 | 2.339110  | -0.653634 |
| C  | 0.100537  | -0.756020 | 2.268379  | H | -5.688469 | 3.422536  | -0.555253 |
| C  | 0.659833  | -1.963447 | 2.691168  | C | -6.518502 | 1.567808  | -1.276344 |
| C  | -0.879680 | -0.137570 | 3.051304  | H | -7.424680 | 2.038326  | -1.675510 |
| C  | 0.259301  | -2.531101 | 3.885227  | C | -6.335111 | 0.199241  | -1.391628 |
| H  | 1.418284  | -2.441182 | 2.056824  | H | -7.094931 | -0.418165 | -1.885433 |
| C  | -1.286989 | -0.715129 | 4.236053  | C | -5.186514 | -0.392117 | -0.892861 |
| H  | -1.316876 | 0.809746  | 2.703429  | H | -5.034768 | -1.474887 | -0.997655 |
| H  | 0.705495  | -3.473454 | 4.222969  | C | -1.727349 | 0.115624  | -0.252199 |
| H  | -2.058175 | -0.232765 | 4.847595  | C | -1.448985 | 1.055562  | -1.300069 |
| C  | 1.367567  | 1.994579  | 1.703149  | C | -2.290989 | 1.187613  | -2.411105 |
| C  | 0.857463  | 3.197818  | 2.198274  | H | -3.097930 | 0.459734  | -2.551183 |
| C  | 2.538607  | 1.498102  | 2.277016  | C | -2.109242 | 2.185920  | -3.334821 |
| C  | 1.512269  | 3.888328  | 3.200530  | H | -2.756417 | 2.249061  | -4.216088 |
| H  | -0.077374 | 3.595950  | 1.782954  | C | -1.096808 | 3.128198  | -3.124315 |
| C  | 3.190894  | 2.186073  | 3.286249  | H | -0.966769 | 3.957356  | -3.830733 |
| H  | 2.937920  | 0.542244  | 1.918045  | C | -0.246983 | 3.017050  | -2.056249 |
| H  | 1.093313  | 4.832213  | 3.569809  | H | 0.547075  | 3.760703  | -1.925950 |
| H  | 4.112235  | 1.773646  | 3.715592  | C | -0.338099 | 1.944458  | -1.135802 |
| Ir | 1.526658  | -0.355974 | -0.616223 | C | 0.518511  | 1.818497  | -0.012359 |
| C  | -0.713215 | -1.908802 | 4.654356  | C | 0.674884  | 0.579238  | 0.658902  |
| H  | -1.034098 | -2.363648 | 5.599640  | C | 1.977623  | -2.907737 | -1.730856 |
| C  | 2.686742  | 3.390369  | 3.746552  | C | 3.052844  | -2.231249 | -1.022023 |
| H  | 3.205490  | 3.942484  | 4.538988  | C | 3.193577  | -0.922191 | -1.551834 |

**TS11-Ir-a-i**

| Atom | X         | Y         | Z        |   |           |           |           |
|------|-----------|-----------|----------|---|-----------|-----------|-----------|
| O    | 0.486695  | -1.966478 | 1.401638 | C | 2.087417  | -0.712134 | -2.429099 |
| N    | -0.590100 | -0.391328 | 0.351375 | C | 1.395408  | -1.978286 | -2.589088 |
| C    | -0.637826 | -1.438973 | 1.246314 | C | 0.223069  | -2.164057 | -3.469891 |
| C    | -1.869535 | -1.820075 | 1.803013 | H | -0.514492 | -1.351066 | -3.343402 |
| C    | -1.931811 | -2.819191 | 2.788546 | H | -0.294767 | -3.116459 | -3.280375 |
| H    | -0.997079 | -3.287488 | 3.119592 | H | 0.520699  | -2.152646 | -4.534336 |
| C    | -3.135165 | -3.169828 | 3.332783 | C | 1.580624  | -4.312664 | -1.492673 |
| H    | -3.191575 | -3.939453 | 4.110382 | H | 1.520499  | -4.539882 | -0.414951 |
| C    | -4.302400 | -2.517691 | 2.901485 | H | 2.310049  | -5.020766 | -1.927096 |
| C    | -4.263730 | -1.558583 | 1.923523 | H | 0.597620  | -4.543803 | -1.930815 |
| H    | -5.192286 | -1.069118 | 1.611203 | C | 3.959863  | -2.898338 | -0.061313 |
| C    | -3.047893 | -1.191502 | 1.310250 | H | 4.521388  | -2.171761 | 0.545792  |
| C    | -2.966980 | -0.248456 | 0.246934 | H | 4.696416  | -3.534252 | -0.586039 |
|      |           |           |          | H | 3.404511  | -3.549433 | 0.633241  |
|      |           |           |          | C | 4.292321  | 0.026350  | -1.270613 |
|      |           |           |          | H | 4.713849  | -0.110076 | -0.262123 |
|      |           |           |          | H | 3.968672  | 1.074432  | -1.352829 |

|    |           |           |           |   |           |           |           |
|----|-----------|-----------|-----------|---|-----------|-----------|-----------|
| H  | 5.121926  | -0.111659 | -1.989500 | C | 4.062559  | -0.558220 | -0.273485 |
| C  | 1.867995  | 0.466291  | -3.296703 | C | 4.255934  | -1.533086 | 0.701767  |
| H  | 2.187127  | 1.403369  | -2.815068 | C | 5.329154  | -2.402726 | 0.634329  |
| H  | 0.805764  | 0.588036  | -3.564581 | C | 6.238592  | -2.307474 | -0.407585 |
| H  | 2.436801  | 0.369918  | -4.240547 | C | 6.065947  | -1.334878 | -1.378370 |
| H  | -5.265887 | -2.782571 | 3.353636  | C | 4.988311  | -0.468850 | -1.312213 |
| Ir | 1.277710  | -1.124780 | -0.435329 | C | 1.251286  | -1.503276 | -0.396801 |
| C  | 1.062764  | 0.607239  | 2.097046  | C | 0.137725  | -1.990859 | 0.316209  |
| C  | 2.396369  | 0.491665  | 2.468528  | C | 1.867273  | -2.303665 | -1.358028 |
| C  | 0.101618  | 0.788688  | 3.085654  | C | 1.429912  | -3.588901 | -1.603241 |
| C  | 2.765975  | 0.580515  | 3.798543  | C | 0.354936  | -4.090523 | -0.875226 |
| H  | 3.151498  | 0.337930  | 1.684113  | C | -0.277897 | -3.310146 | 0.066414  |
| C  | 0.465293  | 0.837425  | 4.421436  | C | -0.424743 | 0.278360  | 1.375668  |
| H  | -0.953485 | 0.906592  | 2.795180  | C | -0.584588 | -1.154724 | 1.252629  |
| C  | 1.799685  | 0.741841  | 4.779922  | H | 3.563452  | 5.651884  | 0.101602  |
| H  | 3.824320  | 0.508191  | 4.076723  | H | 5.296121  | 1.723731  | -0.058438 |
| H  | -0.304892 | 0.964474  | 5.192102  | H | 1.278601  | 4.635003  | 0.079349  |
| H  | 2.090311  | 0.789538  | 5.836201  | H | 3.533282  | -1.611276 | 1.525545  |
| C  | 1.331020  | 2.968729  | 0.447336  | H | 5.460909  | -3.165572 | 1.411275  |
| C  | 2.457012  | 3.361623  | -0.277061 | H | 7.090041  | -2.995861 | -0.461752 |
| C  | 1.023278  | 3.690217  | 1.601381  | H | 6.778257  | -1.253585 | -2.208207 |
| C  | 3.248319  | 4.422260  | 0.130135  | H | 4.846395  | 0.290348  | -2.093228 |
| H  | 2.709881  | 2.820472  | -1.197856 | H | 2.696251  | -1.893292 | -1.944748 |
| C  | 1.820901  | 4.741997  | 2.020245  | H | 1.916879  | -4.199009 | -2.371166 |
| H  | 0.136882  | 3.414281  | 2.185483  | H | -0.001695 | -5.111925 | -1.058226 |
| C  | 2.937139  | 5.113564  | 1.288454  | H | -1.145777 | -3.706621 | 0.604375  |
| H  | 4.125710  | 4.706275  | -0.464126 | C | -3.342621 | 1.475540  | -0.893383 |
| H  | 1.558888  | 5.286539  | 2.935687  | C | -3.845467 | 0.235016  | -0.397319 |
| H  | 3.565287  | 5.947638  | 1.622552  | C | -3.386127 | -0.818491 | -1.276804 |

**TS11-Ir-b**

| Atom | X         | Y         | Z         |   |           |           |           |
|------|-----------|-----------|-----------|---|-----------|-----------|-----------|
| C    | 3.435814  | 4.565119  | 0.046741  | C | -2.551858 | -0.243987 | -2.248160 |
| C    | 4.548031  | 3.725944  | 0.019575  | C | -1.690450 | 2.146046  | -2.755417 |
| C    | 4.404298  | 2.359127  | -0.051207 | H | -2.243583 | 2.484758  | -3.650182 |
| C    | 3.129780  | 1.772502  | -0.100033 | H | -1.442779 | 3.033376  | -2.153957 |
| C    | 2.015939  | 2.627259  | -0.034538 | H | -0.740564 | 1.710824  | -3.107195 |
| C    | 2.177517  | 4.010424  | 0.027041  | C | -4.905545 | 0.115408  | 0.632673  |
| C    | 2.907330  | 0.357425  | -0.194133 | H | -4.669728 | 0.691516  | 1.543458  |
| C    | 1.625680  | -0.123320 | -0.167568 | H | -5.867247 | 0.501036  | 0.246172  |
| N    | 0.522289  | 0.705036  | 0.091969  | H | -5.081147 | -0.927493 | 0.937388  |
| C    | 0.669512  | 2.096946  | 0.068925  | C | -3.677024 | 2.821953  | -0.383451 |
| O    | -0.300475 | 2.808995  | 0.199070  | H | -2.816387 | 3.507191  | -0.439706 |
|      |           |           |           | H | -4.502663 | 3.281857  | -0.958989 |
|      |           |           |           | H | -4.000479 | 2.787573  | 0.669701  |
|      |           |           |           | C | -3.742419 | -2.252347 | -1.183893 |

|                    |           |           |           |   |           |           |           |
|--------------------|-----------|-----------|-----------|---|-----------|-----------|-----------|
| H                  | -2.893596 | -2.903810 | -1.454106 | C | 4.305578  | -0.045301 | -0.372423 |
| H                  | -4.062411 | -2.535834 | -0.169502 | C | 4.769533  | -1.023460 | 0.504132  |
| H                  | -4.573786 | -2.501126 | -1.868462 | H | 4.135715  | -1.322967 | 1.349480  |
| C                  | -1.807793 | -0.959333 | -3.310542 | C | 6.001607  | -1.621628 | 0.311488  |
| H                  | -1.580355 | -1.999972 | -3.021033 | H | 6.348386  | -2.391204 | 1.011767  |
| H                  | -2.370154 | -0.999846 | -4.262041 | C | 6.798229  | -1.248235 | -0.759802 |
| H                  | -0.843228 | -0.471649 | -3.528770 | H | 7.774515  | -1.723398 | -0.913596 |
| H                  | 5.556076  | 4.157016  | 0.058742  | C | 6.354852  | -0.267851 | -1.632642 |
| N                  | -1.182546 | -1.728797 | 2.409984  | H | 6.978232  | 0.034377  | -2.483078 |
| N                  | -0.253015 | 1.017707  | 2.496064  | C | 5.120331  | 0.327485  | -1.440100 |
| C                  | -0.378228 | -2.679348 | 3.111475  | H | 4.763924  | 1.094748  | -2.140250 |
| H                  | -0.447523 | -3.719950 | 2.718677  | C | 1.819019  | -0.173204 | -0.196043 |
| H                  | 0.683472  | -2.381168 | 3.078781  | C | 1.661072  | -1.571029 | -0.492329 |
| H                  | -0.689823 | -2.711759 | 4.173234  | C | 2.478386  | -2.271235 | -1.385724 |
| C                  | -2.555875 | -2.101189 | 2.384232  | H | 3.300272  | -1.744672 | -1.882304 |
| H                  | -2.757659 | -3.086966 | 1.896117  | C | 2.240614  | -3.589179 | -1.700999 |
| H                  | -2.940271 | -2.171416 | 3.420050  | H | 2.878274  | -4.100850 | -2.429470 |
| H                  | -3.132321 | -1.332261 | 1.853731  | C | 1.160207  | -4.254870 | -1.114086 |
| C                  | -1.345073 | 1.803122  | 2.970567  | H | 0.950061  | -5.298988 | -1.377921 |
| H                  | -2.058435 | 1.195235  | 3.574016  | C | 0.347195  | -3.601589 | -0.226307 |
| H                  | -0.969822 | 2.622215  | 3.610856  | H | -0.506438 | -4.122910 | 0.225424  |
| H                  | -1.882738 | 2.243024  | 2.116515  | C | 0.551772  | -2.242946 | 0.110521  |
| C                  | 0.619733  | 0.521318  | 3.511599  | C | -0.226623 | -1.626670 | 1.124486  |
| H                  | 1.425130  | -0.073234 | 3.046596  | C | -0.440526 | -0.213915 | 1.202660  |
| H                  | 1.087541  | 1.364607  | 4.052691  | C | -2.854898 | -0.686854 | -1.905211 |
| H                  | 0.095328  | -0.115705 | 4.256591  | C | -3.090823 | 0.693941  | -2.127834 |
| Ir                 | -1.635160 | 0.122501  | -0.181950 | C | -3.726671 | 1.196071  | -0.950434 |
|                    |           |           |           | C | -4.002491 | 0.102869  | -0.059734 |
|                    |           |           |           | C | -3.421648 | -1.061322 | -0.636868 |
|                    |           |           |           | C | -3.555063 | -2.461020 | -0.170275 |
|                    |           |           |           | H | -3.981820 | -2.520452 | 0.841925  |
|                    |           |           |           | H | -2.588798 | -2.990893 | -0.151169 |
|                    |           |           |           | H | -4.224474 | -3.032008 | -0.839765 |
|                    |           |           |           | C | -2.168472 | -1.628768 | -2.816034 |
|                    |           |           |           | H | -1.549809 | -2.353279 | -2.258062 |
|                    |           |           |           | H | -1.508179 | -1.108693 | -3.527108 |
|                    |           |           |           | H | -2.896849 | -2.213306 | -3.407952 |
|                    |           |           |           | C | -2.715192 | 1.479740  | -3.325113 |
|                    |           |           |           | H | -2.436541 | 2.514938  | -3.069262 |
|                    |           |           |           | H | -3.545513 | 1.541134  | -4.052733 |
|                    |           |           |           | H | -1.855561 | 1.035498  | -3.852155 |
|                    |           |           |           | C | -4.144224 | 2.597645  | -0.726038 |
|                    |           |           |           | H | -5.179255 | 2.764198  | -1.075664 |
|                    |           |           |           | H | -3.497821 | 3.308478  | -1.263654 |
| <b>TS11-Ir-b-i</b> |           |           |           |   |           |           |           |
| Atom               | X         | Y         | Z         |   |           |           |           |
| O                  | -0.710024 | 2.165772  | 0.119999  |   |           |           |           |
| N                  | 0.610399  | 0.425192  | 0.094629  |   |           |           |           |
| C                  | 0.488332  | 1.775926  | 0.141584  |   |           |           |           |
| C                  | 1.627732  | 2.593093  | 0.216034  |   |           |           |           |
| C                  | 1.513221  | 3.981500  | 0.409875  |   |           |           |           |
| H                  | 0.510278  | 4.418813  | 0.486548  |   |           |           |           |
| C                  | 2.633255  | 4.755167  | 0.521679  |   |           |           |           |
| H                  | 2.547940  | 5.835625  | 0.682830  |   |           |           |           |
| C                  | 3.901946  | 4.152239  | 0.449023  |   |           |           |           |
| C                  | 4.035255  | 2.805666  | 0.240374  |   |           |           |           |
| H                  | 5.036435  | 2.362888  | 0.193951  |   |           |           |           |
| C                  | 2.904342  | 1.973473  | 0.090712  |   |           |           |           |
| C                  | 2.985193  | 0.581360  | -0.171894 |   |           |           |           |

|                  |           |           |           |   |           |           |           |
|------------------|-----------|-----------|-----------|---|-----------|-----------|-----------|
| H                | -4.110636 | 2.863489  | 0.342849  | H | 3.499122  | -1.506658 | 1.646476  |
| C                | -4.835499 | 0.185528  | 1.159510  | C | 5.334108  | -2.267406 | 0.810591  |
| H                | -4.670233 | 1.126267  | 1.709414  | H | 5.464568  | -3.014472 | 1.603040  |
| H                | -4.635795 | -0.641994 | 1.858271  | C | 6.267991  | -2.166952 | -0.208822 |
| H                | -5.913172 | 0.145485  | 0.910754  | H | 7.137510  | -2.834488 | -0.229285 |
| H                | 4.800539  | 4.770553  | 0.562272  | C | 6.096120  | -1.214678 | -1.199640 |
| N                | -0.352553 | 0.335272  | 2.462166  | H | 6.827320  | -1.128304 | -2.012560 |
| N                | -0.852328 | -2.452412 | 2.044735  | C | 4.995146  | -0.377130 | -1.174982 |
| C                | -1.113251 | 1.460173  | 2.876917  | H | 4.853794  | 0.365425  | -1.971954 |
| H                | -1.418887 | 1.334324  | 3.935545  | C | 1.586746  | -0.062910 | -0.170687 |
| H                | -0.550804 | 2.418261  | 2.806004  | C | 1.255770  | -1.473000 | -0.299294 |
| H                | -2.018821 | 1.540466  | 2.253827  | C | 1.902185  | -2.295614 | -1.216769 |
| C                | 0.868540  | 0.167523  | 3.178429  | H | 2.691907  | -1.865154 | -1.842754 |
| H                | 1.413630  | -0.714017 | 2.797194  | C | 1.553697  | -3.622805 | -1.370182 |
| H                | 1.537172  | 1.055065  | 3.082309  | H | 2.067314  | -4.247891 | -2.107684 |
| H                | 0.676809  | 0.014883  | 4.259431  | C | 0.537375  | -4.142315 | -0.579746 |
| C                | -1.939563 | -1.952626 | 2.818446  | H | 0.249424  | -5.196620 | -0.675260 |
| H                | -2.501398 | -1.199251 | 2.247877  | C | -0.124247 | -3.343652 | 0.328407  |
| H                | -2.616054 | -2.792476 | 3.073475  | H | -0.933335 | -3.783755 | 0.921630  |
| H                | -1.616141 | -1.481160 | 3.773108  | C | 0.194527  | -1.981885 | 0.483057  |
| C                | -0.047862 | -3.359101 | 2.809306  | C | -0.554114 | -1.171855 | 1.430133  |
| H                | 0.821193  | -3.705023 | 2.231072  | C | -0.617390 | 0.241611  | 1.550013  |
| H                | 0.323117  | -2.885951 | 3.747536  | C | -2.690271 | -0.457374 | -2.061113 |
| H                | -0.646249 | -4.243063 | 3.098917  | C | -2.725897 | 0.961772  | -1.829265 |
| Ir               | -1.794625 | 0.407181  | -0.281300 | C | -3.510976 | 1.224883  | -0.674193 |
|                  |           |           |           | C | -3.837214 | -0.040621 | -0.099389 |
|                  |           |           |           | C | -3.367496 | -1.072327 | -0.995188 |
|                  |           |           |           | C | -3.557426 | -2.527191 | -0.801777 |
|                  |           |           |           | H | -3.665644 | -2.789976 | 0.263818  |
|                  |           |           |           | H | -2.709885 | -3.110438 | -1.199489 |
|                  |           |           |           | H | -4.469041 | -2.882560 | -1.315497 |
|                  |           |           |           | C | -1.992436 | -1.146913 | -3.171553 |
|                  |           |           |           | H | -1.141577 | -0.555264 | -3.545865 |
|                  |           |           |           | H | -2.659088 | -1.334249 | -4.033672 |
|                  |           |           |           | H | -1.587834 | -2.124385 | -2.854706 |
|                  |           |           |           | C | -2.167933 | 1.986347  | -2.741595 |
|                  |           |           |           | H | -1.227334 | 1.654118  | -3.209062 |
|                  |           |           |           | H | -1.958182 | 2.929337  | -2.215709 |
|                  |           |           |           | H | -2.875982 | 2.206904  | -3.561113 |
|                  |           |           |           | C | -3.928397 | 2.555656  | -0.182796 |
|                  |           |           |           | H | -4.833889 | 2.913012  | -0.708674 |
|                  |           |           |           | H | -3.143030 | 3.313249  | -0.334285 |
|                  |           |           |           | H | -4.166229 | 2.540035  | 0.892957  |
|                  |           |           |           | C | -4.702844 | -0.265046 | 1.082162  |
| <b>TS11-Ir-c</b> |           |           |           |   |           |           |           |
| Atom             | X         | Y         | Z         |   |           |           |           |
| O                | -0.406127 | 2.816148  | 0.033457  |   |           |           |           |
| N                | 0.475072  | 0.740898  | -0.062664 |   |           |           |           |
| C                | 0.588943  | 2.114436  | -0.043487 |   |           |           |           |
| C                | 1.927659  | 2.676493  | -0.067794 |   |           |           |           |
| C                | 2.062101  | 4.064022  | -0.003376 |   |           |           |           |
| H                | 1.149430  | 4.670737  | 0.001828  |   |           |           |           |
| C                | 3.306088  | 4.642838  | 0.070125  |   |           |           |           |
| H                | 3.410612  | 5.732358  | 0.123145  |   |           |           |           |
| C                | 4.436374  | 3.825242  | 0.095080  |   |           |           |           |
| C                | 4.322676  | 2.457446  | 0.024956  |   |           |           |           |
| H                | 5.225822  | 1.839371  | 0.064463  |   |           |           |           |
| C                | 3.061900  | 1.843162  | -0.077575 |   |           |           |           |
| C                | 2.872362  | 0.425945  | -0.145688 |   |           |           |           |
| C                | 4.045347  | -0.469343 | -0.157731 |   |           |           |           |
| C                | 4.238596  | -1.423086 | 0.838661  |   |           |           |           |



|    |           |           |           |   |           |           |           |
|----|-----------|-----------|-----------|---|-----------|-----------|-----------|
| H  | -4.646442 | 0.575576  | 1.791851  | H | 6.548049  | -0.035485 | -2.766759 |
| H  | -4.420941 | -1.176862 | 1.633882  | C | 4.763022  | 0.318933  | -1.619680 |
| H  | -5.764004 | -0.376912 | 0.791301  | H | 4.394372  | 1.099505  | -2.298544 |
| H  | 5.432853  | 4.277336  | 0.176728  | C | 1.540271  | -0.106033 | -0.164581 |
| Ir | -1.640829 | 0.040096  | -0.070037 | C | 1.368498  | -1.507345 | -0.409153 |
| C  | -1.267916 | -1.860958 | 2.569832  | C | 2.079517  | -2.198169 | -1.396051 |
| H  | -2.022773 | -2.561142 | 2.158705  | H | 2.743585  | -1.636024 | -2.062336 |
| H  | -1.873943 | -1.110900 | 3.117137  | C | 1.927555  | -3.552052 | -1.576211 |
| C  | -0.463823 | 1.126100  | 2.722652  | H | 2.468336  | -4.064470 | -2.379368 |
| H  | -0.185902 | 0.520367  | 3.609718  | C | 1.059857  | -4.260499 | -0.739269 |
| H  | 0.421866  | 1.766767  | 2.529898  | H | 0.926437  | -5.340746 | -0.878090 |
| C  | -1.672397 | 1.992204  | 2.989067  | C | 0.357406  | -3.611476 | 0.241177  |
| H  | -2.555282 | 1.378563  | 3.241955  | H | -0.339547 | -4.184900 | 0.865055  |
| H  | -1.489416 | 2.678457  | 3.831009  | C | 0.456314  | -2.213591 | 0.437300  |
| H  | -1.918001 | 2.587615  | 2.095741  | C | -0.195980 | -1.559071 | 1.515624  |
| C  | -0.343556 | -2.569881 | 3.531280  | C | -0.494276 | -0.175301 | 1.460852  |
| H  | -0.905271 | -3.051222 | 4.347540  | C | -2.880797 | 0.081684  | -2.139029 |
| H  | 0.251575  | -3.348623 | 3.028889  | C | -3.593274 | 0.984873  | -1.342343 |
| H  | 0.369036  | -1.863513 | 3.989464  | C | -3.975904 | 0.319924  | -0.109941 |

#### TS11-Ir-c-i

| Atom | X         | Y         | Z         | Atom | X         | Y         | Z         |
|------|-----------|-----------|-----------|------|-----------|-----------|-----------|
| O    | -0.912911 | 2.259920  | 0.417991  | H    | -1.952925 | -3.129448 | -1.141164 |
| N    | 0.370646  | 0.506798  | 0.267582  | H    | -1.121905 | -2.151262 | -2.361123 |
| C    | 0.282551  | 1.878291  | 0.348926  | H    | -2.736971 | -2.807471 | -2.706280 |
| C    | 1.438550  | 2.667304  | 0.322916  | C    | -2.281273 | 0.310895  | -3.471232 |
| C    | 1.367439  | 4.058110  | 0.523290  | H    | -1.234640 | -0.037168 | -3.516049 |
| H    | 0.383979  | 4.514900  | 0.687979  | H    | -2.283783 | 1.376487  | -3.747767 |
| C    | 2.508778  | 4.806972  | 0.539072  | H    | -2.829947 | -0.233097 | -4.262485 |
| H    | 2.461702  | 5.888350  | 0.707852  | C    | -3.931572 | 2.389937  | -1.660511 |
| C    | 3.752004  | 4.175811  | 0.359456  | H    | -3.784892 | 3.049786  | -0.789391 |
| C    | 3.839761  | 2.827585  | 0.132818  | H    | -4.991534 | 2.484153  | -1.958089 |
| H    | 4.823837  | 2.365266  | -0.003015 | H    | -3.318521 | 2.788731  | -2.482621 |
| C    | 2.684235  | 2.021593  | 0.071584  | C    | -4.887053 | 0.878337  | 0.914187  |
| C    | 2.712331  | 0.630783  | -0.219553 | H    | -5.947567 | 0.740202  | 0.629095  |
| C    | 4.000438  | -0.030512 | -0.507878 | H    | -4.730925 | 1.959199  | 1.059288  |
| C    | 4.478430  | -1.027764 | 0.339476  | H    | -4.745686 | 0.392211  | 1.892980  |
| H    | 3.880749  | -1.308723 | 1.217148  | C    | -3.764863 | -2.086448 | 0.813002  |
| C    | 5.676019  | -1.666858 | 0.076593  | H    | -3.700539 | -1.708025 | 1.846764  |
| H    | 6.034508  | -2.451102 | 0.754071  | H    | -3.042459 | -2.912572 | 0.721215  |
| C    | 6.422374  | -1.316194 | -1.037513 | H    | -4.773905 | -2.519667 | 0.683990  |
| H    | 7.371148  | -1.823630 | -1.248154 | H    | 4.670484  | 4.774018  | 0.399570  |
| C    | 5.963901  | -0.318675 | -1.882538 | C    | -0.592504 | -2.375868 | 2.710133  |
|      |           |           |           | H    | -1.122580 | -1.745180 | 3.444097  |

|    |           |           |           |   |           |          |           |
|----|-----------|-----------|-----------|---|-----------|----------|-----------|
| H  | -1.352483 | -3.128698 | 2.406341  | H | -4.152213 | 0.490212 | -1.873116 |
| C  | -0.533476 | 0.636745  | 2.732735  | C | -0.627226 | 1.069193 | 0.167438  |
| H  | -0.839833 | 1.670355  | 2.509645  | C | -1.396220 | 2.052159 | -0.612897 |
| H  | -1.360767 | 0.239117  | 3.350228  | C | -0.786453 | 2.665487 | -1.715983 |
| C  | 0.535991  | -3.109726 | 3.409170  | H | 0.255127  | 2.418923 | -1.962347 |
| H  | 1.303083  | -2.416217 | 3.790943  | C | -1.460959 | 3.578785 | -2.501038 |
| H  | 0.156196  | -3.690822 | 4.266526  | H | -0.942439 | 4.043485 | -3.348773 |
| H  | 1.049981  | -3.813859 | 2.735748  | C | -2.775762 | 3.916935 | -2.216580 |
| C  | 0.762239  | 0.646093  | 3.513934  | H | -3.307982 | 4.653480 | -2.828742 |
| H  | 1.010963  | -0.339438 | 3.935421  | C | -3.402839 | 3.297895 | -1.151017 |
| H  | 1.609648  | 0.948014  | 2.872207  | H | -4.447692 | 3.535115 | -0.914267 |
| H  | 0.717589  | 1.359963  | 4.351914  | C | -2.732277 | 2.374462 | -0.366239 |
| Ir | -1.799314 | 0.392526  | -0.104224 | H | -3.280030 | 1.896517 | 0.450057  |

### 12-Rh-a

| Atom | X         | Y         | Z         |   |           |           |           |
|------|-----------|-----------|-----------|---|-----------|-----------|-----------|
| Rh   | -1.047138 | -0.929724 | -0.482786 | C | -2.237389 | 0.578361  | 2.166178  |
| O    | 0.465647  | 3.483985  | 0.772856  | C | -2.296738 | 1.808073  | 2.821253  |
| N    | 0.790805  | 1.322756  | 0.183252  | H | -1.506489 | 2.548877  | 2.636321  |
| C    | 0.320474  | -3.279946 | -2.390569 | C | -3.351263 | 2.099047  | 3.668437  |
| H    | 0.142012  | -3.924727 | -3.270830 | H | -3.388699 | 3.072030  | 4.172669  |
| H    | 0.622370  | -3.941797 | -1.564063 | C | -4.358955 | 1.169797  | 3.876543  |
| H    | 1.181245  | -2.634106 | -2.631571 | H | -5.196905 | 1.405760  | 4.543050  |
| C    | -0.893449 | -2.498590 | -2.064719 | C | -4.303467 | -0.059067 | 3.237822  |
| C    | -1.931661 | -2.912237 | -1.164579 | H | -5.096293 | -0.800125 | 3.397702  |
| C    | -2.966388 | -1.954510 | -1.228730 | C | -3.249173 | -0.350895 | 2.389869  |
| C    | -2.558808 | -0.930235 | -2.133615 | H | -3.202330 | -1.317601 | 1.871372  |
| C    | -1.285123 | -1.284730 | -2.676683 | C | -0.231201 | -0.827387 | 1.533090  |
| C    | -0.573791 | -0.567593 | -3.758503 | C | -0.430765 | -1.812812 | 2.541823  |
| H    | -0.917396 | -0.898237 | -4.757086 | H | -1.147096 | -1.610199 | 3.347968  |
| H    | 0.514128  | -0.737034 | -3.719471 | C | 0.253206  | -2.987513 | 2.499508  |
| H    | -0.739045 | 0.521357  | -3.709776 | H | 0.089680  | -3.744098 | 3.279004  |
| C    | -1.938736 | -4.156669 | -0.363030 | C | 1.158443  | -3.254079 | 1.445895  |
| H    | -2.501363 | -4.037357 | 0.578236  | H | 1.642414  | -4.237192 | 1.378071  |
| H    | -0.920444 | -4.474943 | -0.089542 | C | 1.477905  | -2.283037 | 0.550053  |
| H    | -2.404830 | -4.994423 | -0.914616 | H | 2.228717  | -2.486366 | -0.220842 |
| C    | -4.288241 | -2.029044 | -0.568019 | C | 0.870221  | -0.990001 | 0.590459  |
| H    | -5.066338 | -2.360252 | -1.280957 | C | 1.613728  | 0.227437  | 0.240698  |
| H    | -4.617864 | -1.054380 | -0.169472 | C | 2.970528  | 0.376270  | 0.139975  |
| H    | -4.293888 | -2.746138 | 0.267840  | C | 3.926423  | -0.742365 | 0.282826  |
| C    | -3.415753 | 0.166900  | -2.624075 | C | 4.238832  | -1.247306 | 1.541627  |
| H    | -3.980239 | -0.164499 | -3.516271 | H | 3.744116  | -0.820381 | 2.423737  |
| H    | -2.833311 | 1.054146  | -2.916345 | C | 5.134117  | -2.293887 | 1.680503  |
|      |           |           |           | H | 5.359197  | -2.689381 | 2.678282  |
|      |           |           |           | C | 5.745276  | -2.839913 | 0.563104  |
|      |           |           |           | H | 6.454142  | -3.669134 | 0.672323  |

|   |          |           |           |   |           |           |           |
|---|----------|-----------|-----------|---|-----------|-----------|-----------|
| C | 5.462431 | -2.327584 | -0.693667 | H | -3.904277 | 1.218555  | -3.421416 |
| H | 5.947490 | -2.750423 | -1.581580 | H | -2.147845 | 1.419834  | -3.599536 |
| C | 4.561275 | -1.284885 | -0.831380 | H | -2.994089 | 2.132774  | -2.204205 |
| H | 4.328256 | -0.882727 | -1.826372 | C | -0.586152 | 1.567540  | 0.248458  |
| C | 3.502898 | 1.703407  | 0.008290  | C | -1.228545 | 0.995409  | 1.397478  |
| C | 4.867774 | 1.962681  | -0.197503 | C | -0.643444 | -0.269197 | 1.745716  |
| H | 5.567725 | 1.127104  | -0.307265 | C | -1.042235 | -1.077701 | 2.849856  |
| C | 5.336073 | 3.254707  | -0.255884 | H | -1.603258 | -0.621182 | 3.672032  |
| C | 4.474176 | 4.339554  | -0.095256 | C | -0.713697 | -2.396959 | 2.895046  |
| H | 4.861393 | 5.363433  | -0.142383 | H | -1.023934 | -3.009525 | 3.752395  |
| C | 3.138552 | 4.109728  | 0.136698  | C | 0.017067  | -2.987662 | 1.839280  |
| H | 2.431817 | 4.934552  | 0.285956  | H | 0.198233  | -4.070104 | 1.839947  |
| C | 2.647265 | 2.806451  | 0.183737  | C | 0.545354  | -2.219499 | 0.848814  |
| C | 1.232081 | 2.605318  | 0.439320  | H | 1.148078  | -2.697116 | 0.070252  |
| H | 6.405796 | 3.430949  | -0.423187 | C | 0.326099  | -0.808499 | 0.785731  |

### 12-Rh-b

| Atom | X         | Y         | Z         |   |           |           |           |
|------|-----------|-----------|-----------|---|-----------|-----------|-----------|
| Rh   | -1.526343 | -0.320154 | -0.239502 | C | 1.338513  | 0.120626  | 0.272817  |
| O    | 1.203011  | 3.582424  | 0.713284  | C | 2.657238  | -0.119305 | 0.002591  |
| N    | 0.853076  | 1.404985  | 0.224584  | C | 3.271872  | -1.463177 | 0.063562  |
| C    | -1.519105 | -3.434219 | -1.414870 | C | 3.748715  | -1.971053 | 1.266989  |
| H    | -2.075295 | -4.148975 | -2.049485 | H | 3.642466  | -1.370443 | 2.179494  |
| H    | -1.491462 | -3.857829 | -0.397747 | C | 4.328779  | -3.227346 | 1.323378  |
| H    | -0.482651 | -3.405773 | -1.788918 | H | 4.686552  | -3.619939 | 2.283023  |
| C    | -2.158826 | -2.100575 | -1.444202 | C | 4.457307  | -3.986431 | 0.170923  |
| C    | -3.299865 | -1.725991 | -0.675340 | H | 4.915876  | -4.981464 | 0.214975  |
| C    | -3.652465 | -0.413849 | -1.057997 | C | 4.010366  | -3.479625 | -1.038912 |
| C    | -2.760291 | 0.001418  | -2.099690 | H | 4.116231  | -4.071915 | -1.955818 |
| C    | -1.840888 | -1.045233 | -2.349818 | C | 3.424900  | -2.225299 | -1.092330 |
| C    | -0.801527 | -1.091061 | -3.405071 | H | 3.062658  | -1.823713 | -2.048770 |
| H    | -1.149550 | -1.626734 | -4.308927 | C | 3.515423  | 0.998492  | -0.267593 |
| H    | 0.111787  | -1.607052 | -3.061726 | C | 4.860166  | 0.854625  | -0.645823 |
| H    | -0.497368 | -0.081031 | -3.723727 | H | 5.275959  | -0.148515 | -0.795982 |
| C    | -3.942957 | -2.582537 | 0.347552  | C | 5.661190  | 1.959758  | -0.823207 |
| H    | -4.668952 | -2.022092 | 0.957756  | C | 5.164114  | 3.247062  | -0.622821 |
| H    | -3.205110 | -3.023692 | 1.043424  | H | 5.813628  | 4.117277  | -0.768134 |
| H    | -4.490508 | -3.428642 | -0.108104 | C | 3.854811  | 3.411055  | -0.232988 |
| C    | -4.795320 | 0.408304  | -0.596288 | H | 3.429553  | 4.405645  | -0.052841 |
| H    | -5.553279 | 0.524406  | -1.393536 | C | 3.029870  | 2.302132  | -0.059572 |
| H    | -4.476202 | 1.428215  | -0.311837 | C | 1.654454  | 2.513227  | 0.353325  |
| H    | -5.305124 | -0.032011 | 0.274043  | H | 6.707556  | 1.822363  | -1.122379 |
| C    | -2.948997 | 1.249864  | -2.865167 | N | -1.068303 | 2.614661  | -0.525600 |
|      |           |           |           | N | -2.260364 | 1.646204  | 2.077716  |
|      |           |           |           | C | -3.390044 | 0.904921  | 2.543299  |
|      |           |           |           | H | -3.557760 | 0.027628  | 1.897426  |
|      |           |           |           | H | -3.297649 | 0.552165  | 3.593884  |

|   |           |          |           |   |           |           |           |
|---|-----------|----------|-----------|---|-----------|-----------|-----------|
| H | -4.292643 | 1.545004 | 2.499680  | C | 0.602046  | -1.341511 | 1.000584  |
| C | -1.789457 | 2.596662 | 3.042091  | C | 0.988101  | -0.248428 | 1.870780  |
| H | -1.469716 | 2.115054 | 3.995855  | C | 0.531015  | 1.032611  | 1.459185  |
| H | -0.928329 | 3.154519 | 2.635619  | C | 0.916683  | 2.295652  | 1.991525  |
| H | -2.591563 | 3.319793 | 3.281692  | H | 1.465834  | 2.342912  | 2.941487  |
| C | -0.357629 | 2.829474 | -1.744683 | C | 0.615230  | 3.435220  | 1.308243  |
| H | -1.009415 | 3.380811 | -2.444936 | H | 0.926286  | 4.409606  | 1.709099  |
| H | 0.573859  | 3.425026 | -1.632468 | C | -0.074137 | 3.381325  | 0.073918  |
| H | -0.099258 | 1.859793 | -2.208467 | H | -0.247280 | 4.305724  | -0.491443 |
| C | -1.646403 | 3.811158 | 0.013217  | C | -0.580080 | 2.201143  | -0.379692 |
| H | -2.413449 | 3.569564 | 0.759834  | H | -1.199010 | 2.173739  | -1.286187 |
| H | -0.902992 | 4.501349 | 0.458188  | C | -0.352144 | 0.986095  | 0.324171  |
| H | -2.150605 | 4.335529 | -0.818641 | C | -1.317973 | -0.116964 | 0.278179  |

### 12-Rh-c

| Atom | X         | Y         | Z         |   |           |           |           |
|------|-----------|-----------|-----------|---|-----------|-----------|-----------|
| O    | -0.753876 | -3.525576 | -0.228916 | C | -2.656743 | 0.037640  | 0.049789  |
| N    | -0.756649 | -1.360473 | 0.486384  | C | -3.295468 | 1.366804  | 0.076222  |
| C    | 1.056031  | 0.899550  | -3.281733 | C | -3.200879 | 2.160443  | 1.217568  |
| H    | 1.501416  | 1.082276  | -4.277310 | H | -2.632493 | 1.784811  | 2.079607  |
| H    | 0.579245  | 1.842248  | -2.967498 | C | -3.792344 | 3.410143  | 1.266090  |
| H    | 0.254457  | 0.155039  | -3.414565 | H | -3.701609 | 4.020528  | 2.172557  |
| C    | 2.077744  | 0.446779  | -2.310318 | C | -4.502772 | 3.885718  | 0.175351  |
| C    | 2.954404  | 1.313922  | -1.565216 | H | -4.974881 | 4.874579  | 0.212001  |
| C    | 3.838609  | 0.513041  | -0.821944 | C | -4.618043 | 3.100324  | -0.961622 |
| C    | 3.466595  | -0.849400 | -1.030411 | H | -5.178647 | 3.468966  | -1.829141 |
| C    | 2.412105  | -0.886991 | -2.006319 | C | -4.023286 | 1.851943  | -1.009483 |
| C    | 1.835687  | -2.112736 | -2.607366 | H | -4.106481 | 1.237506  | -1.915948 |
| H    | 2.506683  | -2.542377 | -3.375175 | C | -3.453068 | -1.138466 | -0.147956 |
| H    | 0.870727  | -1.912424 | -3.099450 | C | -4.848282 | -1.121713 | -0.290431 |
| H    | 1.654954  | -2.904240 | -1.860852 | H | -5.393262 | -0.176701 | -0.192622 |
| C    | 2.990214  | 2.792398  | -1.638026 | C | -5.541247 | -2.282939 | -0.545952 |
| H    | 3.150921  | 3.251696  | -0.646378 | C | -4.874055 | -3.499382 | -0.673541 |
| H    | 2.053600  | 3.210416  | -2.038029 | H | -5.434888 | -4.417868 | -0.880013 |
| H    | 3.811056  | 3.145429  | -2.290109 | C | -3.506948 | -3.539628 | -0.521723 |
| C    | 4.973539  | 1.014066  | -0.015141 | H | -2.951523 | -4.481147 | -0.597843 |
| H    | 5.822652  | 1.308549  | -0.660865 | C | -2.794672 | -2.375499 | -0.240760 |
| H    | 5.353916  | 0.257939  | 0.689220  | C | -1.359654 | -2.494103 | -0.018236 |
| H    | 4.705013  | 1.907956  | 0.574652  | H | -6.632854 | -2.246840 | -0.647140 |
| C    | 4.208188  | -2.037117 | -0.549658 | C | 1.826605  | -0.375446 | 3.114446  |
| H    | 5.053035  | -2.272777 | -1.223910 | H | 1.739789  | -1.388316 | 3.539590  |
| H    | 3.569622  | -2.933553 | -0.513624 | H | 1.377333  | 0.289880  | 3.879558  |
| H    | 4.633392  | -1.891631 | 0.456997  | C | 1.224841  | -2.666305 | 1.360364  |
|      |           |           |           | H | 2.242306  | -2.427208 | 1.723421  |
|      |           |           |           | H | 1.370491  | -3.296865 | 0.471488  |
|      |           |           |           | C | 0.490506  | -3.454604 | 2.426748  |
|      |           |           |           | H | 1.112430  | -4.292259 | 2.781374  |

|    |           |           |           |   |           |          |           |
|----|-----------|-----------|-----------|---|-----------|----------|-----------|
| H  | 0.240286  | -2.835892 | 3.304682  | C | -2.710468 | 3.901665 | -2.328331 |
| H  | -0.445778 | -3.885265 | 2.047044  | H | -3.262887 | 4.605257 | -2.961201 |
| C  | 3.287924  | -0.029298 | 2.958316  | C | -3.270273 | 3.408744 | -1.164136 |
| H  | 3.427417  | 0.971582  | 2.517876  | H | -4.280622 | 3.716277 | -0.867121 |
| H  | 3.806893  | -0.047809 | 3.930700  | C | -2.573767 | 2.525476 | -0.355575 |
| H  | 3.796864  | -0.746428 | 2.293215  | H | -3.063748 | 2.154627 | 0.547487  |
| Rh | 1.648311  | 0.068009  | -0.149012 | C | -0.947839 | 0.454628 | 1.305048  |

### 12-Ir-a

| Atom | X         | Y         | Z         | Atom | X         | Y         | Z         |
|------|-----------|-----------|-----------|------|-----------|-----------|-----------|
| O    | 0.666937  | 3.573520  | 0.524675  | H    | -2.676492 | 3.601691  | 4.200692  |
| N    | 0.927878  | 1.373096  | 0.059252  | C    | -3.843652 | 1.789878  | 4.127514  |
| C    | 0.182586  | -3.342552 | -2.256149 | H    | -4.582422 | 2.143885  | 4.856436  |
| H    | -0.038413 | -4.020374 | -3.100343 | C    | -3.970865 | 0.529850  | 3.565315  |
| H    | 0.512600  | -3.969198 | -1.413051 | H    | -4.810654 | -0.116437 | 3.848324  |
| H    | 1.037444  | -2.714273 | -2.555441 | C    | -3.041830 | 0.085633  | 2.639507  |
| C    | -1.008028 | -2.533407 | -1.910738 | H    | -3.138683 | -0.908475 | 2.182248  |
| C    | -2.007018 | -2.891348 | -0.949543 | C    | -0.101613 | -0.669814 | 1.578708  |
| C    | -3.023338 | -1.907274 | -0.994122 | C    | -0.265030 | -1.592478 | 2.655402  |
| C    | -2.648860 | -0.926725 | -1.960735 | H    | -0.918251 | -1.318803 | 3.494244  |
| C    | -1.406368 | -1.329852 | -2.550001 | C    | 0.377512  | -2.788237 | 2.632068  |
| C    | -0.737274 | -0.676353 | -3.697712 | H    | 0.243206  | -3.497756 | 3.459687  |
| H    | -1.112858 | -1.070991 | -4.660492 | C    | 1.212424  | -3.139185 | 1.540748  |
| H    | 0.352647  | -0.835715 | -3.683758 | H    | 1.663494  | -4.139328 | 1.502394  |
| H    | -0.909678 | 0.411784  | -3.706643 | C    | 1.512774  | -2.229869 | 0.580277  |
| C    | -1.999172 | -4.098797 | -0.092595 | H    | 2.218819  | -2.494177 | -0.214523 |
| H    | -2.519649 | -3.925875 | 0.864081  | C    | 0.937717  | -0.914069 | 0.572291  |
| H    | -0.975863 | -4.423274 | 0.153180  | C    | 1.722456  | 0.263954  | 0.167840  |
| H    | -2.502282 | -4.950371 | -0.586474 | C    | 3.082095  | 0.366135  | 0.061028  |
| C    | -4.294498 | -1.918271 | -0.237379 | C    | 4.001669  | -0.772290 | 0.271953  |
| H    | -5.108754 | -2.359983 | -0.841400 | C    | 4.286389  | -1.218650 | 1.559203  |
| H    | -4.619823 | -0.903467 | 0.044952  | H    | 3.796721  | -0.731189 | 2.412682  |
| H    | -4.222638 | -2.512835 | 0.687268  | C    | 5.145606  | -2.284797 | 1.763772  |
| C    | -3.509064 | 0.169013  | -2.451691 | H    | 5.347873  | -2.632701 | 2.783928  |
| H    | -4.122374 | -0.181509 | -3.302779 | C    | 5.749057  | -2.909484 | 0.684501  |
| H    | -2.923538 | 1.032620  | -2.800502 | H    | 6.428638  | -3.754349 | 0.846549  |
| H    | -4.201080 | 0.535606  | -1.678280 | C    | 5.493413  | -2.457613 | -0.600897 |
| C    | -0.498931 | 1.137793  | 0.102974  | H    | 5.971655  | -2.943066 | -1.460215 |
| C    | -1.280905 | 2.117350  | -0.682331 | C    | 4.629074  | -1.394351 | -0.803704 |
| C    | -0.734840 | 2.610795  | -1.872371 | H    | 4.419171  | -1.039447 | -1.821544 |
| H    | 0.275351  | 2.298214  | -2.169436 | C    | 3.650442  | 1.667935  | -0.142744 |
| C    | -1.434183 | 3.485697  | -2.680478 | C    | 5.022604  | 1.877722  | -0.355578 |
| H    | -0.967819 | 3.855220  | -3.602094 | H    | 5.699124  | 1.017975  | -0.417198 |

|    |           |           |           |   |           |           |           |
|----|-----------|-----------|-----------|---|-----------|-----------|-----------|
| C  | 5.527426  | 3.150792  | -0.479925 | H | -1.207196 | -0.658830 | 3.727375  |
| C  | 4.695251  | 4.266104  | -0.383443 | C | -0.452131 | -2.430975 | 2.812491  |
| H  | 5.111145  | 5.275072  | -0.482877 | H | -0.702310 | -3.065953 | 3.673210  |
| C  | 3.352432  | 4.085784  | -0.149908 | C | 0.170788  | -3.007381 | 1.676089  |
| H  | 2.667740  | 4.936390  | -0.051607 | H | 0.314686  | -4.094577 | 1.629043  |
| C  | 2.824228  | 2.801257  | -0.034829 | C | 0.653917  | -2.222979 | 0.680111  |
| C  | 1.405233  | 2.655513  | 0.233926  | H | 1.193817  | -2.683582 | -0.155248 |
| H  | 6.602516  | 3.288102  | -0.649595 | C | 0.468806  | -0.797993 | 0.673857  |
| Ir | -1.033309 | -0.863853 | -0.397598 | C | 1.516657  | 0.120058  | 0.203385  |

### 12-Ir-b

| Atom | X         | Y         | Z         |    |           |           |           |
|------|-----------|-----------|-----------|----|-----------|-----------|-----------|
| O    | 1.459330  | 3.578876  | 0.652457  | C  | 2.833498  | -0.153072 | -0.040608 |
| N    | 1.051929  | 1.408412  | 0.165946  | C  | 3.409832  | -1.512693 | 0.040915  |
| C    | -1.503918 | -3.296165 | -1.625075 | C  | 3.732499  | -2.079919 | 1.270208  |
| H    | -2.099023 | -3.965085 | -2.273387 | H  | 3.533109  | -1.512076 | 2.188280  |
| H    | -1.375371 | -3.809787 | -0.658398 | C  | 4.270576  | -3.353705 | 1.341562  |
| H    | -0.505975 | -3.204890 | -2.082808 | H  | 4.506189  | -3.791567 | 2.319018  |
| C    | -2.168183 | -1.981516 | -1.482920 | C  | 4.511974  | -4.073612 | 0.182536  |
| C    | -3.231468 | -1.685416 | -0.579912 | H  | 4.937300  | -5.082689 | 0.238804  |
| C    | -3.656733 | -0.359402 | -0.837389 | C  | 4.220208  | -3.508816 | -1.049474 |
| C    | -2.872600 | 0.158883  | -1.912125 | H  | 4.415558  | -4.069473 | -1.971622 |
| C    | -1.953579 | -0.850477 | -2.326008 | C  | 3.675187  | -2.237656 | -1.118055 |
| C    | -1.043994 | -0.799343 | -3.494960 | H  | 3.436358  | -1.791248 | -2.092579 |
| H    | -1.501081 | -1.260984 | -4.390568 | C  | 3.717550  | 0.943950  | -0.312398 |
| H    | -0.098391 | -1.331928 | -3.302852 | C  | 5.065069  | 0.775967  | -0.671309 |
| H    | -0.778825 | 0.235688  | -3.762903 | H  | 5.469939  | -0.234562 | -0.797686 |
| C    | -3.763799 | -2.601104 | 0.454984  | C  | 5.882883  | 1.866564  | -0.857945 |
| H    | -4.226733 | -2.049648 | 1.290631  | C  | 5.401431  | 3.164050  | -0.684237 |
| H    | -2.971246 | -3.235262 | 0.887676  | H  | 6.064327  | 4.022869  | -0.836682 |
| H    | -4.534714 | -3.282479 | 0.050041  | C  | 4.091639  | 3.351650  | -0.308942 |
| C    | -4.781091 | 0.373803  | -0.210632 | H  | 3.679632  | 4.354359  | -0.144436 |
| H    | -5.643281 | 0.438033  | -0.900290 | C  | 3.248339  | 2.257225  | -0.127888 |
| H    | -4.501447 | 1.410545  | 0.048250  | C  | 1.877371  | 2.498033  | 0.286728  |
| H    | -5.138862 | -0.112822 | 0.709669  | H  | 6.930860  | 1.709814  | -1.141966 |
| C    | -3.134513 | 1.460116  | -2.564377 | Ir | -1.432788 | -0.248554 | -0.217531 |
| H    | -4.137498 | 1.464021  | -3.028662 | N  | -0.905523 | 2.668771  | -0.464657 |
| H    | -2.404656 | 1.680863  | -3.356763 | N  | -1.916890 | 1.699167  | 2.230222  |
| H    | -3.103644 | 2.294926  | -1.842865 | C  | -1.379953 | 3.877466  | 0.141860  |
| C    | -0.397643 | 1.576453  | 0.241230  | H  | -1.962072 | 4.419717  | -0.626515 |
| C    | -0.985183 | 1.018062  | 1.441264  | H  | -2.066656 | 3.653369  | 0.967687  |
| C    | -0.416741 | -0.272268 | 1.726288  | H  | -0.576790 | 4.548898  | 0.501832  |
| C    | -0.743466 | -1.105371 | 2.841759  | C  | -0.280267 | 2.888193  | -1.726565 |
|      |           |           |           | H  | 0.671342  | 3.462068  | -1.670346 |
|      |           |           |           | H  | -0.069671 | 1.921888  | -2.220085 |
|      |           |           |           | H  | -0.966539 | 3.462677  | -2.375010 |
|      |           |           |           | C  | -3.025120 | 0.983210  | 2.782953  |

|   |           |          |          |
|---|-----------|----------|----------|
| H | -2.844263 | 0.589305 | 3.807203 |
| H | -3.902493 | 1.655440 | 2.848839 |
| H | -3.288428 | 0.134939 | 2.130535 |
| C | -1.304681 | 2.578262 | 3.182078 |
| H | -0.886710 | 2.034519 | 4.061885 |
| H | -0.483565 | 3.141803 | 2.706793 |
| H | -2.051202 | 3.302388 | 3.557684 |

**12-Ir-c**

| Atom | X         | Y         | Z         |
|------|-----------|-----------|-----------|
| O    | -1.004430 | -3.549291 | -0.248020 |
| N    | -0.965328 | -1.386268 | 0.470543  |
| C    | 1.037932  | 0.907157  | -3.285519 |
| H    | 1.506704  | 1.077135  | -4.272025 |
| H    | 0.555629  | 1.852482  | -2.989373 |
| H    | 0.238546  | 0.161889  | -3.425236 |
| C    | 2.034379  | 0.462213  | -2.284641 |
| C    | 2.881136  | 1.326496  | -1.510832 |
| C    | 3.740175  | 0.522219  | -0.735136 |
| C    | 3.392630  | -0.843886 | -0.967242 |
| C    | 2.365668  | -0.877870 | -1.973722 |
| C    | 1.822972  | -2.097948 | -2.614546 |
| H    | 2.485350  | -2.455758 | -3.424883 |
| H    | 0.831063  | -1.920560 | -3.059450 |
| H    | 1.709994  | -2.928232 | -1.898674 |
| C    | 2.911911  | 2.805837  | -1.576611 |
| H    | 3.065913  | 3.264345  | -0.584071 |
| H    | 1.975558  | 3.220326  | -1.980812 |
| H    | 3.734003  | 3.162391  | -2.224775 |
| C    | 4.827147  | 1.028333  | 0.131596  |
| H    | 5.702613  | 1.336054  | -0.470495 |
| H    | 5.179431  | 0.269775  | 0.846984  |
| H    | 4.517591  | 1.913510  | 0.713564  |
| C    | 4.129921  | -2.028864 | -0.472518 |
| H    | 4.982264  | -2.270187 | -1.134612 |
| H    | 3.488615  | -2.923308 | -0.435623 |
| H    | 4.540115  | -1.875849 | 0.539039  |
| C    | 0.414170  | -1.374580 | 0.956453  |
| C    | 0.790036  | -0.305719 | 1.885049  |
| C    | 0.346049  | 0.982202  | 1.482222  |
| C    | 0.685017  | 2.243367  | 2.058179  |
| H    | 1.168185  | 2.280832  | 3.043999  |
| C    | 0.406875  | 3.386311  | 1.375702  |

|   |           |           |           |
|---|-----------|-----------|-----------|
| H | 0.677044  | 4.359312  | 1.808232  |
| C | -0.217827 | 3.343322  | 0.102850  |
| H | -0.370185 | 4.275427  | -0.455801 |
| C | -0.696545 | 2.171134  | -0.389249 |
| H | -1.277485 | 2.154439  | -1.321345 |
| C | -0.490128 | 0.936186  | 0.301856  |
| C | -1.497359 | -0.134905 | 0.259731  |
| C | -2.830246 | 0.054095  | 0.026966  |
| C | -3.433196 | 1.399670  | 0.057277  |
| C | -3.317533 | 2.180934  | 1.205186  |
| H | -2.763963 | 1.779978  | 2.065443  |
| C | -3.867870 | 3.448649  | 1.262632  |
| H | -3.758122 | 4.048802  | 2.173745  |
| C | -4.559428 | 3.955900  | 0.174151  |
| H | -4.999090 | 4.959378  | 0.217072  |
| C | -4.698312 | 3.182709  | -0.968750 |
| H | -5.244492 | 3.576056  | -1.834573 |
| C | -4.143348 | 1.916320  | -1.025870 |
| H | -4.243686 | 1.312890  | -1.937957 |
| C | -3.651892 | -1.104059 | -0.172007 |
| C | -5.045102 | -1.055234 | -0.327301 |
| H | -5.567875 | -0.096476 | -0.239984 |
| C | -5.763236 | -2.200852 | -0.583262 |
| C | -5.124244 | -3.433735 | -0.698032 |
| H | -5.705038 | -4.339896 | -0.904034 |
| C | -3.759634 | -3.505050 | -0.535726 |
| H | -3.225588 | -4.459563 | -0.604194 |
| C | -3.021970 | -2.357041 | -0.254662 |
| C | -1.589206 | -2.506564 | -0.030988 |
| H | -6.852845 | -2.139331 | -0.694667 |
| C | 1.586615  | -0.460764 | 3.152614  |
| H | 1.514686  | -1.491351 | 3.534345  |
| H | 1.094529  | 0.162322  | 3.927034  |
| C | 1.014871  | -2.712320 | 1.316749  |
| H | 2.034377  | -2.482151 | 1.680099  |
| H | 1.154526  | -3.344274 | 0.426967  |
| C | 0.268640  | -3.491681 | 2.382008  |
| H | 0.913762  | -4.274253 | 2.812939  |
| H | -0.065187 | -2.848331 | 3.213155  |
| H | -0.619653 | -3.991437 | 1.974331  |
| C | 3.042561  | -0.073406 | 3.056998  |
| H | 3.171890  | 0.936137  | 2.633144  |
| H | 3.525927  | -0.091180 | 4.047568  |
| H | 3.593854  | -0.769310 | 2.402633  |

|                  |           |           |           |                  |           |           |           |
|------------------|-----------|-----------|-----------|------------------|-----------|-----------|-----------|
| Ir               | 1.508753  | 0.033308  | -0.132038 | C                | -4.597894 | -0.844658 | -0.182018 |
|                  |           |           |           | H                | -4.809630 | -0.230674 | -1.067483 |
| <b>product-a</b> |           |           |           | C                | -5.554101 | -1.722453 | 0.298576  |
|                  |           |           |           | H                | -6.526982 | -1.793565 | -0.202677 |
| Atom             | X         | Y         | Z         | C                | -5.282866 | -2.513293 | 1.403909  |
| O                | 0.493340  | 2.632113  | -1.639377 | H                | -6.041147 | -3.208901 | 1.782509  |
| N                | -0.047216 | 0.686291  | -0.609119 | C                | -4.050816 | -2.415058 | 2.030557  |
| C                | 1.288118  | 0.352907  | -0.390976 | H                | -3.831292 | -3.029455 | 2.912069  |
| C                | 2.191325  | 1.451411  | 0.003668  | C                | -3.097137 | -1.535865 | 1.552263  |
| C                | 1.835188  | 2.256923  | 1.081466  | H                | -2.120717 | -1.456953 | 2.047752  |
| H                | 0.860069  | 2.111284  | 1.566856  | C                | -2.598520 | 1.585743  | -0.109069 |
| C                | 2.705716  | 3.222684  | 1.550998  | C                | -3.799516 | 2.150601  | 0.350465  |
| H                | 2.417002  | 3.843181  | 2.407882  | H                | -4.542799 | 1.516694  | 0.845274  |
| C                | 3.939356  | 3.400028  | 0.946399  | C                | -4.051134 | 3.493127  | 0.191275  |
| H                | 4.630853  | 4.164702  | 1.319394  | C                | -3.125546 | 4.330930  | -0.432299 |
| C                | 4.293031  | 2.609424  | -0.135166 | H                | -3.341880 | 5.397843  | -0.554942 |
| H                | 5.262821  | 2.752109  | -0.626455 | C                | -1.933209 | 3.807027  | -0.869860 |
| C                | 3.425496  | 1.641244  | -0.604902 | H                | -1.165663 | 4.435157  | -1.336806 |
| H                | 3.702692  | 1.022432  | -1.466677 | C                | -1.656873 | 2.451422  | -0.695919 |
| C                | 1.669708  | -0.945365 | -0.331694 | C                | -0.341633 | 1.978012  | -1.063075 |
| C                | 3.049227  | -1.304832 | 0.067843  | H                | -4.995530 | 3.909342  | 0.563466  |
| C                | 3.960448  | -1.806423 | -0.855939 |                  |           |           |           |
| H                | 3.649421  | -1.937595 | -1.900869 | <b>product-b</b> |           |           |           |
| C                | 5.256077  | -2.111604 | -0.473773 | Atom             | X         | Y         | Z         |
| H                | 5.965572  | -2.497011 | -1.215913 | O                | 1.014864  | 2.870841  | -1.296406 |
| C                | 5.656655  | -1.920521 | 0.838836  | N                | 0.634977  | 0.892201  | -0.252220 |
| H                | 6.684208  | -2.156060 | 1.140428  | C                | 1.974285  | 0.760513  | 0.114609  |
| C                | 4.753827  | -1.430891 | 1.767763  | C                | 2.571692  | -0.461221 | 0.041934  |
| H                | 5.063902  | -1.277881 | 2.808267  | C                | 1.787622  | -1.580551 | -0.400285 |
| C                | 3.457962  | -1.130351 | 1.386598  | C                | 2.383144  | -2.816191 | -0.686401 |
| H                | 2.745319  | -0.730059 | 2.119415  | H                | 3.469809  | -2.912913 | -0.610469 |
| C                | 0.701828  | -1.977863 | -0.606448 | C                | 1.633886  | -3.900319 | -1.076859 |
| C                | 1.071402  | -3.312999 | -0.798064 | H                | 2.127062  | -4.853284 | -1.302201 |
| H                | 2.124885  | -3.596908 | -0.705338 | C                | 0.257613  | -3.771529 | -1.218519 |
| C                | 0.133192  | -4.269688 | -1.114165 | H                | -0.345002 | -4.613067 | -1.577748 |
| H                | 0.444518  | -5.309550 | -1.266945 | C                | -0.356240 | -2.575258 | -0.922417 |
| C                | -1.198704 | -3.906183 | -1.268021 | H                | -1.433744 | -2.493270 | -1.076997 |
| H                | -1.945201 | -4.648318 | -1.572513 | C                | 0.376227  | -1.470162 | -0.471547 |
| C                | -1.588708 | -2.605717 | -1.037415 | C                | -0.244209 | -0.188551 | -0.176972 |
| H                | -2.637115 | -2.335736 | -1.181035 | C                | -1.575709 | 0.075704  | 0.045733  |
| C                | -0.662170 | -1.628967 | -0.658059 | C                | -2.576407 | -0.979304 | 0.289870  |
| C                | -1.055051 | -0.252134 | -0.396687 | C                | -3.670636 | -1.120330 | -0.563501 |
| C                | -2.312253 | 0.182202  | -0.052270 | H                | -3.764097 | -0.448371 | -1.426688 |
| C                | -3.350677 | -0.746326 | 0.432396  |                  |           |           |           |



|                  |           |           |           |   |           |           |           |
|------------------|-----------|-----------|-----------|---|-----------|-----------|-----------|
| C                | -4.618449 | -2.103059 | -0.345471 | C | -2.804876 | -0.210460 | 0.333010  |
| H                | -5.467527 | -2.203098 | -1.032046 | C | -2.159782 | -1.389146 | -0.191734 |
| C                | -4.492452 | -2.962426 | 0.734806  | C | -2.862689 | -2.569280 | -0.457989 |
| H                | -5.242644 | -3.742832 | 0.909789  | H | -3.939048 | -2.618268 | -0.260960 |
| C                | -3.415668 | -2.825084 | 1.597309  | C | -2.232224 | -3.666390 | -1.000460 |
| H                | -3.314562 | -3.494852 | 2.459672  | H | -2.805699 | -4.576511 | -1.212195 |
| C                | -2.468343 | -1.840056 | 1.379984  | C | -0.878979 | -3.604566 | -1.306869 |
| H                | -1.613567 | -1.734688 | 2.060470  | H | -0.377761 | -4.458169 | -1.777057 |
| C                | -2.026087 | 1.437284  | -0.003147 | C | -0.163929 | -2.459274 | -1.037691 |
| C                | -3.327303 | 1.832834  | 0.353376  | H | 0.890802  | -2.415740 | -1.319974 |
| H                | -4.020889 | 1.095879  | 0.772797  | C | -0.777915 | -1.346664 | -0.454159 |
| C                | -3.739438 | 3.133697  | 0.184363  | C | -0.060547 | -0.105466 | -0.210637 |
| C                | -2.884492 | 4.098408  | -0.350762 | C | 1.297057  | 0.019184  | -0.046345 |
| H                | -3.229579 | 5.129598  | -0.483279 | C | 2.142744  | -1.147237 | 0.268152  |
| C                | -1.600626 | 3.743428  | -0.688420 | C | 1.843395  | -1.924574 | 1.384957  |
| H                | -0.887976 | 4.474673  | -1.088241 | H | 0.979282  | -1.652039 | 2.004738  |
| C                | -1.162682 | 2.433802  | -0.498413 | C | 2.611358  | -3.026938 | 1.708832  |
| C                | 0.223539  | 2.128138  | -0.763974 | H | 2.357985  | -3.627172 | 2.591055  |
| H                | -4.758960 | 3.414366  | 0.476363  | C | 3.703190  | -3.367517 | 0.926875  |
| N                | 2.566833  | 1.864332  | 0.642337  | H | 4.314505  | -4.241280 | 1.182298  |
| N                | 3.881669  | -0.574379 | 0.540642  | C | 4.022415  | -2.593943 | -0.177384 |
| C                | 4.025585  | -1.367546 | 1.718701  | H | 4.885581  | -2.856239 | -0.801249 |
| H                | 3.235037  | -1.107421 | 2.442500  | C | 3.250434  | -1.492591 | -0.503825 |
| H                | 3.987164  | -2.468875 | 1.546848  | H | 3.495821  | -0.892978 | -1.390595 |
| H                | 5.002402  | -1.145625 | 2.188436  | C | 1.884422  | 1.322822  | -0.116432 |
| C                | 4.944842  | -0.760589 | -0.397139 | C | 3.231749  | 1.586834  | 0.177619  |
| H                | 5.172987  | -1.825396 | -0.634433 | H | 3.873838  | 0.780521  | 0.547755  |
| H                | 4.707933  | -0.253268 | -1.346799 | C | 3.752915  | 2.848137  | 0.010569  |
| H                | 5.879029  | -0.318185 | 0.002506  | C | 2.960530  | 3.897337  | -0.457691 |
| C                | 1.832320  | 2.761265  | 1.468095  | H | 3.389860  | 4.896922  | -0.589707 |
| H                | 2.470717  | 3.067995  | 2.319009  | C | 1.633814  | 3.667622  | -0.732231 |
| H                | 1.516794  | 3.682587  | 0.934748  | H | 0.971458  | 4.470704  | -1.075501 |
| H                | 0.938527  | 2.267025  | 1.883071  | C | 1.087562  | 2.398177  | -0.549405 |
| C                | 3.755026  | 2.408628  | 0.080964  | C | -0.340319 | 2.241312  | -0.736065 |
| H                | 4.124513  | 1.769158  | -0.731564 | H | 4.807426  | 3.029770  | 0.252197  |
| H                | 3.548884  | 3.412544  | -0.347408 | C | -4.165913 | -0.346163 | 0.948865  |
| H                | 4.552179  | 2.510364  | 0.842099  | H | -4.248873 | 0.297570  | 1.842343  |
|                  |           |           |           | H | -4.275260 | -1.372537 | 1.342837  |
| <b>product-c</b> |           |           |           | C | -2.762888 | 2.259346  | 0.738919  |
|                  |           |           |           | H | -3.758267 | 2.026047  | 1.143955  |
| Atom             | X         | Y         | Z         | H | -2.933362 | 2.986647  | -0.068106 |
| O                | -1.061338 | 3.099776  | -1.190153 | C | -1.928039 | 2.883919  | 1.838112  |
| N                | -0.861133 | 1.035079  | -0.261993 | H | -2.441089 | 3.766130  | 2.252350  |
| C                | -2.182290 | 0.986043  | 0.208576  | H | -1.761732 | 2.173383  | 2.665549  |

|   |           |           |           |
|---|-----------|-----------|-----------|
| H | -0.939163 | 3.223470  | 1.489305  |
| C | -5.297727 | -0.043726 | -0.009089 |
| H | -5.257834 | -0.692661 | -0.900614 |
| H | -6.280805 | -0.189666 | 0.468490  |
| H | -5.249837 | 0.997545  | -0.370629 |
